# Supplementary material for: Cell-specific non-canonical amino acid labelling identifies changes in the de novo proteome during memory formation
Source: eLife. 2020 Jan 6;9:e52990. doi: 10.7554/eLife.52990 (PMC6944461; doi:10.7554/eLife.52990)
Supplement: Figure 1—figure supplement 1—source data 1. [file elife-52990-fig1-figsupp1-data1.xlsx]

## Sheet: Sheet1
Time	AHA				PBS
0-5	5	7	5	8	6	8	8	4
5-10	2	5	1	2	1	3	8	4
10-15	2	9	1	2	1	3	8	4
15-20	0	7	1	0	1	2	0	2
20-25	0	5	0	1	0	1	3	4
25-30	3	2	1	2	0	2	3	3
Probe	2	2	1	1	3	2	3	1
