# Supplementary material for: Cell-specific non-canonical amino acid labelling identifies changes in the de novo proteome during memory formation
Source: eLife. 2020 Jan 6;9:e52990. doi: 10.7554/eLife.52990 (PMC6944461; doi:10.7554/eLife.52990)
Supplement: Figure 3—figure supplement 1—source data 1. [file elife-52990-fig3-figsupp1-data1.xlsx]

## Sheet: Sheet1
	0-5	5-10	10-15	15-20	20-25	25-30	16h Probe	1 Week probe
Anl	11	10	8	8	7	4	5	5
	11	7	5	5	4	6	3	4
	9	2	3	4	2	2	4	3
	10	10	8	8	7	3	4	5
PBS	9	8	10	8	11	4	5	4
	9	11	10	10	10	4	4	5
	9	10	9	9	6	2	4	4
	12	6	11	6	4	4	2	5
