# Supplementary material for: Cell-specific non-canonical amino acid labelling identifies changes in the de novo proteome during memory formation
Source: eLife. 2020 Jan 6;9:e52990. doi: 10.7554/eLife.52990 (PMC6944461; doi:10.7554/eLife.52990)
Supplement: Figure 3—figure supplement 2—source data 1. [file elife-52990-fig3-figsupp2-data1.xlsx]

## Sheet: Sheet1
	0-5	5-10	10-15	15-20	20-25	25-30	Probe
Anisomycin	7	1	1	0	4	0	8
	8	4	1	0	2	1	4
	3	0	2	0	1	1	10
	4	0	2	1	0	0	8
PBS	7	6	5	6	6	4	1
	5	3	2	0	3	0	1
	5	6	4	0	0	0	4
	4	5	1	1	0	1	2
