# Supplementary material for: Cell-specific non-canonical amino acid labelling identifies changes in the de novo proteome during memory formation
Source: eLife. 2020 Jan 6;9:e52990. doi: 10.7554/eLife.52990 (PMC6944461; doi:10.7554/eLife.52990)
Supplement: Figure 3—source data 1. [file elife-52990-fig3-data1.xlsx]

## Sheet: Number of entries
Time	RC3 xCamk2a-Cre Trained 1	RC3 xCamk2a-Cre Trained 2	RC3 xCamk2a-Cre Trained 3	RC3 xCamk2a-Cre Trained 4
0-5	8	8	5	15
5-10	6	2	4	2
10-15	5	2	5	6
15-20	8	2	3	6
20-25	6	0	1	6
25-30	3	3	0	4
