# Supplementary material for: Cell-specific non-canonical amino acid labelling identifies changes in the de novo proteome during memory formation
Source: eLife. 2020 Jan 6;9:e52990. doi: 10.7554/eLife.52990 (PMC6944461; doi:10.7554/eLife.52990)
Supplement: Supplementary file 1. [file elife-52990-supp1.xlsx]

## Sheet: Sheet1
Peptides - Anl treated RC3xCamk2a-Cre	Peptides - Background purified	Peptides - Both
AIAELGIYPAVDPLDSTSR	AQEILAR	GVVVATGDR
ADKLAEEHGS	NMVPQQALVIR	GGQDNIPVLK
LVPLKETIK	GGDRVPADLR	AGFAGDDAPR
TREGNDLYHEMIESGVINLK	VDNSSLTGESEPQTR	AVFPSIVGR
AHGGYSVFAGVGER	DVAGDASESALLK	AVFPSIVGRPR
PAPATTFAHLDATTVLSR	VAEIPFNSTNK	DSYVGDEAQSK
VLDSGAPIKIPVGPETLGR	CATILLQGK	VAPEEHPVLLTEAPLNPK
VLDSGAPIK	AAVPDAVGK	GYSFTTTAER
FLSQPFQVAEVFTGHMGK	GVGIISEGNETVEDIAAR	SYELPDGQVITIGNER
VVDLLAPYAKG	LNIPVSQVNPR	VLDELTLSK
IYVPADDLTDPAPATTFAHLDATTVLSR	TEIVFAR	QSLEASLAETEGR
VVDLLAPYAK	LIIVEGCQR	ALEEQLQQIR
TVLIMELINNVAK	QAADMILLDDNFASIVTGVEEGR	LENEIQTYR
LVLEVAQHLGESTVR	ASIVTGVEEGR	LHIIEVGTPPTGNQPFPK
KGSITSVQAIYVPADDLTDPAPATTFAHLDATTVLSR	SIVTGVEEGR	NNLAGAEELFAR
IMNVIGEPIDER	LNWDDR	SVDPTLALSVYLR
IGLFGGAGVGK	LLTEAPLNPK	NNRPSEGPLQTR
VALTGLTVAEYFR	VLSLYASGR	LLLPWLEAR
TIAMDGTEGLVR	GQVITIGNER	IYIDSNNNPER
VALVYGQMNEPPGAR	IIAPPER	IVLDNSVFSEHR
IPSAVGYQPTLATDMGTMQER	VTMQNLNDR	EAIDSYIK
IMDPNIVGNEHYDVAR	ALEESNYELEGK	LASTLVHLGEYQAAVDGAR
SVEQEILVTGIK	LAADDFR	VLSIGDGIAR
DQEGQDVLLFIDNIFR	QSVEADINGLR	TGAIVDVPVGEELLGR
QASEGPLK	QSVEADINGLRR	VVDALGNAIDGK
VPTPNVSVVDLTC[CAM]R	APGIIPR	AVDSLVPIGR
LEKPAKYDDIK	NLDIERPTYTNLNR	EAYPGDVFYLHSR
SHSSTFDAGAGIALNDNFVK	TEFQTNLVPYPR	AVFVDLEPTVIDEVR
ASC[CAM]TTNC[CAM]LAPLAK	IHFPLATYAPVISAEK	VDLEPTVIDEVR
VIISAPSADAPMFVMGVNHEK	ATYAPVISAEK	EIIDLVLDR
VSVVDLTC[CAM]R	SIQFVDWCPTGFK	DVNAAIATIK
IIPASTGAAK	SNTTAIAEAWAR	SLDLDSIIAEVK
AAQNIIPASTGAAK	FASFIDK	YEELQQTAGR
VVDLMAYMASKE	NKYEDEINKR	LRSEIDNVKK
IVSNASC[CAM]TTNC[CAM]LAPLAK	KYEDEINKR	MVIPGGIDVHTR
LISWYDNEYGYSNR	LALDVEIATYR	SAAEVIAQAR
VPTPNVSVVDLT	GLLECCAR	DNFTLIPEGTNGTEER
LVINGKPITIFQER	GLSATVTGGQKGR	VFNLYPR
VVDLMAYMASK	TSASIGSLCADAR	ISVGSDADLVIWDPDSVK
VIHDNFGIVEGLMTTVHAITATQK	TTHYGSLPQK	GSPLVVISQGK
WGEAGAEYVVESTGVFTTMEK	GHYTEGAELVDSVLDVVR	LIETYFSK
VIHDNFGIVEGL	LAVNMVPFPR	QIFGDYK
RVIISAPSADAPMFVMGVNHEK	ISEQFTAMFR	GLSATVTGGQK
LVINGKPITIFQERDPTNIK	NTGIICTIGPASR	MYGVLPWNAFPGK
PITIFQER	GDQALSFLK	YLATASTMDHAR
VIHDNFGIVEGLM	GNLANVIR	HRDTGILDSIGR
VIHDNFGIVEGLMTTVH	DLFDPIIEER	DTGILDSIGR
GILGYTEDQVVSC[CAM]DFNSNSH	VGGVFDVSNADR	TQDENPVVHFFK
ILGADTSVDLEETGR	SLNDKFASFIDK	AVLVDLEPGTMDSVR
RTGAIVDVPVGEELLGR	TNAENEFVTIK	LDIDSAPITAR
TGTAEMSSILEER	TNAENEFVTIKK	GDYPLEAVR
ISEQSDAK	YEELQITAGK	APIIAVTR
RLTDADAMK	LDEDLAGYCR	DAVLNAWAEDVDLR
LELAQYR	LASYLDK	DFLAGGIAAAVSK
TSIAIDTIINQK	VLDELTLAR	TAVAPIER
RFNDGTDEK	TRLEQEIATYR	GAWSNVLR
HALIIYDDLSK	LLLLGAGESGK	VLTPELYAELR
LKEIVTNFLAGFEP	TTVHAITATQK	LAVEALSSLDGDLSGR
EVAAFAQFGSDLDAATQQLLSR	VPTPNVSVVDLTCR	FLEQQNQVLQTK
GIRPAINVGLSVSR	VSVVDLTCR	VLVLDDTNHER
FENAFLSHVISQHQSLLGNIR	AAVPSGASTGIYEALELR	LELVSYFGK
EIVTNFLAGFEP	SLLAPLNVELDPEIQK	DLLDILQQVK
GMSLNLEPDNVGVVVFGNDK	ALDIEIATYR	GGSQGEAVGELPR
AQFGSDLDAATQQLLSR	NVIGEPIDER	EVATNSELVQSGK
SLNLEPDNVGVVVFGNDK	LSLDELGR	IGAGDYQPTEQDILR
GIRPAINVGL	ESTLHLVLR	LFDVGGQR
VVDALGNAIDGKGPIGSK	LTLYDIAH	SQLLILDR
PAINVGLSVSR	GCDVVVIPAGVPR	ISEQTYQLSR
NVQAEEMVEFSSGLK	GAFSVVR	SSASFSTTAVSAR
QGQYSPMAIEEQVAVIYAGVR	VTGGELFEDIVAR	VGVNGFGR
VVDALGNAIDGKG	GVVDSEDLPLNISR	VEIVAINDPF
LYC[CAM]IYVAIGQK	LGIHEDSQNR	GAAQNIIPASTGAAK
AIEEQVAVIYAGVR	NLLSVAYK	SQFTITPGSEQIR
FNDGTDEK	LQIWDTAGQER	DGYAQILR
FGSDLDAATQQLLSR	STELLIR	NTIVTSYNR
NLHQSGFSLSGAQIDDNIPR	QLGGQLIQEPR	SPDFTNENPLETR
ILDLGITGPEGHVLSRPEEVEAEAVNR	AEGFNLLSK	GIVVYTGDR
DIGAIAQVHAENGDIIAEEQQR	EIISEVQR	LNIPVNQVNPR
FQLTDSQIYEVLSVIR	TVFDEAIR	TIAPALVSK
GIQEEMEALVK	ALQYLR	YITPDQLADLYK
ADLVIWDPDSVK	WELLQQVNTSTR	NVELDPEIQK
GLYDGPVC[CAM]EVSVTPK	AILVDLEPGTMDSVR	LALDIEIATYR
GTVVYGEPITASLGTDGSHYWSK	TDAIPGR	FTQAGSEVSALLGR
SITIANQTNC[CAM]PLYVTK	IEEELGDEAR	GIVIATGDR
AVGKDNFTLIPEGTNGTEER	TLLEAENSR	DLDVAVLVGSMPR
AAAFVTSPPLSPDPTTPDFLNSLLSC[CAM]GDLQVTGSAHC[CAM]TFNTAQK	HLGALIR	GEFITTVQQR
IVLEDGTLHVTEGSGR		FVEGLPINDFSR
THNSALEYNIFEGMEC[CAM]R		GFSSGSAVVSGGSR
SC[CAM]C[CAM]DYSLHVDITEWHK		DYQELMNTK
ILDLGITGPEGH		AVFVDLEPTVIDEIR
KGTVVYGEPITASLGTDGSHYWSK		EIIDPVLDR
DLGITGPEGHVLSRPEEVEAEAVNR		TLSDYNIQK
FQMPDQGMTSADDFFQGTK		DAGTIAGLNVLR
KKGTVVYGEPITASLGTDGSHYWSK		SQIHDIVLVGGSTR
ILDLGITGPEGHVLSRPEEVEAE		IQEAGTEVVK
TVTPASSAK		ITQYLDAGGIPR
DHGVNSFLVY		SSVLENFVGR
SLSGAQIDDNIPR		DITAALAAER
FQLTDSQIYEVL		QLLLTADDR
EAFSLFDKDGDGTITTK		IQTQPGYANTLR
RDVAGDASESALLK		SYEAYVLNIIR
VLGFC[CAM]HYYLPEEQFPKG		GLTSVINQK
KADIGVAMGIAGSDVSK		GLVLIAFSQ
AVFKGGQDNIPVLK		LGEYGFQNAILVR
NPGGWVEKETYY		ALEEANADLEVK
DFTSEQIDEILQNHTEIVFAR		YEELQVTAGR
YQLSIHETEDPNDNR		NLDLDSIIAEVK
VLGFC[CAM]HYYLPEEQFPK		VVVDALSGLK
GFLPGNLVGIR		LTGFHETSNINDFSAGVANR
GGQDNIPVLKR		IAATILTSPDLR
YLLVMKG		IGGIGTVPVGR
YNTDC[CAM]VQGLTHSK		GSETLGGGGGGAAGTR
SSHTWVALSHIAGLC[CAM]NR		SNVNDGVAQSTR
SPDC[CAM]THDNPLETR		VLENAEGAR
NITFFSTNC[CAM]VEGTAR		TTTNVLGDSLGAGIVEHLSR
C[CAM]ATILLQGK		TDESQPWVLPVVR
C[CAM]ATILLQGKEQPLDEEMKEAFQNAYLELGGLGER		AQYEDIAQK
IATLASGLEVGK		MQEDIEMTK
C[CAM]IELSSGSVK		VTLTPEEEAR
TVNDLEDSYGQQWTYEQR
AC[CAM]VIHGTDLK
KYNTDC[CAM]VQGLTHSK
EAFQNAYLELGGLGER
MQVNAEEVVVGDLVEIK
ADIGVAMGIAGSDVSK
EQPLDEEMKEAFQNAYLELGGLGER
IISAHGC[CAM]K
EVVVGDLVEIK
AEEVVVGDLVEIK
MWFDNQIHEADTTEDQSGTSFDK
IEEELGSK
AGYTDQVVIGMDVAASEFYR
HIADLAGNPEVILPVPAFNVINGGSHAGNK
DATNVGDEGGFAPNILENKEALELLK
FTASAGIQVVGDDLTVTNPK
DATNVGDEGGFAPNILENK
VNQIGSVTESLQAC[CAM]K
SC[CAM]NC[CAM]LLLK
LAMQEFMILPVGASSFR
LMIEMDGTENK
SFVQNYPVVSIEDPFDQDDWGAWQK
KVNVVEQEK
IDKLMIEMDGTENK
VVGDDLTVTNPK
LDLAGRDLTDYLMK
DLTDYLMK
EITALAPSTMK
MQKEITALAPSTMK
PEEHPVLLTEAPLNPK
VAPEEHPVLLT
QEYDESGPSIVHR
VAPEEHPVLLTEAPLN
LC[CAM]YVALDFEQEMATAASSSSLEK
TTGIVMDSGDGVTHTVPIYEGYALPHAILR
KDLYANTVLSGGTTMYPGIADR
DLYANTVLSGGTTMYPGIADR
TTGIVMDSGDGVTHTVPIYEGYALPH
IWHHTFYNELR
C[CAM]PEALFQPSFLGMESC[CAM]GIHETTFNSIMK
TVLSGGTTMYPGIADR
GIVTNWDDMEK
DSYVGDEAQSKR
SGGTTMYPGIADR
RLQSIGTENTEENR
LQSIGTENTEENR
AAQEEYIK
SKGGVVGIK
GILAADESTGSIAK
AAQEEYIKR
IGEHTPSALAIMENANVLAR
GVVPLAGTNGETTTQGLDGLSER
LQSIGTENTEENRR
ADDGRPFPQVIK
ALANSLAC[CAM]QGK
ELSDIAHR
FSNEEIAMATVTALR
YTPSGQSGAAASESLFISNHAY
VNPC[CAM]IGGVILFHETLYQK
RLQSIGTENTEENRR
ALSDHHVYLEGTLLKPNMVTPGHAC[CAM]TQK
VDKGVVPLAGTNGETTTQGLDGLSER
C[CAM]PLLKPWAL
GDLGIEIPAEK
GVNLPGAAVDLPAVSEKDIQDLK
EATESFASDPILYRPVAVALDTK
LNFSHGTHEYHAETIK
EATESFASDPILYRPVAVALDTKG
LAPITSDPTEAAAVGAVEASFK
GADFLVTEVENGGSLGSK
RFDEILEASDGIMVAR
FGVEQDVDMVFASFIR
EKGADFLVTEVENGGSLGSK
DLPAVSEKDIQDLK
AADVHEVR
NTGIIC[CAM]TIGPASR
VNLAMDVGK
GIFPVLC[CAM]K
IYVDDGLISLQVK
KGVNLPGAAVDLPAVSEK
EAEAAIYHLQLFEELR
MQHLIAR
ITLDNAYMEK
KGVNLPGAAVDLPAVSEKDIQDLK
GVNLPGAAVDLPAVSEK
AEGSDVANAVLDGADC[CAM]IMLSGETAK
GSGTAEVELK
AGKPVIC[CAM]ATQMLESMIK
C[CAM]DENILWLDYK
EATESFASDPILYR
IENHEGVR
PGSGFTNTMR
GSGTAEVELKK
FDEILEASDGIMVAR
RGDLGIEIPAEK
AVLNAWAEDVDLR
GFC[CAM]LPPHC[CAM]SR
GIWHNDNK
LRFPAEDEFPDLSSHNN
VAGDEESYDVFKDLFDPIIEER
TVGAVAGDEESYDVFKDLFDPIIEER
LLIEMEQR
TFLVWINEEDHLR
GGDDLDPNYVLSSR
HGGYQPSDEHKTDLNPDNLQGGDDLDPNYVLSSR
FC[CAM]TGLTQIETLFK
TDLNPDNLQGGDDLDPNYVLSSR
LEQGQAIDDLMPAQK
RGTGGVDTAAVGGVFDVSNADR
LGFSEVELVQMVVDGVK
SMTEAEQQQLIDDHFLFDKPVSPLLLASGMAR
GTGGVDTAAVGGVFDVSNADR
LFDPIIEER
LRFPAEDEFPDLSSHNNHMAK
FPAEDEFPDLSSHNNHMAK
TVGAVAGDEESYDVFK
DVFKDLFDPIIEER
HGGYQPSDEHK
AHVTLGC[CAM]AADVQPVQTGLDLLDILQQVK
AGQVFLEELGNHK
ADFSEAYK
TAGAQVVLTDQELQLWPSDLDKPSASEGLPPGSR
RLDEDLAGYC[CAM]R
KAGQVFLEELGNHK
VLVLDDTNHERER
LDC[CAM]AQLK
ADFSEAYKR
SHTFLPK
HFISGDEPKEK
EKPELQFPFLQDEDTVATLHEC[CAM]K
LSISALFVTPK
LDEDLAGYC[CAM]R
WMLSLTK
AAGAEEYAQQEVVKR
MVSADAYK
NQWQLSADDLK
EKLELVSYFGK
NQWQLSADDLKK
C[CAM]AADVQPVQTGLDLLDILQQVK
AHVTLGC[CAM]AADVQPVQTGLDLLDILQQVKG
HFISGDEPK
AIFTGYYGK
RPPGVLHC[CAM]TTK
AAGAEEYAQQEVVK
VQPVQTGLDLLDILQQVK
AADVQPVQTGLDLLDILQQVK
YQVVLVEPK
VC[CAM]NPIITK
NSLESYAFNMK
EIAEAYLGK
QTQTFTTYSDNQPGVLIQVYEGER
FEELNADLFR
GPAVGIDLGTTYSC[CAM]VGVFQHGK
QATKDAGTIAGLNVLR
RFDDAVVQSDMK
LLQDFFNGK
TTPSYVAFTDTER
IINEPTAAAIAYGLDKK
GTLDPVEK
TVTNAVVTVPAYFNDSQR
MKEIAEAYLGK
MVNHFIAEFK
SINPDEAVAYGAAVQAAILSGDK
NQVAMNPTNTVFDAK
FDDAVVQSDMK
SFYPEEVSSMVLTK
LDKSQIHDIVLVGGSTR
HWPFMVVNDAGRPK
ILDKC[CAM]NEIISWLDK
GC[CAM]DVVVIPAGVPR
ANTFVAELKG
VDFPQDQLATLTGR
NAKVAVLGASGGIGQPLSLLLK
IFGVTTLDIVR
MIAEAIPELK
TIIPLISQC[CAM]TPK
ANTFVAELK
LTLYDIAHTPGVAADLSHIETR
GYLGPEQLPDC[CAM]LK
EGVVEC[CAM]SFVQSK
VAVLGASGGIGQPLSLLLK
AGAGSATLSMAYAGAR
ETEC[CAM]TYFSTPLLLGK
FVFSLVDAMNGK
SGGIGQPLSLLLK
AEPEKSEGAAEEQPEPAPAPEQEAAAPGPAAGGEAPK
AGEASAESTGAADGAAPEEGEAK
AEGAGTEEEGTPK
ESTGAADGAAPEEGEAK
KAEGAGTEEEGTPKESEP
KTEAPAAAGPEAK
SSAEPAPSSKETPAASEAPSSAAK
QLFHPEQLITGKEDAANNYAR
LIGQIVSSITASLR
TIGGGDDSFNTFFSETGAGK
TIQFVDWC[CAM]PTGFK
VGINYQPPTVVPGGDLAK
FVDLEPTVIDEVR
LIGQIVSSITAS
KLADQC[CAM]TGLQGFLVFH
IIDLVLDR
RTIQFVDWC[CAM]PTGFK
DLEPTVIDEVR
KLADQC[CAM]TGLQGF
LADQC[CAM]TGLQGFLVFH
VFVDLEPTVIDEVR
VLETAEDIQER
LIQSHPESAEDLKEK
LSILSEER
REELITNWEQIR
DLAALGDKVNSLGETAQR
LQVASDENYKDPTNLQGK
NQALNTDNYGHDLASVQALQR
HQAFEAELSANQSR
ITALDEFATK
LSDDNTIGQEEIQQR
ELPTAFDYVEFTR
LEESLEYQQFVANVEEEEAWINEK
VNEVSQFAAK
EANQQQQFNR
EANELQQWITEK
ENLLEEQGSIALR
GAC[CAM]AGSEDAVK
GKDLIGVQNLLK
DVDETIGWIK
LGESQTLQQFSR
DLASVQALLR
KLLVSSEDYGR
LDILDQER
EKLDILDQER
GLVSSDELAK
DLIGVQNLLK
NTTGVTEEALK
SLQQLAEER
ALINADELANDVAGAEALLDR
AC[CAM]NC[CAM]LLLK
AVDHINSR
LAMQEFMILPVGAESFR
PSGASTGIYEALELRDGDKQR
MVIGMDVAASEFYR
VNQIGSVTEAIQAC[CAM]K
VGIQIVGDDLTVTNPK
YITGDQLGALYQDFVR
DATNVGDEGGFAPNILENSEALELVK
IAPALISSGISVVEQEK
NYPVVSIEDPFDQDDWAAWSK
LDNLMLELDGTENK
ILENSEALELVK
IVYGHLDDPANQEIER
EHAALEPR
SDFDPGQDTYQHPPKDSSGQR
VAMSHFEPSEYIR
NAVTQEFGPVPDTAR
IHETNLK
VAVPSTIHC[CAM]DHLIEAQVGGEKDLRR
DVGGIVLANAC[CAM]GPC[CAM]IGQWDR
VAVPSTIHC[CAM]DHLIEAQVGGEK
DFAPGKPLK
FNPETDFLTGK
VAGILTVK
FKLEAPDADELPR
EGWPLDIR
VDVSPTSQR
SDFDPGQDTYQHPPK
AKDINQEVYNFLATAGAK
DINQEVYNFLATAGAK
NDANPETHAFVTSPEIVTALAIAGTLK
LEAPDADELPR
LQLLEPFDK
WVVIGDENYGEGSSR
QGLLPLTFADPSDYNK
C[CAM]TTDHISAAGPWLK
DLEDLQILIK
TDIANLAEEFK
KQGLLPLTFADPSDYNK
VGLIGSC[CAM]TNSSYEDMGR
ATIERDGYAQILR
NDANPETHAFVTSPEIVTAL
VAMQDATAQMAMLQFISSGLPK
GHLDNISNNLLIGAINIENGK
AVTQEFGPVPDTAR
VLVVDQLSMR
SLKDFSSSK
HYPYISTR
REPLPSLEAVYLITPSEK
DNALLAQLIQDK
SVHSLISDFKDPPTAK
DIMEDTIEDKLDTK
SYDLLPIENDVYKYETSGIGEAR
AIVPILLDANVSTYDK
YETSGIGEAR
EVLLDEDDDLWIALR
WEVLIGSTHILTPQK
HIAEVSQEVTR
MLSSC[CAM]C[CAM]K
LGVPIVTDSTLR
LAEQIATLC[CAM]ATLK
SYDLLPIENDVYK
MAHLGVPIVTDSTLR
DNALLAQLIQDKLDAYK
AAHVFFTDSC[CAM]PDALFNELVK
EPLPSLEAVYLITPSEK
MTDIMTEGITIVEDINKR
LNKTDEEISS
LIQHAQIPPEDSEIITNMAHLGVPIVTDSTLR
ADDPTMGEGPDK
GFDPSSPVLHELTFQ
GFDPSSPVLHELTFQAM
HYQGTVDK
VEQDLAMGTDAEGEK
RREPLPSLEAVYLITPSEK
NGITEENLNK
FTDSC[CAM]PDALFNELVK
GFDPSSPVLHELTF
KLNKTDEEISS
DIMEDTIEDK
VLPGVDALSNV
LTLDKLDVK
QIVWNGPVGVFEWEAFAR
TGQATVASGIPAGWMGLDC[CAM]GTESSK
ITLPVDFVTADKFDENAK
PAAGTVILLENLR
ALESPERPFLAILGGAK
LGDVYVNDAFGTAHR
VSHVSTGGGASLELLEGK
AHSSMVGVNLPQK
ITLPVDFVTADK
DC[CAM]VGPEVENAC[CAM]ANPAAGTVILLENLR
VDFNVPMK
IQLINNMLDK
VLNNMEIGTSLYDEEGAK
FHVEEEGK
AGTVILLENLR
TGQATVASGIPAGWMGLDC[CAM]GTESSKK
GC[CAM]ITIIGGGDTATC[CAM]C[CAM]AK
NNQITNNQR
ITISDC[CAM]GQL
EGMNIVEAMER
SIYGEKFEDENFILK
NPTVFFDITADDEPLGR
FEDENFILK
VSFELFADKVPK
VSFELFADK
KITISDC[CAM]GQL
TEWLDGK
IIPGFMC[CAM]QGGDFTR
VNPTVFFDITADDEPLGR
FFDITADDEPLGR
VVSSIEQK
YLAEVAAGDDKKG
YLAEVAAGDDKK
FLIPNASQPESK
DIC[CAM]NDVLSLLEK
GIVDQSQQAYQEAFEISK
IETELRDIC[CAM]NDVLSLLEK
TAFDEAIAELDTLSEESYK
YLAEVAAGDDK
SVTEQGAELSNEER
YDDMAAC[CAM]MK
KGIVDQSQQAYQEAFEISK
TAFDEAIAELDTLSEESYKDS
GQC[CAM]GNQIGAKFWEVISDEHGIDPTGSYHGDSDLQLER
YLTVAAIFR
INVYYNEAAGNK
IMNTFSVMPSPK
NVYYNEAAGNKYVPR
KESESC[CAM]DC[CAM]LQGFQLTH
SIDNEALYDIC[CAM]FR
VVFEQTK
FFVGGNWK
VTNGAFTGEISPGMIK
VVLAYEPVWAIGTGK
DLGATWVVLGHSER
IAVAAQNC[CAM]YK
HVFGESDELIGQK
ELASQPDVDGFLVGGASLKPEFVDIINAK
TATPQQAQEVHEK
IIYGGSVTGATC[CAM]K
VSHALAEGLGVIAC[CAM]IGEK
TVIIEQSWGSPK
LSDGVAVLK
AAVEEGIVLGGGC[CAM]ALLR
C[CAM]IPALDSLKPANEDQK
VGLQVVAVK
IGIEIIKR
VGGTSDVEVNEK
APGFGDNR
NAGVEGSLIVEK
IQEITEQLDITTSEYEKEK
ILQSSSEVGYDAMLGDFVNMVEK
GVMLAVDAVIAELKK
ISSVQSIVPALEIANAHRKPLVIIAEDVDGEALSTLVLNR
ISSVQSIVPALEIANAHR
TLNDELEIIEGMK
LVQDVANNTNEEAGDGTTTATVLAR
VGEVIVTK
TALLDAAGVASLL
GYISPYFINTSK
GVMLAVDAVIAELK
IQEITEQLDITTSEYEK
C[CAM]EFQDAYVLLSEK
ALMLQGVDLLADAVAVTMGPK
QFLSETEK
QIEELKGQEVSPK
FSAVALC[CAM]K
LGVAGQWR
FADVLGLEEETLGSVPSPA
MPFPVNHGASSEDSLLQDAAK
NEAIQAAHDSVAQEGQC[CAM]R
THYGSLPQK
TQDENPVVHF
TQDENPVVHFFKN
TGILDSIGR
TPPPSQGK
VDNQHDFQDIASVVALTK
GSHSQSSSPGALTLGR
EMLSSTTYPVVVK
ASTAAPVASPAAPSPGSSGGGGFFSSLSNAVK
VLLVIDEPHTDWAK
QTSQQPAGPPAQQRPPPQGGPPQPGPGPQR
MTQALPR
LGTEEFPLIDQTFYPNHK
VKVDNQHDFQDIASVVALTK
QTTAAAAATFSEQVGGGSGGAGR
TGPPTTQQPRPSG
KLGTEEFPLIDQTFYPNHK
VASPAAPSPGSSGGGGFFSSLSNAVK
VEQAEFSDLNLVAH
QLIVELVVNK
EQVTNVGGAVVTGVTAVAQK
TVEGAGNIAAATGFVK
TKEQVTNVGGAVVTGVTAVAQK
ISGETIFVTAPHEATAGIIGVNRK
DPHLAC[CAM]VAYER
NLQNLLILTAIKADR
NLQNLLILTAIK
LLYNNVSNFGR
PLIDQVVQTALSETQDPEEVSVTVK
VNPSRLPVVIGGLLDVDC[CAM]SEDVIK
ISGETIFVTAPHEATAGIIGVNR
QLPLVKPYLR
ALEHFTDLYDIK
VSQPIEGHAASFAQFK
GQFSTDELVAEVEKR
IAAYLFK
AVNYFSK
LKLLLPWLEAR
AYEFAER
HDVVFLITK
WLKEDKLEC[CAM]SEELGDLVK
TLQIFNIEMK
YESLELC[CAM]RPVLQQGR
NLILVVR
GQFSTDELVAEVEK
KFNALFAQGNYSEAAK
TSIDAYDNFDNISLAQR
HSSLAGC[CAM]QIINYR
VVGAMQLYSVDR
STLVHLGEYQAAVDGAR
GQC[CAM]DLELINVC[CAM]NENSLFK
IAAYLFKG
AHIAQLC[CAM]EK
IHEGC[CAM]EEPATHNALAK
VANVELYYK
LEC[CAM]SEELGDLVK
MEGNAEESTLFC[CAM]FAVR
SVNESLNNLFITEEDYQALR
EVC[CAM]FAC[CAM]VDGK
RPISADSAIMNPASK
LPVVIGGLLDVDC[CAM]SEDVIK
HELIEFR
YIEIYVQK
LDASESLR
KVSQPIEGHAASFAQFK
RDPHLAC[CAM]VAYER
LTDQLPLIIVC[CAM]DR
VVGAMQLYSVDRK
VIQC[CAM]FAETGQVQK
YIQAAC[CAM]K
C[CAM]NEPAVWSQLAK
LEKHELIEFR
VGEQAQVVIIDMNDPSNPIR
ADDPSSYMEVVQAANASGNWEELVK
AHTMTDDVTFWK
ESNC[CAM]YDPER
KDPELWGSVLLESNPYR
YESLELC[CAM]R
ALEHFTDLYDIKR
WLLLTGISAQQNR
ITNVLQNPDLALR
AFMTADLPNELIELLEK
VLQNPDLALR
RPLIDQVVQTALSETQDPEEVSVTVK
KGQVLSVC[CAM]VEEENIIPYITNVLQNPDLALR
KVGYTPDWIFLLR
DAMQYASESK
EDKLEC[CAM]SEELGDLVK
FNALFAQGNYSEAAK
ESYVETELIFALAK
VADAILGNQMFTHYDR
EHLELFWSR
HVGDLGNVTAGK
LAC[CAM]GVIGIAQ
VISLSGEHSIIGR
DGVANVSIEDR
LASVSADAEVAR
EIQGLFEEK
STVSIEEAVAK
VDHGAEIITQSPSR
YVGENISGEVK
VTSEPEAVSER
GYVGENISGEVK
SDTLQISDLLVSESR
VELFGLGITYDQASTK
VADVSISEVTTLLGNVHSPVVEGYVGENISGEVK
STELGSDYYELSDSR
GLSSVPEVAEVEPTTK
TGVIQTSTEQSFSK
LINQPLPDLK
SILTEQLETIPK
SILTEQLETIPKEER
DLATDLSLIEVK
TPGTPGTPSYPR
GGQVQIVTK
FAAPAQPEEER
TTAASGDLAQAPGAFK
EEFVETC[CAM]PGELK
KTTAASGDLAQAPGAFK
ETSPETSLIQDEVALK
IGSTDNIK
VGSLDNAHHVPGGGNVK
ELAGHTGYLSC[CAM]C[CAM]R
AC[CAM]ADATLSQITNNIDPVGR
AGVLAGHDNR
QTFTGHESDINAIC[CAM]FFPNGNAFATGSDDATC[CAM]R
KAC[CAM]ADATLSQITNNIDPVGR
LFVSGAC[CAM]DASAK
LLLAGYDDFNC[CAM]NVWDALK
ADQELMTYSHDNIIC[CAM]GITSVSFSK
VGNLTVVGKESDSVLR
IGADFLGR
LTADFRDDPDPR
INMC[CAM]GLTTK
HIYLLPSGR
NFGLYNER
APPSVFAQVPQAPPVLVFK
NTPIYVSSPTWENHNAVFSAAGFK
ITWSNPPAQGAR
QVEYLVNEK
DYVATSIHEAVTK
KVNLGVGAYR
LVLGDNSLAIR
NLDYVATSIHEAVTK
IVAATLSDPELFK
VGNLTVVGK
VGGVQSLGGTGALR
IANDNSLNHEYLPILGLAEFR
VNLGVGAYR
FLFPFFDSAYQGFASGDLEK
IVAATLSDPELFKEWK
LGIQAEPLYR
ALALVPGTPTR
SIEEAC[CAM]LTLQHLNR
NLISPELGVVFFNVPDKLR
DLAPAPAPAPAPSLPGNLGDGTLSC[CAM]RPEC[CAM]SGELTK
AQWGENLQVTLIPTHDTEVTR
SAPC[CAM]GSLAFSGDR
ESTFLDEGPNEQEITPLQHTPR
WLAESPVGLPPEEEDKLTR
SSRPDTLLSSEQRPGK
GVEQQDGAVPEK
NLISPELGVVFFNVPDK
HTATVSPPTDEAAGEAGLTDESPAGNLPGSSF
NEPTTPSWLAEIPPWVPK
VLVLEDR
LDMYVLNPVKDSK
DLAAGAVPANLKPSK
ATEQKEKELER
VVSNTIEPLTLFHK
SSLLLDTVTSIPSSR
VPEVTESHTTR
AVFQANQENLPILKR
IVEIPFNSTNK
YGTDLSR
ADIGVAMGIVGSDVSK
YHTEIVFAR
AEDVVVGDLVEVK
AVAGDASESALLK
AVFQANQENLPILK
DMTSEELDDILR
TSATWFALSR
KADIGVAMGIVGSDVSK
MSINAEDVVVGDLVEVK
NIAFFSTNC[CAM]VEGTAR
DAFQNAYLELGGLGER
EQPLDEELKDAFQNAYLELGGLGER
C[CAM]SSILLHGK
MTSEELDDILR
DVVVGDLVEVK
RAVAGDASESALLK
DKYEPAAVSEHGDKK
IAATILTSPDLRK
VGAFTVVC[CAM]K
NMGLYGER
TQLVSNLK
PSWGNHTPIFR
DDNGKPYVLPSVR
NLDKEYLPIGGLAEFC[CAM]K
TC[CAM]GFDFSGALEDISK
TQLVSNLKK
FVTVQTISGTGALR
ISVAGVTSGNVGYLAHAIHQVTK
ISVAGVTSGNVGYLAH
EFSVYMTK
SSWWTHVEMGPPDPILGVTEAFK
ASAELALGENNEVLK
MNLGVGAYR
DAGMQLQGYR
KAEAQIAAK
AKEEGSWK
FIWNSEK
VAPPGLTQIPQIQK
TEISFRPNDPK
AYGENIGYSEK
GDINHER
YNPNVLPVQC[CAM]TGK
C[CAM]IEEAIDKLSK
KDPNKLVLC[CAM]EVFK
AYDPKGGLDNAR
LVLC[CAM]EVFK
RPSANC[CAM]DPYAVTEAIVR
TLDC[CAM]EPK
RLTGFHETSNINDFSAGVANR
VQAMYIWVDGTGEGLR
TC[CAM]LLNETGDEPFQYKN
ITGTNAEVMPAQWEFQIGPC[CAM]EGIR
YIWVDGTGEGLR
TC[CAM]LLNETGDEPFQYK
QMYMSLPQGEK
VC[CAM]EDFGVIATFDPK
LYEQLSGK
YNLGAPVAGTC[CAM]YQAEWDDYVPK
VDYAGVTVDELGK
YVWLVYEQEQPLSC[CAM]DEPILSNK
VLTPTQVMNRPSSISWDGLDPGK
GNDISSGTVLSDYVGSGPPSGTGLHR
SQGTALEK
EKMDLTAK
EVGVYEALKDDSWLK
LGVTADDVK
ETAFEFLSSA
NVIIWGNHSSTQYPDVNHAK
EVGVYEALK
VIVVGNPANTNC[CAM]LTASK
KLSSAMSAAK
LQILHIHTAR
AESLQVTR
SQLSC[CAM]VVVDDIER
YIFTLR
VLDDGELLVQQTKN
VFPPEIVEQMGC[CAM]K
FSGAELEGLVR
VEVDMEKAESLQVTR
LLDYVPIGPR
NFSGAELEGLVR
IEVGLVVGNSQVAFEK
VLDDGELLVQQTK
IAEESNFPFIK
AENSSLNLIGK
YVGESEANIR
TPLVSVLLEGPPHSGK
MEIGLPDEK
THPSVVPGC[CAM]IAF
DIEAMDPSILK
GHQLLSADVDIK
TTIAQQVK
GILLYGPPGC[CAM]GK
GSMAGSTGVHDTVVNQLLSK
LLIIGTTSR
MIGFSETAK
KLFADAEEEQR
LFADAEEEQR
THPSVVPGC[CAM]IAFSLPQR
MGIGGLDKEFSDIFR
NIDSNPYDTDK
EEGASPLDFD
KLLIIGTTSR
QSIINPDWNFEK
VVNGPEILNK
C[CAM]PTDELSLSNC[CAM]AVVNEK
NSDRTPLVSVLLEGPPHSGK
GDFLASLENDIK
AAQSTAMNR
KEC[CAM]ENC[CAM]DC[CAM]LQGFQLTHSLGGGTGSGMGTLLISK
PSGNYVGDSDLQLER
YLTVATVFR
SGAFGHLFRPDNFIFGQSGAGNNWAKG
MSSTFIGNSTAIQELFK
EVDEQMLAIQSK
FWEVISDEHGIDPSGNYVGDSDLQLER
ISVYYNEASSHK
LATPTYGDLNHLVSATMSGVTTSLR
LHFFMPGFAPLTAR
VAVC[CAM]DIPPR
C[CAM]STILVQGK
FDTDELNFPTEK
LDWDDRTTNDLEDSYGQEWTYEQR
C[CAM]IELSC[CAM]GSVR
IISSHGC[CAM]K
TTNDLEDSYGQEWTYEQR
EDSPQSHVLVMK
EIPLDKEMQDAFQNAYMELGGLGER
VLGFC[CAM]QLNLPSGK
SPEFTHENPLETR
DTAGDASESALLK
AGQENISVSK
SPTWTALSR
KYQVDLSK
GFKFDTDELNFPTEK
KADIGIAMGISGSDVSK
AC[CAM]VVHGSDLKDMTSEQLDEILR
AEEVVVGDLVEVK
EVVVGDLVEVK
MQINAEEVVVGDLVEVK
NIC[CAM]FFSTNC[CAM]VEGTAR
RDTAGDASESALLK
ADIGIAMGISGSDVSK
LIC[CAM]C[CAM]DILDVLDK
IISSIEQKEENKGGEDK
AAFDDAIAELDTLSEESYK
EAAENSLVAYK
YLAEFATGNDRK
YLAEFATGNDR
HLIPAANTGESK
VAGMDVELTVEER
YYLDSLDR
YYLDSLDRIGAGDYQPTEQDILR
NLKEDGISAAKDVK
SPLTIC[CAM]FPEYPGSNTYEDAAAYIQTQFESK
GDSGIQEC[CAM]FNR
LWGDSGIQEC[CAM]FNR
IIHEDGFSGEDVK
QYKPVVYSNTIQSLAAIVR
MVC[CAM]DVVSR
AMDTLGVEYGDKER
MEDTEPFSAELLSAMMR
AMDTLGVEYGDK
TIQSLAAIVR
QALNEIETR
KFVEVMTEYNATQSK
TKQELEDLTADIK
IEYNVEHSVDYVER
LAIFTDDIK
AIEQSIEQEEGLNR
TTTNEELEDMLESGK
LSEDVEQVK
QHSAILAAPNPDEK
GISPVPINLR
SSVLENFVGRDFLPR
VLNQQLTNHIR
YMLSVDNLK
MGTPYLQK
LQSQLLSIEK
NLVDSYMAIVNK
VPVGDQPPDIEFQIR
SPTSSPTPQR
GYIGVVNR
TSGNQDEILVIR
GMEDLIPLVNR
VYSPHVLNLTLVDLPGMTK
LQDAFSAIGQNADLDLPQIAVVGGQSAGK
HIFALFNTEQR
FTDFEEVR
DMLMQFVTK
RIEGSGDQIDTYELSGGAR
LEIEAETDR
ENC[CAM]LILAVSPANSDLANSDALK
QLELAC[CAM]ETQEEVDSWK
IEGSGDQIDTYELSGGAR
LEIEAETDRVTGTNK
KTSGNQDEILVIR
LQSQLLSIEKEVDEYK
KGWLTINNIGIMK
IVTTHIR
TGLFTPDMAFETIVK
SAIGQNADLDLPQIAVVGGQSAGK
KYMLSVDNLK
RSPTSSPTPQR
TDDYLDQPC[CAM]LETINR
NPYYGGESSSITPLEELYKR
SPYLYPLYGLGELPQGFAR
YIAIASTTVETAEPEKEVEPALELLEPIDQK
FDLGQDVIDFTGHALALYR
FLVFVANFDENDPK
KFDLGQDVIDFTGHALALYR
DWNVDLIPK
VVEGSFVYK
FQILEGPPESMGR
MLLYTEVTR
KQNDVFGEADQ
QLIC[CAM]DPSYIPDR
TFEGVDPQNTSMR
EVEPALELLEPIDQK
NPYYGGESSSITPLEELYK
NVDKNDEAEYVC[CAM]IAENK
FFLC[CAM]QVAGDAK
LQVDIVPSQGEISVGESK
ALASEWKPEIR
IGQESLEFILVQADTPSSPSIDR
GLGEISAATEFK
APTPQEFKEGEDAVIVC[CAM]DVVSSLPPTIIWK
DGEPIENEEEDDEKHIFSDDSSELTIR
IIAEGANGPTTPEADKIFLER
TAAYVNAIEK
C[CAM]AVVDVPFGGAK
ISGASEKDIVHSGLAYTMER
MVEGFFDR
HGGTIPVVPTAEFQDR
GASIVEDKLVEDLK
SEAAADREDDPNFFK
VYEGSILEADC[CAM]DILIPAASEK
ALASLMTYK
GASIVEDK
KGFIGPGIDVPAPDMSTGER
YNLGLDLR
YSTDVSVDEVK
DIVHSGLAYTMER
TFVVQGFGNVGLHSMR
DDGSWEVIEGYR
GFIGPGIDVPAPDMSTGER
RDDGSWEVIEGYR
C[CAM]VGVGESDGSIWNPDGIDPK
QLITDLVISK
SSANEDEAKAETIR
ATSAASPGPER
TSISGNWK
TPALSPQRPLT
ILGDYDIK
QHAFGMAENEDFR
VLLVVDEPHTDWAK
SAGLVDAPAPSAASR
SFRPDFVLIR
EMLTLPTFPVVVK
TPALSPQRPLTTQQPQSGTLKEPDSSK
RPPPAQAPAPQPAPQPAPTPSVGSSFFSSLSQAVK
QTAASAGLVDAPAPSAASR
TPALSPQRPLTTQQPQSGTLK
FPLIEQTYYPNHR
DGKDYIFEVMDC[CAM]SMPLIGEHQVEDR
VFSVLREESESVLTLK
YENNVMNIR
GLTPTGMLPSGVLSGGK
ITSFEEAK
ITSFEEAKGLD
IITEGASILR
DAMPSDANLNSINK
LEESVALR
FKEPPAYGPMC[CAM]DILWSDPLEDFGNEK
QTLQSATVEAIEADEAIK
TQEHFTHNTVR
EQALAVSR
SGQVLEVSGSK
NFITQGPYENR
TSC[CAM]EFTGDILR
SAIGEGMTR
KTSC[CAM]EFTGDILR
TVSGVNGPLVILDHVK
LALTTAEFLAYQC[CAM]EK
YAEIVHLTLPDGTK
KDHADVSNQLYAC[CAM]YAIGK
YAEIVHLTLPDGTKR
HVLVILTDMSSYAEALR
IPIFSAAGLPHNEIAAQIC[CAM]R
TPVSEDMLGR
TVYETLDIGWQLLR
AVVGEEALTSDDLLYLEFLQK
QIYPPINVLPSLSR
AVVQVFEGTSGIDAK
IPQSTLSEFYPR
RIPQSTLSEFYPR
IYPEEMIQTGISAIDGMNSIAR
GFPGYMYTDLATIYER
RYADLTEDQLPSC[CAM]ESLKDTIAR
HYGGLTGLNK
YADLTEDQLPSC[CAM]ESLKDTIAR
ALPFWNEEIVPQIK
FSGWYDADLSPAGHEEAK
HGESAWNLENR
NLKPIKPMQFLGDEETVR
SYDVPPPPMEPDHPFYSNISK
AMEAVAAQGK
YADLTEDQLPSC[CAM]ESLK
RGTGGVDTAATGSVFDISNLDR
LYPPSAEYPDLRK
VVVDALSGLKG
VVVDALSGLKGDLAGR
TTPTGWTLDQC[CAM]IQTGVDNPGHPFIK
GTGGVDTAATGSVFDISNLDR
LYPPSAEYPDLR
SFLIWVNEEDHTR
HTTDLDASK
RLPASDGLDLSQAAAR
FANLNEQAAR
QILELEER
AQALLERDGLAEEVQR
NLQSAEEWYK
DVDGATLAR
VGEGFEETLGEAVISTK
ILSSTASK
AQYESLAAK
VESLLDELAFVR
SNVASTAAC[CAM]SSASSLGLGLAYR
TIEIEGLR
LPASDGLDLSQAAAR
LSGPGGSGSFR
ALEAELAALR
VGELFQR
FAVFIEK
KVESLLDELAFVR
AQLEEASSAR
GANESLER
DASVAEAWLLGQEPYLSSR
QNLLSQSHAYQQFLR
SALPAQSAATLPAR
IDDIFER
QLWGLLIEETEKR
QLQEDAAR
EAEKLESEHPDQAQAILSR
ALVADSHPESER
FATDGEGYKPC[CAM]DPQVIR
VQAVVAVAR
HALVEADIAIQAER
SLLDAC[CAM]EGR
EVDDLEQWIAER
LILEVHQFSR
TQTAIASEDMPNTLTEAEK
TQILAASYELHK
AFEDEMSGR
VLLLSQDYGK
HQILEQAVEDYAETVHQLSK
LTTLELLEVR
FESLEPEMNNQASR
ILSSDDYGKDLTSVMR
EIEELQSQAQALSQEGK
INAVVETGR
LVSDGNINSDR
AQTLPTSVVTITSESSPGKR
LLEVLSGER
SQNIITDSSSLNAEAIR
LQALDTGWNELHK
LLDPEDISVDHPDEK
LAEISDVWEEMK
EQWANLEQLSAIR
LLTQHENIKNEIDNYEEDYQK
HLLGVEDLLQK
VLDNAIETEK
ETWLSENQR
DLDDFQSWLSR
DVEDEILWVGER
TAGYPNVNIHNFTTSWR
QALQDTLALYK
EIGQSVDEVEK
FMELLEPLSER
LVSQDNFGFDLPAVEAATK
FQIQDISVETEDNKEK
VIESTQDLGNDLAGVMALQR
VAVVNQIAR
DQNTVETLQR
GNLEVLLFTIQSK
DTGNIGQER
KHEAIETDIAAYEER
LDQPMTEIVSR
YFLVGAGAIGC[CAM]ELLK
NIILGGVK
GNVQVVIPFLTESYSSSQDPPEK
NGSEADIDESLYSR
QKYFLVGAGAIGC[CAM]ELLK
IHVSDQELQSANASVDDSR
LAYVAAGDLAPINAFIGGLAAQEVMK
AVTLHDQGTTQWADLSSQFYLR
AAVASLLQSVQVPEFTPK
LAGTQPLEVLEAVQR
ATLPSPDKLPGFK
NEEDATELVGLAQAVNAR
KPLLESGTLGTK
IYDDDFFQNLDGVANALDNIDAR
IHVSDQELQSANASVDDSRLEELK
NFPNAIEHTLQWAR
DNPGVVTC[CAM]LDEAR
YDGQVAVFGSDFQEK
QPAENVNQYLTDSK
GPQYGSLER
AYAQQLTDWAKR
TEQSVTPEQQK
KAEGATLSNATGAVESTSQAGDR
GADAQEDLR
NLILAPGEDGR
LTVSWLKDDEPLYIGNR
DNILIEC[CAM]EAK
YVVGQTPVYVPYEIR
EVAGDTIIFR
FGTALSNR
LDC[CAM]PFFGSPIPTLR
KEDQGIYTC[CAM]VATNILGK
TRLDC[CAM]PFFGSPIPTLR
SGTLVIDFR
DLELTDLAER
VIAVNEVGSSHPSLPSER
FWEVISDEHGIDPTGTYHGDSDLQLER
GHYTEGAELVDAVLDVVRK
GHYTEGAELVDAVLDVVR
YLTVAAVFR
EVDEQMLSVQSK
MAATFIGNSTAIQELFK
INVYYNEATGGNYVPR
ELEEIVQPIISK
KSDIDEIVLVGGSTR
IINEPTAAAIAYGLDKR
DAGTIAGLNVMR
TFAPEEISAMVLTK
KKELEEIVQPIISK
FEELNMDLFR
LAGESESNLR
ELQELVQYPVEHPDKFLK
LADDVDLEQVANETHGHVGADLAALC[CAM]SEAALQAIR
FDREVDIGIPDATGR
GVLFYGPPGC[CAM]GK
EAVC[CAM]IVLSDDTC[CAM]SDEK
IVSQLLTLMDGLK
EVDIGIPDATGR
QAAPC[CAM]VLFFDELDSIAK
LDQLIYIPLPDEK
ETVVEVPQVTWEDIGGLEDVKR
GILLYGPPGTGK
DVDLEFLAK
LGDVISIQPC[CAM]PDVK
WALSQSNPSALR
MDELQLFR
VINQILTEMDGMSTK
VLFFDELDSIAK
AIANEC[CAM]QANFISIK
NAPAIIFIDELDAIAPK
VVDSLQLTGTKPVATPVDWK
PGGLLLGDEAPNFEANTTIGR
NFDEILR
LPFPIIDDK
LSILYPATTGR
KGESVMVVPTLSEEEAK
DFTPVC[CAM]TTELGR
VVFIFGPDK
DLAILLGMLDPVEK
GVNVSALSR
LASFYER
TALVANTSNMPVAAR
YSNSDVIIYVGC[CAM]GER
FKDPVKDGEAK
LEGDMATIQVYEETSGVSVGDPVLR
EASIYTGITLSEYFR
VLDALFPC[CAM]VQGGTTAIPGAFGC[CAM]GK
LIKDDFLQQNGYTPYDR
VGSHITGGDIYGIVNENSLIK
LPANHPLLTGQR
ITWSIIR
FSMVQVWPVR
VGHSELVGEIIR
ALDEYYDKHFTEFVPLR
EILQEEEDLAEIVQLVGK
GNEMSEVLR
RAVETTAQSDNK
ASLAETDKITLEVAK
LAEMPADSGYPAYLGAR
ADYAQLLEDMQNAFR
AKEILQEEEDLAEIVQLVGK
DFPELTMEVDGK
IKADYAQLLEDMQNAFR
DIKWEFIPSK
SADC[CAM]SVEEEPWKRE
NLFPENLVQAC[CAM]FQQIQTVTKK
TSVNVVGDSFGAGIVYHLSK
NDEVSSLDAFLDLIR
TQSIYDDKNHR
SELDTIDSQHR
C[CAM]LEDNLGIDKR
SADC[CAM]SVEEEPWKR
NLFPENLVQAC[CAM]FQQIQTVTK
SADC[CAM]SVEEEPWK
TQSIYDDK
ESNSNQC[CAM]VYAAHNSVVIDEC[CAM]K
MHDSHLSSDEPK
AC[CAM]FQQIQTVTK
DVNAAIAAIK
LISQIVSSITASLR
RSIQFVDWC[CAM]PTGFK
TIGGGDDSFTTFFC[CAM]ETGAGK
SIQFVDWC[CAM]PTGFK
LISQIVSSITAS
PTVIDEIR
LSDQC[CAM]TGLQGFLVFH
TKEQASHLGGAVFSGAGNIAAATGLVK
IAAATGLVK
RLQQTQAQVDEVVDIMR
LQQTQAQVDEVVDIMR
FTGSEIR
IQEVDAQMLR
RIPLAEWESR
EVESIGAHLNAYSTR
TATFAQALQSVPETQVSILDNGLR
IPLAEWESR
YFYDQC[CAM]PAVAGYGPIEQLPDYNR
TDLTDYLNR
SGMFWLR
NALVSHLDGTTPVC[CAM]EDIGR
MVLAAAGGVEHQQLLDLAQK
VVELLADIVQNSSLEDSQIEK
LC[CAM]TSATESEVTR
VYEEDAVPGLTPC[CAM]R
VVELLADIVQNSSLEDSQIEKER
IAEFAFEYAR
EVAENC[CAM]KDIK
LITEEASKR
AGGVQTVTLIPGDGIGPEISASVMK
TPYTDVNIVTIR
TPIAAGHPSMNLLLR
ENTEGEYSGIEHVIVDGVVQSIK
WMIPPEAK
NVTAIQGPGGK
MSDGLFLQK
LITEEASK
C[CAM]SDFTEEIC[CAM]R
SNVTAVHK
C[CAM]LEEVEDLIVK
GNYLVDVDGNR
QLNTIQNAEAVHFFC[CAM]NYEESR
KHGC[CAM]AFLVDEVQTGGGC[CAM]TGK
TLLTGLLDLQAQYPQFISR
HGC[CAM]AFLVDEVQTGGGC[CAM]TGK
GVVLGGC[CAM]GDK
VDIEFDYDGPLMK
TVAGIIVEPIQSEGGDNHASDDFFR
MLDLYSQISSVPIGYNHPALAK
TMGC[CAM]LATTHSK
IFNTWLGDPSK
IDIPSFDWPIAPFPR
REDLLNNVAR
GTFC[CAM]SFDTPDEAIR
LKYPLEEFTTDNQQEEAR
LQESLMSVAPR
NLLLAEVINIIK
ALYEQEIR
AQLQDLNDR
SAYSSYSAPVSSSLSVR
VHELEQQNK
GADEAALAR
RIDSLMDEIAFLK
AKTLEIEAC[CAM]R
IDSLMDEIAFLK
FTVLTESAAK
YEEEVLSR
VLEAELLVLR
LAAEDATNEK
IQGLTVEQAEAVVR
AKEALELTDTGLLSGSEER
AATSPALFNR
FLSDPQVHTVLVER
SLLQALNEVK
VQVALEELQDLK
TLINELVK
IFVFEPPPGVK
KFLSDPQVHTVLVER
SAC[CAM]DTVDTWLDDTAKGR
FTQDTQPHYIYSPR
GKEIVLSAGSTPK
LQGEFQLR
C[CAM]YLTMTQALEAR
ADLAAVEAK
SRQELEQHSVDTASTSDAVTFITYVQSLK
LALESIC[CAM]LLLGESTTDWK
TFSEILNR
YEFGESDLR
IQFVGAC[CAM]NPPTDPGR
DLPPVSGSIIWAK
EAIVNSC[CAM]VFVHQTLHQANAR
FYFVGDEDLLEIIGNSK
SNSLAFIK
ANEVEQMIR
QLQNISQAAASGGAK
ITNQVIYLNPPIEEC[CAM]R
LEGVEGVAHIIDPK
ESPEVLLTLDILK
VAEVLFDAADANAIEEVNLAYENVK
EYQTQLIQR
TVENIKDPLFR
FYFDPK
LLNTFLER
TFDHYC[CAM]EYR
ILDDDTIITTLENLKR
VTDFGDKVEDPTFLNQLQSGVNR
LFLTMEINPK
ASLAC[CAM]GPMVK
VDDLLIIEEK
TTDLLTDWEK
TSAPITC[CAM]ELLNK
SAC[CAM]DTVDTWLDDTAK
VLLTTQGVDMISK
TYAEPLTAAMVEFYTMSQER
FGNPLLVQDVESYDPVLNPVLNR
LGGSPFGPAGTGK
LAETVFNFQEK
VAAPDVVVPTLDTVR
AVDDLNLHSYSNLPIWVNK
TFSSIPVSR
LNTQEIFDDWAR
SSLQSQC[CAM]LNEVLK
QNLDGLLNQLK
MLSAVSQQVQC[CAM]IQEALR
ILDDDTIITTLENLK
DLFQVAFNR
IMFEVQDLK
APVIDADKPVSSQLR
VMSQEIQEQLHK
WAIAQLNYADMLK
ALGEYLER
VNFLPEIITLSK
WFTSQVIR
EALELTDTGLLSGSEER
GTVGEPTYDAEFQHFLR
YATLATVSR
LSC[CAM]LPAFK
VETGVLKPGMVVTFAPVNVTTEVK
QTVAVGVIK
YYVTIIDAPGHR
DGSASGTTLLEALDC[CAM]ILPPTRPTDKPLR
APVNVTTEVK
KDGSASGTTLLEALDC[CAM]ILPPTRPTDKPLR
MDSTEPPYSQK
AVEEVITISK
SNEKEQLQGLNDR
VSGSPSSGFR
LTEAAEQNK
QASHAQLGDAYDQEIR
VQSLQDEVAFLR
FSTFSGSITGPLYTHR
EIEAEIQALR
YEGSGDGGAAAQSLYIANHAY
ISDRTPSALAILENANVLAR
TPSALAILENANVLAR
GILAADESVGSMAK
ALQASALNAWR
LSQIGVENTEENRR
GVVPLAGTDGETTTQGLDGLLER
DNAGAATEEFIK
QVLFSADDR
VDKGVVPLAGTDGETTTQGLDGLLER
YSPEEIAMATVTALR
DNAGAATEEFIKR
PHSYPALSAEQK
LSQIGVENTEENR
FIIPQIVK
LKDDEVAQLRK
SLADELALVDVLEDK
VIGSGC[CAM]NLDSAR
IVVVTAGVR
SADTLWDIQK
MVVDSAYEVIK
LIASVADDEAAVPNNK
IVADKDYSVTANSK
KSADTLWDIQK
SLADELALVDVLEDKLK
LKGEMMDLQHGSLFLQTPK
FYEQFSK
ELHINLIPSKQDR
HIYFITGETK
HNDDEQYAWESSAGGSFTVR
TDTGEPMGR
TKPIWTRNPDDITNEEYGEFYK
YESLTDPSKLDSGK
VFIMDNC[CAM]EELIPEYLNFIR
ALLFVPR
HLEINPDHSIIETLR
SLTNDWEEHLAVK
ELISNSSDALDK
KHLEINPDHSIIETLR
ELISNSSDALDKIR
APFDLFENR
NPDDITNEEYGEFYK
HSQFIGYPITLFVEK
LVTSPC[CAM]C[CAM]IVTSTYGWTANMER
DQVANSAFVER
RAPFDLFENR
YYTSASGDEMVSLK
ADHGEPIGR
SIYYITGESK
ALLFIPR
ELKIDIIPNPQER
MAKKHLEINPDHPIVETLR
LVSSPC[CAM]C[CAM]IVTSTYGWTANMER
KHLEINPDHPIVETLR
ELISNASDALDK
GFEVVYMTEPIDEYC[CAM]VQQLK
HLEINPDHPIVETLR
SLTNDWEDHLAVK
VFIMDSC[CAM]DELIPEYLNFIR
IDIIPNPQER
NPDDITQEEYGEFYK
YHTSQSGDEMTSLSEYVSR
LGLGIDEDEVTAEEPSAAVPDEIPPLEGDEDASR
EQVANSAFVER
HSQFIGYPITLYLEK
RAPFDLFENK
AVLFC[CAM]LSEDKKN
KEDLVFIFWAPENAPLK
YALYDATYETK
LGGSAVISLEGKPL
AVLFC[CAM]LSEDKK
MLPDKDC[CAM]R
NIILEEGKEILVGDVGQTVDDPYTTFVK
EILVGDVGQTVDDPYTTFVK
HELQANC[CAM]YEEVKDR
SSTPEEVK
AVLFC[CAM]LSEDK
FSMVIDNGIVK
GVLFGVPGAFTPGC[CAM]SK
LLADPTGAFGK
VNLAELFK
THLPGFVEQAGALK
ATDLLLDDSLVSLFGNRR
VGDAIPSVEVFEGEPGKK
VGDAIPSVEVFEGEPGK
ALNVEPDGTGLTC[CAM]SLAPNILSQL
ATDLLLDDSLVSLFGNR
KVNLAELFK
KGVLFGVPGAFTPGC[CAM]SK
AWGNNQDGVVASQPAR
RADQLADESLESTR
TLVMLDEQGEQLER
TRIDEANQR
VTNDARENEMDENLEQVSGIIGNLR
IEEGMDQINK
LASLSEKPPAIDWAYYR
ANVAKPGLVDDFEK
SC[CAM]AEFVSGSQLR
YTALVDQEEKEDVK
NLFTQTLGLGSQK
LLDELTLEGVTR
KHPEPFFALAK
EHANIDAQSGSQAPNPSTTISPGK
SPSTGLYANLEK
VAGLEPQDLVEAHGTFYTSHC[CAM]VNTSC[CAM]R
C[CAM]YTQNIDTLER
IGGHGAEYGAEALER
VDPVNFK
TYFPHFDVSHGSAQVK
FLASVSTVLTSK
TVMDDFAQFLDTC[CAM]C[CAM]K
AADKDTC[CAM]FSTEGPNLVTR
EC[CAM]C[CAM]HGDLLEC[CAM]ADDR
LPC[CAM]VEDYLSAILNR
YMC[CAM]ENQATISSK
ENYGELADC[CAM]C[CAM]TK
GLVLIAFSQYLQK
LVQEVTDFAK
APQVSTPTLVEAAR
RPC[CAM]FSALTVDETYVPK
EGDGSATTDAAPATSPK
QDEGKEDPEADQEHA
KGEGDAAPSEEK
IQDKEGIPPDQQR
EGIPPDQQR
TITLEVEPSDTIENVK
DC[CAM]HVIDGK
LESEGANEGATAAPELSALEEAFR
TITFEQFQEALEELAK
APVISGVTK
NVTVTDVDIVFSK
VDLVDESGYVPGYK
LSLESEGANEGATAAPELSALEEAFR
FLPLFDR
VLLPEYGGTK
VFEGNRPTNSIVFTK
LRELFEADPER
KIEPELEGSSAVTSHDSSTNGLISFIK
MIPC[CAM]DFLIPVQTQHPIR
VWFVSNIDGTHIAK
EVMQMLVELAK
TLASLSPETSLFIIASK
ELFEADPER
TFTTQETITNAETAK
HFVALSTNTAK
ILLANFLAQTEALMK
LAPEYEAAATR
DLFSDGHSEFLK
YGVSGYPTLK
FISDKDASVVGFFR
TFSHELSDFGLESTTGEVPVVAIR
ALEQFLQEYFDGNLK
FAHTNIESLVK
LSKDPNIVIAK
YLAEVATGEK
DNLTLWTSDQQDDDGGEGNN
YLAEVATGEKR
RATVVESSEK
NC[CAM]SETQYESK
ELEAVC[CAM]QDVLSLLDNYLIK
TAFDDAIAELDTLNEDSYK
NVTELNEPLSNEER
ATVVESSEK
YEVSISAVR
LILNYSPR
LYPATEYEISLNSVR
YGLVGGEGGK
ELIVDAEDTWIR
GLC[CAM]VDGEC[CAM]VC[CAM]EEPYTGEDC[CAM]R
LEGLSENTDYTVLLQAAQEATR
VDFILLK
DSLTVSWSSPVAPFDYYR
GVC[CAM]VDGQC[CAM]IC[CAM]DSEYSGDDC[CAM]SELR
TVTEFAITR
FAVEDSR
DVSDTVAFVEWTPPR
VVYSTLAGEQYHEVLVPK
VATHLSTPQGLQFK
LDSSVVPNTVTEFAITR
AAIENYVLTYK
ITFTPSSGISSEVTVPR
SPPTSASVSTVIDGPTQILVR
GHEFSIPFVEMK
SSLTSTVFTTGGR
LTVVILEAK
NTLNPYYNESFSFEVPFEQIQK
MDVGGLSDPYVK
VFLLPDK
KMDVGGLSDPYVK
VPMNTVDFGHVTEEWR
VFVGYNSTGAELR
VPYSELGGK
TLNPVFNEQFTFK
TLVMAVYDFDR
LGDIC[CAM]FSLR
HDIIGEFK
DLQSAEKEEQEK
VQVVVTVLDYDK
HWSDMLANPR
KTLNPVFNEQFTFK
TNEAQAIETAR
YFHVVIAGPQDSPFEGGTFK
WSPALQIR
LELFLPEEYPMAAPK
LLAEPVPGIK
IC[CAM]LDILK
VLELDNVK
AISHEHSPSDLEAHFVPLVK
MAGDPVANVR
LNIISNLDC[CAM]VNEVIGIR
NLC[CAM]SDDTPMVR
YMVADKFTELQK
VKEFC[CAM]ENLSADC[CAM]R
SEIIPMFSNLASDEQDSVR
IGPILDNSTLQSEVKPILEK
LAGGDWFTSR
DNTIEHLLPLFLAQLKDEC[CAM]PEVR
LTQDQDVDVK
TDLVPAFQNLMK
ELVSDANQHVK
VLAMSGDPNYLHR
LSTIALALGVER
YFAQEALTVLSLA
TSAC[CAM]GLFSVC[CAM]YPR
QLSQSLLPAIVELAEDAK
ENVIMTQILPC[CAM]IK
SALASVIMGLSPILGK
DC[CAM]EAEVR
EFC[CAM]ENLSADC[CAM]R
FIPLIPIPER
DGEYVVEVR
VTVTNPDTGR
AHSDGGDGVVSQVK
TDGAAPNVAPSDVGGGGGTNR
IVESYQIR
KVLEPMPSTAEISTSGAVLK
VLEPMPSTAEISTSGAVLK
AVDLIPWMEYEFR
IFNIQLEDEGLYEC[CAM]EAENIR
WLLNEFPVFITMDK
VAPSDVGGGGGTNR
TTKPYPADIVVQFK
ELTITWAPLSR
ATSVALTWSR
VQVTSQEYSAR
IKTDGAAPNVAPSDVGGGGGTNR
IGSLDNITHVPGGGNK
HLSNVSSTGSIDMVDSPQLATLADEVSASLAK
HVPGGGSVQIVYKPVDLSK
LDLSNVQSK
LQTAPVPMPDLK
SGYSSPGSPGTPGSR
SPVVSGDTSPR
LAVSQVPR
AVELAANTK
ILTVEDHYYEGGIGEAVSAAVVGEPGVTVTR
SGKPAELLK
NMAEQIIQEIYSQVQSK
C[CAM]EAFGWHTIIVDGHSVEELC[CAM]K
ISSDLDGHPVPK
TSRPENAIIYSNNEDFQVGQAK
SVPMSTVFYPSDGVATEK
IIALDGDTK
VLDPFTIKPLDR
NSTFSELFK
MFGIDKDAIVQAVK
ILATPPQEDAPSVDIANIR
LGQSDPAPLQHQVDIYQK
LDNLVAIFDINR
HQPTAIIAK
SC[CAM]FQPLFR
TASLTSAASIDGSR
FGDMQEIIQNFVR
YALNHPDTVEGLVLINIDPNAK
GIIQHAPNLENIELYWNSYNNR
LDPTQTSFLK
QITVNDLPVGR
GLFIIDAKG
SAPDFTATAVVDGAFK
SLSQNYGVLK
KEGGLGPLNIPLLADVTK
EGGLGPLNIPLLADVTK
VLQETILVEER
GEEVDQSAPEQEQPATVSHEEEQASTIR
GISQTNLITTVTPEK
DSVSAAEVGTGQYATTK
ASALIDRPAPYFER
AVADALNR
ATGPAPGPSVDRETVAAPGR
YSEATEHPGAPPQPPAPLQPALAPPSR
SEGHEEKPLPPAQSQTQEGGPAAGK
TEGHEETPLPPAQSQTQEGGPAAGK
ATGPAPGPSVDR
ADIAVPLVFTK
AVAIETQPAQGESDAVAR
DPEGAGGAGVLAAGK
SEYQPSDAPFER
DLGPVAPAPIK
SIPHITSDR
IINDDQSFYADVYLEDGLIK
STVEYNIFEGMEC[CAM]HGSPLVVISQGK
KPFPEHLYQR
HQPPPIR
SAADIIALAR
IVFEDGNISVSK
SLSGAQIDDNNPR
NLHQSNFSLSGAQIDDNNPR
IAVGSDADVVIWDPDKMK
GMYDGPVYEVPATPK
EELEVLVQDK
ALSRPEELEAEAVFR
LGANSLLDLVVFGR
AAFGLSEAGFNTAC[CAM]LTK
GVIALC[CAM]IEDGSIHR
VTLEYRPVIDK
VSDAISTQYPVVDHEFDAVVVGAGGAGLR
SMTLEIR
TYFSC[CAM]TSAHTSTGDGTAMVTR
TLNEADC[CAM]ATVPPAIR
SLLDLVVFGR
ISQLYGDLK
VDEYDYSKPIQGQQK
NTVIATGGYGR
VGSVLQEGC[CAM]EK
GEGGILINSQGER
ANAGEESVMNLDK
SLTAVLSAELNK
TSVVDLLYWR
ESLTEVSETVTQHK
EFVWNPR
INAANIATDDER
LATPGLMIRPK
FLNVTPNVEVNVEC[CAM]R
SC[CAM]GQVVEEWK
INAANIATDDERDK
QAASSLQQASLK
NAVITVPAYFNDSQR
QAVTNPNNTFYATK
TIAPC[CAM]QK
SQVFSTAADGQTQVEIK
STNGDTFLGGEDFDQALLR
LLGQFTLIGIPPAPR
TTPSVVAFTADGER
YAEEDRR
DAGQISGLNVLR
AQFEGIVTDLIK
VQQTVQDLFGR
VINEPTAAALAYGLDK
SDIGEVILVGGMTR
VINEPTAAALAYGLDKSEDK
LNQNLNDVLVSLEK
ADETKDEQFEQC[CAM]VQNFNK
LVDQALLTMDTYLGQFPDIK
VNHEPEPASGASPGATIPK
LASSLTTK
IIENLHDVAYK
NALANPLYC[CAM]PDYR
IIENLHDVAYKNALANPLYC[CAM]PDYR
WEVAALR
QVAEQFLNMR
YEDSNNLGTSHLLR
TSAAPGGVPLQPQDLEFTK
AVAQGNLSSADVQAAK
GNNTTSLLSQSVAK
AVAFQNSQTR
ITSEELHYFVQNHFTSAR
MALVGLGVSHSVLK
ENMAYTVEGIR
RGNNTTSLLSQSVAK
LPNGLVIASLENYAPLSR
YAVDTVLR
EYQWIGLNDR
SWEEAESQC[CAM]R
LTWEEAR
FNVYC[CAM]FR
FWEVISDEHGIDPTGTYHGDSDLQLDR
ALTVPELTQQVFDAK
ISVYYNEATGGK
VSDTVVEPYNATLSVHQLVENTDETYC[CAM]IDNEALYDIC[CAM]FR
MAVTFIGNSTAIQELFK
TVPELTQQVFDAK
AVTEQGAELSNEER
YLAEVAC[CAM]GDDRK
QTIENSQGAYQEAFDISK
TAFDEAIAELDTLNEDSYK
SIC[CAM]TTVLELLDK
YLAEVAC[CAM]GDDR
YLIANATNPESK
KQTIENSQGAYQEAFDISK
ANWEAQQR
DVTNNVHYENYR
FEDYLNAESR
SPLAQMEEERR
VQC[CAM]C[CAM]LYFIAPSGHGLKPLDIEFMK
ILEQQNSSR
IYEFPETDDEEENKLVK
STLINSLFLTDLYSPEYPGPSHR
NLEGYVGFANLPNQVYR
ADTLTPEEC[CAM]QQFK
SPLAQMEEER
STEFNEHELK
LAPEVMEDLVK
LNLEEFQQLYVK
NKDDQITLDEFK
EFIC[CAM]ALSITSR
SDPSIVLLLQC[CAM]DIQK
VEMLEIIEAIYK
AVMEIMTK
GPGYPQAEALLAEAMLK
ALYDFEPENEGELGFK
QAVQILQQVTVR
TIEYLQPNPASR
ELGDDC[CAM]NFGPALGEVGEAMR
LLGDLGLR
DTVQC[CAM]LC[CAM]VVK
SGLLLTSILTIR
ISFTGSTATGK
AKEVGEVLC[CAM]TDPLVSK
ASGPGGLHADLLR
IYGDIIYTSAK
AAYDAFNSWK
WLPAPATFPVYDPASGAK
VGNGFEEGTTQGPLINEK
NAGQTC[CAM]VC[CAM]SNR
HQSGGNFFEPTLLSNVTR
YGIDEYLEVK
LGTVADC[CAM]GVPEAR
EVGEVLC[CAM]TDPLVSK
EFIEGVSQFSVK
DTQLQQIVDK
TIINADKDGDGR
LGASNLPAGISLPASAK
LLLSTDSAR
IGDLQAFVGR
DAGGIAGLK
YLVVLNFR
GQNEDPGSLLTQFR
NQKDEINETDLK
VAEDETEAGVK
EQGFLSFWR
KGADIMYTGTLDC[CAM]WR
DEGANAFFK
IAKDEGANAFFK
AAYFGVYDTAK
GADIMYTGTLDC[CAM]WR
IPKEQGFLSFWR
FLAGGIAAAVSK
DGLGGLPDIVR
DRVTSAVEALLSADSASR
GTGLQPGEEELPDIAPPLVTPDEPK
QAEEEKVPLPELVR
KQEVQAWDGEVR
LGHGLLSGEYSKPALESGDGEQVPEQK
IGEWELIQESGVPLKPLFGPGYTGIR
IVILPDYLEIAR
FASFPDYLVIQIK
VTSAVEALLSADSASR
ENLWLNLTDGSILC[CAM]GR
IFQNAPTDPTQDFSTQVAK
SAAESISESVPVGPK
EFDELSPSAQR
GAPEGVIDR
RIGIFGQDEDVTSK
EFTLEFSR
HTDPVPDPR
TASEMVLADDNFSTIVAAVEEGR
NMLFSGTNIAAGK
IVEFLQSFDEITAMTGDGVNDAPALK
IEVASSVK
VGEATETALTC[CAM]LVEK
IGIFGQDEDVTSK
DIVPGDIVEIAVGDKVPADIR
VDQSILTGESVSVIK
SLPSVETLGC[CAM]TSVIC[CAM]SDK
NYLEQPGKEC[CAM]VQPATK
IRDEMVATEQER
AKDIVPGDIVEIAVGDKVPADIR
DIVPGDIVEIAVGDK
TGTLTTNQMSVC[CAM]R
VIMITGDNK
ANAC[CAM]NSVIK
EAQDGLATAQLR
QAQSPGGVSSEVEVLK
AETLPEIEAQLAQR
QLSIALPQEFAALTK
SAAAGALGSPGLPLR
ESVSLAGTPSDETLATDPLGLAK
SYFMESLVDAR
EFSNLISLGTDR
LLLEHLEC[CAM]LVSR
SLVTVLGIPQKPIITGYK
VDQNDNTSLQWSNPAQQTLYFDDKK
IGPASQGLQK
TLNFNEEGDAEEAMVDNWRPAQPLK
SIVNNGHSFNVEFDDSQDNAVLK
GGPLSDSYR
QSPVDIDTATAQHDPALQPLLISYDK
VLEALHSIK
AVQQPDGLAVLGIFLK
QTTVSNSQQAYQEAFEISK
TAFDEAIAELDTLNEESYK
YLILNATQAESK
YLSEVASGENK
ADQPIEADVTVIGSGPGGYVAAIK
ADGSTQVIDTK
STDRVLGAHILGPGAGEMVNEAALALEYGASC[CAM]EDIAR
NETLGGTC[CAM]LNVGC[CAM]IPSK
VC[CAM]HAHPTLSEAFR
SEEQLKEEGIEFK
NILVATGSEVTPFPGITIDEDTIVSSTGALSLK
GIEIPEVR
EANLAAAFGKPINF
RPFTQNLGLEELGIELDPK
IPNIYAIGDVVAGPMLAHK
IDVSVEAASGGK
SVNFSLTPNEIK
NLISPDLGVVFLNVPENLKDPEPNIK
SSYYVVSGNDPAAEEPSR
DLTGQVPTPPVK
TPQASTYSYETSDR
ASLTLFC[CAM]PEEGDWK
SWDTNLIEC[CAM]NLDQELK
AIGNIELGIR
SVGNTIEPVILFQK
LEMYVLNPVK
HNLQDFINIK
GDFC[CAM]IQVGR
TFIAIKPDGVQR
SC[CAM]AHDWVYE
VMLGETNPADSKPGTIR
QNPSITWIR
NGVELTATR
IVTSEEVIIR
LTLEDSGTYEC[CAM]R
VTADVINAAEK
TLGILGLGR
VLISDSLDPC[CAM]C[CAM]R
ALVDHENVISC[CAM]PHLGASTK
AGTGVDNVDLEAATR
GQPLLVFR
ILQDGGLQVVEK
GGIVDEGALLR
KILQDGGLQVVEK
NAGTC[CAM]LSPAVIVGLLR
QADVNLVNAK
GTIQVVTQGTSLK
SIQEIQELDKDDESLRK
LTLVC[CAM]STAPGPLELDLTGDLESFKK
SIQEIQELDKDDESLR
VAVSADPNVPNVIVTR
AEEYEFLTPMEEAPK
GIVDKEEGDVLEAVLEK
SETLGSQFVLAK
IDSISSLTK
ATQSPSVSSSSSGAEPSALGGGGGSPGAC[CAM]PALGAK
SVSSSSSGAEPSALGGGGGSPGAC[CAM]PALGAK
SALDFGQSK
TSC[CAM]TTESTGLDR
TQIDHYVGIAR
NTLPVELLHESELSGSETK
GASPVPESSLTADLLSVDAFAAPSPASTASPAK
QMAFDFAR
KGDLQWNAGEK
TTAAAPPALDIFGDLFDSAPEVAAAPKP
IAAAQYSVTGSAVAR
NTLFNLSNFLDK
FIQYLASR
ATNSSWVVVFK
QAFDDAIAELDTLNEDSYK
AVTELNEPLSNEDR
YLAEVASGEK
NSVVEASEAAYK
ELETVC[CAM]NDVLALLDK
NC[CAM]NDFQYESK
SAALLLQNDHNADVQSK
SGLTSLHLAAQEDKVNVADILTK
EGHVGLVQELLGR
DSAMIDDTVVIPSHQVSALAK
LGYTPLIVAC[CAM]HYGNVK
ATFSPIVTLEPR
DVEVLEGKPIYVDC[CAM]FGNLVPLTK
RLGYISVVDTLK
EGQVDVASVLLEAGAAHSLATK
ELDFTEEQIHQIR
VALLLLEK
SGHDQVVELLLER
IENPNSLQDQSHALLK
VNVADILTK
FLGPVIVEIPHFAALR
TLEQQENFSEVAR
AGQVEVVR
ELGDDSLPSSQFLDGMNYLR
SFDDPIVQTER
SIDLPIQSSLYR
LSLTQDPVVK
NAVEEYVYDFR
DISTTLNADEAVAR
AQFEQLC[CAM]ASLLAR
EFSITDLVPYSVTLR
TSFEEGTGEC[CAM]EVFSK
QLTQDLLNSYIENEGK
SQIVTNVR
LGTVYEK
NFDEALVDYFC[CAM]DEFK
YVEHEERPK
VLATTFDPYLGGR
SGGIETIANEYSDR
FADLTDAASR
LEVERDNFAQDLGTLR
ITIPVQTFSNLQIR
LQDETNLRLEAENNLAAYR
DNFAQDLGTLR
ALAAELNQLR
KVESLEEEIQFLR
LAYINPDLALEEK
SLLSDPTYR
ALDLDSSC[CAM]K
LMDVGLIAIR
ALSAGNIDDALQC[CAM]YSEAIK
ELIEQLQNKPSDLGTK
IQFSVPAPPSQLDPR
AVQHLQTISNLSENQASEEEDELGELR
ATLSEPGEEPQHPSPP
VFLNNLC[CAM]PRPEIDNIFSEFGAK
VVLPSLAC[CAM]LR
SPVEFVEYNK
QVLLSGC[CAM]R
LNEILYPPLKQEQVQVLIEK
LRELLDVGNIGHLEQR
DYVPDTYADVIEALSNPIR
ELLDVGNIGHLEQR
WDDDSTIVTPIILR
EVIEAIAEC[CAM]AFK
LNEILYPPLK
LIETYFSKN
VC[CAM]GSNLLSIC[CAM]K
TSASIGSLC[CAM]ADAR
[truncated: 4,987 more rows]
