# Supplementary material for: Cell-specific non-canonical amino acid labelling identifies changes in the de novo proteome during memory formation
Source: eLife. 2020 Jan 6;9:e52990. doi: 10.7554/eLife.52990 (PMC6944461; doi:10.7554/eLife.52990)
Supplement: Supplementary file 2. — For each of the 1782 proteins quantified, the name, Uniprot identifier, gene name, fold change in trained compared to non-trained mice, p-value, Benjamini and Hochberg adjusted p-value, number of peptides sequences used for quantified, and the normalised protein peak area are given. Proteins contained within clusters identified by MCODE analysis are highlighted. [file elife-52990-supp2.xlsx]

## Sheet: Sheet1
Uniprot ID	Protein	Gene name	Fold Change	P Value	Anova.adj	Number of Peptides	Trained 1	Trained 2	Trained 3	Trained 4	Non-trained 1	Non-trained 2	Non-trained 3	Non-trained 4
P51863	sp|P51863|VA0D1_MOUSE	Atp6v0d1	2.03473	3.64024e-06	0.00610712	10	2.5975e+06	2.81541e+06	2.95964e+06	2.7353e+06	1.4703e+06	1.39463e+06	1.35199e+06	1.24589e+06		Signficantly Increased Synthesis	p≤0.05, FC≥1.5
Q61885	sp|Q61885|MOG_MOUSE	Mog	0.564353	6.78569e-06	0.00610712	5	1.43146e+06	1.29124e+06	1.2169e+06	1.37105e+06	2.33992e+06	2.36072e+06	2.448e+06	2.2482e+06		Signficantly Decreased Synthesis	p≤0.05, FC≤0.66
P62814	sp|P62814|VATB2_MOUSE	Atp6v1b2	1.57548	1.44998e-05	0.00869986	21	4.11277e+06	4.41408e+06	4.46076e+06	4.33003e+06	2.86391e+06	2.74776e+06	2.51682e+06	2.87367e+06
Q920I9	sp|Q920I9|WDR7_MOUSE	Wdr7	1.44555	2.50365e-05	0.0112664	17	1.49747e+06	1.55598e+06	1.68155e+06	1.50405e+06	1.12885e+06	1.06828e+06	1.07655e+06	1.03955e+06
Q9Z1G4	sp|Q9Z1G4|VPP1_MOUSE	Atp6v0a1	1.98051	5.30559e-05	0.0167331	13	2.44673e+06	2.30117e+06	2.22615e+06	2.33297e+06	1.26011e+06	1.18088e+06	978047	1.30591e+06
Q9CPZ8	sp|Q9CPZ8|COXM1_MOUSE	Cmc1	0.277184	5.57771e-05	0.0167331	1	13191.9	17275.3	12450	11984.5	58515.9	44125.7	39287.3	56784.5
Q68FD5	sp|Q68FD5|CLH1_MOUSE	Cltc	1.71578	9.5799e-05	0.024634	77	5.53518e+07	5.49756e+07	6.06628e+07	5.46402e+07	3.53765e+07	3.30233e+07	2.81785e+07	3.53537e+07
Q9JLZ3	sp|Q9JLZ3|AUHM_MOUSE	Auh	0.736267	0.000133115	0.0271853	4	640930	625931	559452	572382	825893	806810	787957	832619
Q3UHL1	sp|Q3UHL1|CAMKV_MOUSE	Camkv	1.57402	0.000156133	0.0271853	15	1.51219e+06	1.67371e+06	1.63899e+06	1.54661e+06	1.15689e+06	958641	928545	1.01496e+06
P31650	sp|P31650|S6A11_MOUSE	Slc6a11	0.501919	0.00016625	0.0271853	5	905581	951722	1.0577e+06	1.05844e+06	2.23028e+06	2.03291e+06	2.09975e+06	1.59693e+06
P15105	sp|P15105|GLNA_MOUSE	Glul	1.25272	0.00018777	0.0271853	14	4.31748e+06	4.11394e+06	3.99331e+06	4.32073e+06	3.48947e+06	3.28958e+06	3.18493e+06	3.40382e+06		Cluster name	Colour
Q8VDN2	sp|Q8VDN2|AT1A1_MOUSE	Atp1a1	1.47525	0.000203771	0.0271853	22	6.89104e+06	7.68267e+06	7.8206e+06	7.58284e+06	5.24402e+06	5.54443e+06	4.94339e+06	4.61167e+06		mRNA splicing
Q7TMB8	sp|Q7TMB8|CYFP1_MOUSE	Cyfip1	1.22924	0.00021119	0.0271853	8	845176	819505	893432	811410	681879	667910	713476	676780		RHO GTPase effectors
G5E829	sp|G5E829|AT2B1_MOUSE	Atp2b1	1.51969	0.000211441	0.0271853	15	3.17528e+06	3.30305e+06	3.72927e+06	3.14027e+06	2.08812e+06	2.4174e+06	2.19366e+06	2.07965e+06		ATP hydrolysis coupled proton transport
P43006	sp|P43006|EAA2_MOUSE	Slc1a2	2.51325	0.000241609	0.0275923	14	4.21763e+06	4.12892e+06	4.03737e+06	4.26097e+06	1.78787e+06	1.33892e+06	1.40437e+06	2.23357e+06		Vesicle-Mediated Transport
Q76MZ3	sp|Q76MZ3|2AAA_MOUSE	Ppp2r1a	1.744	0.000245265	0.0275923	22	2.71701e+06	3.24118e+06	3.51457e+06	3.33812e+06	1.92789e+06	1.59648e+06	1.89719e+06	1.91258e+06		Biogensis of Complex I
Q91VD9	sp|Q91VD9|NDUS1_MOUSE	Ndufs1	1.89354	0.000329319	0.0315283	18	3.2752e+06	2.80291e+06	2.99241e+06	2.36668e+06	1.34217e+06	1.64599e+06	1.39402e+06	1.64211e+06
P48453	sp|P48453|PP2BB_MOUSE	Ppp3cb	1.33471	0.000332531	0.0315283	6	1.15668e+06	1.08917e+06	1.22132e+06	1.12412e+06	863991	794258	859010	924568
P68404	sp|P68404|KPCB_MOUSE	Prkcb	1.53419	0.000332799	0.0315283	9	830302	968161	851216	891276	532070	570025	549497	660527
P35700	sp|P35700|PRDX1_MOUSE	Prdx1	0.772358	0.000358938	0.0323044	9	1.46656e+06	1.61484e+06	1.51505e+06	1.49799e+06	1.83781e+06	1.9341e+06	2.10676e+06	2.01697e+06
Q9R111	sp|Q9R111|GUAD_MOUSE	Gda	1.3656	0.000454564	0.0389627	11	1.23771e+06	1.29849e+06	1.36544e+06	1.31878e+06	910734	943815	901656	1.07371e+06
Q9QYS2	sp|Q9QYS2|GRM3_MOUSE	Grm3	1.85556	0.000523379	0.0421438	4	331951	246666	277129	292873	158015	178717	154476	128505
Q922E4	sp|Q922E4|PCY2_MOUSE	Pcyt2	0.541474	0.00054717	0.0421438	2	64759.2	80206.2	69804.4	76203.6	106382	141354	140495	152131
Q62419	sp|Q62419|SH3G1_MOUSE	Sh3gl1	1.49507	0.000561917	0.0421438	1	328068	340394	323468	315771	232762	218071	242188	185714
Q80VL1	sp|Q80VL1|TDRKH_MOUSE	Tdrkh	0.390023	0.00063411	0.0456559	1	100262	87406.4	80674.8	80525.7	155659	300254	224193	234803
Q9Z2Q6	sp|Q9Z2Q6|SEPT5_MOUSE	Septin5	1.31706	0.000668932	0.0463107	13	2.6397e+06	2.94506e+06	2.7742e+06	2.61121e+06	2.2147e+06	2.03149e+06	2.16993e+06	1.917e+06
P16330	sp|P16330|CN37_MOUSE	Cnp	0.723499	0.000737885	0.0491923	32	1.4682e+07	1.6481e+07	1.45029e+07	1.72775e+07	2.23415e+07	2.10275e+07	2.04224e+07	2.30649e+07
Q9D8E6	sp|Q9D8E6|RL4_MOUSE	Rpl4	1.22145	0.000822827	0.0507967	3	454248	455583	481823	481667	407020	396320	362619	368871
O88910	sp|O88910|MPP3_MOUSE	Mpp3	0.512147	0.000825222	0.0507967	2	158846	206637	139016	178910	322564	301670	402273	303136
P17710	sp|P17710|HXK1_MOUSE	Hk1	1.46814	0.000875349	0.0507967	29	5.34491e+06	4.68403e+06	5.42764e+06	4.24753e+06	3.40192e+06	3.18814e+06	3.23543e+06	3.54033e+06
P63017	sp|P63017|HSP7C_MOUSE	Hspa8	1.15868	0.000962424	0.0508267	23	9.03473e+06	9.60477e+06	9.20457e+06	9.23698e+06	8.13948e+06	8.22334e+06	7.51587e+06	8.13699e+06
Q61081	sp|Q61081|CDC37_MOUSE	Cdc37	1.38099	0.00118918	0.0541364	4	241377	240113	246323	211280	187001	169276	173118	151334
O70443	sp|O70443|GNAZ_MOUSE	Gnaz	1.34496	0.00132635	0.0648643	7	1.27383e+06	1.29754e+06	1.40805e+06	1.14839e+06	943123	1.03721e+06	891369	936717
O08599	sp|O08599|STXB1_MOUSE	Stxbp1	1.23249	0.0013555	0.0697116	38	1.88412e+07	2.17775e+07	2.14414e+07	2.1825e+07	1.66205e+07	1.75317e+07	1.67745e+07	1.70244e+07
P21619	sp|P21619|LMNB2_MOUSE	Lmnb2	0.362556	0.00152846	0.0697116	2	105362	75157	62736.7	108159	187606	307449	191251	281913
Q8R191	sp|Q8R191|SNG3_MOUSE	Syngr3	0.826694	0.00153832	0.0748371	2	391745	410837	427631	452932	512699	523311	512399	485474
P70372	sp|P70372|ELAV1_MOUSE	Elavl1	0.654989	0.00173075	0.0748371	3	107122	97370.9	118597	84324.9	160044	140539	158541	158936
Q9JHU4	sp|Q9JHU4|DYHC1_MOUSE	Dync1h1	1.2608	0.00181726	0.081129	67	1.2367e+07	1.25051e+07	1.46426e+07	1.22173e+07	1.0494e+07	1.02436e+07	1.01653e+07	1.00197e+07
Q08642	sp|Q08642|PADI2_MOUSE	Padi2	0.642216	0.00190295	0.081129	2	53057.7	53244.2	65154.9	52275.4	84013.4	99172.6	92711.3	73226.6
P08551	sp|P08551|NFL_MOUSE	Nefl	0.424032	0.00193279	0.081129	12	648133	766330	629847	833085	1.43983e+06	1.35035e+06	1.59062e+06	2.60667e+06
Q8R010	sp|Q8R010|AIMP2_MOUSE	Aimp2	2.57383	0.00195289	0.081129	1	13534	12977.1	14862	9448.38	5676.92	3714.95	3849.4	6922.43
Q9Z1B3	sp|Q9Z1B3|PLCB1_MOUSE	Plcb1	1.74305	0.00206846	0.081129	11	577503	515036	609791	597218	288554	403401	266961	377622
P31648	sp|P31648|SC6A1_MOUSE	Slc6a1	1.62727	0.00219482	0.081129	1	88258.1	117579	114796	117627	76918.5	69429.4	66351.8	56397.1
Q9R1Q8	sp|Q9R1Q8|TAGL3_MOUSE	Tagln3	1.41757	0.00220006	0.081129	3	171246	191380	208032	152242	126356	128710	127450	124010
P47911	sp|P47911|RL6_MOUSE	Rpl6	0.831022	0.00224796	0.081129	3	429794	440313	420646	461665	555856	496514	554608	503426
Q60932	sp|Q60932|VDAC1_MOUSE	Vdac1	0.681955	0.00224963	0.081129	5	301056	331272	314086	343453	487513	552384	467982	394702
P48193	sp|P48193|41_MOUSE	Epb41	0.508355	0.00225358	0.081129	1	14092.1	13681.7	15782.7	10907.7	21134.7	24271.7	27547.4	35171
Q8K2K6	sp|Q8K2K6|AGFG1_MOUSE	Agfg1	1.71683	0.00235042	0.081129	2	63312.4	62485.1	70021.3	60873.3	33647.8	40774.5	47446.1	29817.3
P04370	sp|P04370|MBP_MOUSE	Mbp	0.566619	0.00250984	0.081129	9	9.15197e+06	9.15792e+06	7.37726e+06	1.02892e+07	1.5364e+07	1.46439e+07	2.04177e+07	1.34355e+07
Q8BPN8	sp|Q8BPN8|DMXL2_MOUSE	Dmxl2	1.39579	0.00291252	0.081129	18	2.06653e+06	1.81164e+06	2.08574e+06	1.69145e+06	1.2931e+06	1.45392e+06	1.23482e+06	1.49893e+06
P51150	sp|P51150|RAB7A_MOUSE	Rab7a	0.698475	0.00295036	0.082956	7	702443	561178	598012	758985	976012	970228	900548	881489
Q61548	sp|Q61548|AP180_MOUSE	Snap91	1.36577	0.00296669	0.0868791	8	1.25821e+06	1.40102e+06	1.37602e+06	1.31419e+06	974220	1.0053e+06	836193	1.11868e+06
Q8BVE3	sp|Q8BVE3|VATH_MOUSE	Atp6v1h	1.83206	0.00302246	0.0905004	8	1.26242e+06	1.12618e+06	1.47924e+06	1.20054e+06	814840	706754	497574	782113
Q80SW1	sp|Q80SW1|SAHH2_MOUSE	Ahcyl1	0.806142	0.00305119	0.0914099	7	648323	779731	698257	687091	907840	903687	845002	828387
P16054	sp|P16054|KPCE_MOUSE	Prkce	1.3599	0.00305887	0.0914099	6	536720	526549	559308	552029	439872	431010	403139	333814
Q9DCN2	sp|Q9DCN2|NB5R3_MOUSE	Cyb5r3	0.37433	0.00305923	0.0914099	2	68986	87835.2	83736.9	99414.1	164188	294412	160199	331756
O35286	sp|O35286|DHX15_MOUSE	Dhx15	0.515648	0.00319137	0.0914099	4	149824	159396	106815	92583.7	235232	211795	261991	255927
Q91V14	sp|Q91V14|S12A5_MOUSE	Slc12a5	1.37064	0.00320937	0.0914099	14	1.81827e+06	2.0216e+06	1.99353e+06	2.08581e+06	1.51841e+06	1.65373e+06	1.25694e+06	1.37211e+06
Q5SQX6	sp|Q5SQX6|CYFP2_MOUSE	Cyfip2	1.53627	0.00321608	0.0914099	14	1.8094e+06	1.93843e+06	2.44077e+06	1.96423e+06	1.46413e+06	1.0961e+06	1.38439e+06	1.35878e+06
Q9CWZ7	sp|Q9CWZ7|SNAG_MOUSE	Napg	1.30627	0.00328892	0.0914099	9	859164	813920	863268	770075	611544	640727	719273	566507
P62761	sp|P62761|VISL1_MOUSE	Vsnl1	1.71768	0.00344885	0.0914099	7	850258	1.09029e+06	1.30962e+06	1.13194e+06	641045	659505	727125	513547
Q9Z0E0	sp|Q9Z0E0|NCDN_MOUSE	Ncdn	1.42136	0.00345077	0.0914099	17	4.31977e+06	3.90956e+06	3.72405e+06	3.99939e+06	2.86885e+06	2.7518e+06	2.36418e+06	3.30203e+06
Q9CXW3	sp|Q9CXW3|CYBP_MOUSE	Cacybp	0.594151	0.00345532	0.0914099	1	20322	28278.6	24572.4	28185.3	45619.8	40284.1	50153.1	34651.6
O54991	sp|O54991|CNTP1_MOUSE	Cntnap1	0.663872	0.00349366	0.0914099	7	298537	339789	405568	367001	453268	602395	550787	516870
P46660	sp|P46660|AINX_MOUSE	Ina	0.472744	0.00350405	0.0914099	19	2.70645e+06	2.30943e+06	2.01301e+06	2.23916e+06	4.35077e+06	3.76787e+06	4.59727e+06	7.48461e+06
P05063	sp|P05063|ALDOC_MOUSE	Aldoc	1.29244	0.00365653	0.0914099	13	2.89078e+06	3.06006e+06	2.84282e+06	2.49063e+06	2.2594e+06	2.19859e+06	1.96858e+06	2.2955e+06
Q04447	sp|Q04447|KCRB_MOUSE	Ckb	1.43843	0.00366509	0.0914099	23	1.37484e+07	1.2626e+07	1.00386e+07	1.35157e+07	8.20408e+06	8.67922e+06	8.2369e+06	9.37997e+06
P35505	sp|P35505|FAAA_MOUSE	Fah	0.55159	0.00373153	0.0914099	2	36210.9	55330.6	57561.3	50244.1	78114.7	86822.7	83475.6	110568
O89053	sp|O89053|COR1A_MOUSE	Coro1a	1.51491	0.00382469	0.0914099	11	1.21891e+06	1.0376e+06	1.22455e+06	918889	734194	695637	631553	837704
O88569	sp|O88569|ROA2_MOUSE	Hnrnpa2b1	0.616452	0.00408458	0.0929178	3	150175	163649	145422	181569	206951	236067	301720	304845
O08788	sp|O08788|DCTN1_MOUSE	Dctn1	1.31879	0.00409351	0.0929178	13	874398	808844	837740	769303	562803	630024	587082	723875
P61264	sp|P61264|STX1B_MOUSE	Stx1b	0.612101	0.00422589	0.0932883	9	642856	939115	841710	922835	1.33948e+06	1.1322e+06	1.42223e+06	1.5488e+06
Q9ERG2	sp|Q9ERG2|STRN3_MOUSE	Strn3	0.57542	0.00429562	0.0943075	2	55797.6	59839.4	59849.8	65454.3	90125.3	108944	84422.9	143931
Q80VD1	sp|Q80VD1|FA98B_MOUSE	Fam98b	1.86503	0.00433859	0.0982442	3	121862	82080.5	108632	94231.2	52689.2	65380.6	61665.3	39839
Q61699	sp|Q61699|HS105_MOUSE	Hsph1	1.17631	0.00442767	0.0982442	13	1.34747e+06	1.39159e+06	1.2685e+06	1.26532e+06	1.067e+06	1.11808e+06	1.08673e+06	1.2125e+06
Q91WQ3	sp|Q91WQ3|SYYC_MOUSE	Yars	0.587737	0.00445372	0.0989715	2	60062.4	66618.6	58444.9	49187.9	92695.8	76469.7	119264	114028
P11881	sp|P11881|ITPR1_MOUSE	Itpr1	1.42909	0.00468831	0.0989715	12	932361	766086	948541	762408	571653	515756	643964	652271
O35621	sp|O35621|PMM1_MOUSE	Pmm1	0.488504	0.00469548	0.0989715	3	478405	300218	244774	283912	588590	654519	568922	799685
P32883	sp|P32883|RASK_MOUSE	Kras	0.773972	0.0049419	0.0989715	1	140408	169700	156712	159379	203661	207525	219924	178427
O55143	sp|O55143|AT2A2_MOUSE	Atp2a2	1.30277	0.00505611	0.0989715	20	3.39612e+06	3.10217e+06	3.31135e+06	2.96611e+06	2.32718e+06	2.37722e+06	2.26757e+06	2.8636e+06
P17426	sp|P17426|AP2A1_MOUSE	Ap2a1	1.50475	0.00519537	0.0989715	21	4.16996e+06	4.84352e+06	6.21818e+06	4.8066e+06	3.57554e+06	3.56075e+06	3.10894e+06	2.97467e+06
Q9D880	sp|Q9D880|TIM50_MOUSE	Timm50	0.654697	0.00523575	0.10183	3	80115	114798	90096.7	96211.1	132441	132503	142038	174088
Q80TB8	sp|Q80TB8|VAT1L_MOUSE	Vat1l	0.48626	0.00551709	0.10183	2	96901.1	112312	95050.6	104671	160709	211162	334526	170600
O08914	sp|O08914|FAAH1_MOUSE	Faah	1.57369	0.00561086	0.105898	1	80854.1	64260.6	76777.7	60690.2	35383	51161.6	44327.6	49193.3
Q8CHT1	sp|Q8CHT1|NGEF_MOUSE	Ngef	1.59881	0.00568178	0.107071	4	417600	350896	385484	365771	240734	291169	177060	254779
P48722	sp|P48722|HS74L_MOUSE	Hspa4l	0.502604	0.00569992	0.107095	14	2.98626e+06	3.19394e+06	3.03309e+06	2.89804e+06	5.29476e+06	7.15286e+06	8.50607e+06	4.07837e+06
P63328	sp|P63328|PP2BA_MOUSE	Ppp3ca	1.35024	0.00585652	0.107095	11	2.82092e+06	2.62752e+06	2.63605e+06	2.5662e+06	1.9188e+06	1.66188e+06	2.0422e+06	2.31639e+06
P63318	sp|P63318|KPCG_MOUSE	Prkcg	1.28149	0.00595187	0.107095	13	1.53047e+06	1.30696e+06	1.42835e+06	1.51771e+06	1.1606e+06	1.05133e+06	1.03767e+06	1.26989e+06
Q9Z2W9	sp|Q9Z2W9|GRIA3_MOUSE	Gria3	2.42137	0.00604553	0.111219	1	41248.7	27832.9	30312.7	35765.2	7745.85	15914.8	18154.9	16178.8
Q9JIG8	sp|Q9JIG8|PRAF2_MOUSE	Praf2	0.677206	0.00609634	0.111219	1	87805.1	67302	76062.9	74874.2	122982	95479.5	132764	102645
Q9DBG3	sp|Q9DBG3|AP2B1_MOUSE	Ap2b1	1.66409	0.00610147	0.111219	19	3.29914e+06	4.52402e+06	5.67632e+06	4.60067e+06	3.04697e+06	2.63214e+06	2.67268e+06	2.37129e+06
Q3TXX4	sp|Q3TXX4|VGLU1_MOUSE	Slc17a7	1.60431	0.0062808	0.111219	5	505129	724481	587528	747006	463654	336989	415377	373570
Q80TJ1	sp|Q80TJ1|CAPS1_MOUSE	Cadps	1.23881	0.00637275	0.111219	18	2.0465e+06	2.36945e+06	2.32608e+06	2.41899e+06	2.02755e+06	1.84764e+06	1.81827e+06	1.7008e+06
P42669	sp|P42669|PURA_MOUSE	Pura	0.79147	0.00638884	0.111219	5	558935	575780	506902	505562	642986	680876	623964	769396
P70336	sp|P70336|ROCK2_MOUSE	Rock2	1.48192	0.00644296	0.111219	9	754601	586352	535850	522199	426718	433117	393579	352921
Q61316	sp|Q61316|HSP74_MOUSE	Hspa4	1.29306	0.00646849	0.111219	13	1.17361e+06	1.15863e+06	1.30355e+06	1.36701e+06	982085	1.09179e+06	931205	868077
Q80TL0	sp|Q80TL0|PPM1E_MOUSE	Ppm1e	1.31551	0.00648351	0.111219	2	159130	125876	136545	136197	116306	110735	102388	94324.4
Q02257	sp|Q02257|PLAK_MOUSE	Jup	0.519046	0.00648775	0.111219	7	584537	365049	333580	493021	806208	798692	1.08327e+06	693176
Q5SRX1	sp|Q5SRX1|TM1L2_MOUSE	Tom1l2	2.35311	0.00672915	0.111219	1	35490.5	26366.1	22510.9	35724.3	20757.9	12004.9	10788.5	9129.34
P08553	sp|P08553|NFM_MOUSE	Nefm	0.375809	0.00674926	0.111219	8	533781	321648	321182	418987	879127	719236	971224	1.88618e+06
P70232	sp|P70232|NCHL1_MOUSE	Chl1	1.21396	0.00675003	0.111219	1	180893	192106	189556	167474	145254	167372	142976	146135
Q8K212	sp|Q8K212|PACS1_MOUSE	Pacs1	0.743164	0.00683137	0.111219	2	167657	186046	159876	197841	240660	277812	222505	217423
Q9Z351	sp|Q9Z351|KCNQ2_MOUSE	Kcnq2	0.81121	0.00702557	0.111219	1	32640	29915.1	32672	30356.3	37158.5	34969	43498.6	39565.4
Q3TWW8	sp|Q3TWW8|SRSF6_MOUSE	Srsf6	0.43637	0.00705175	0.111219	1	24325.7	48936.2	48344	59078.1	84426.7	93694.7	117424	100947
Q9R0K7	sp|Q9R0K7|AT2B2_MOUSE	Atp2b2	1.37905	0.00726713	0.111219	17	2.84062e+06	2.60363e+06	2.86557e+06	2.48278e+06	1.98251e+06	1.85181e+06	1.67425e+06	2.36694e+06
Q99JY0	sp|Q99JY0|ECHB_MOUSE	Hadhb	0.479178	0.00730274	0.112501	4	399012	201820	225264	253902	668131	409705	618295	516170
Q91XL9	sp|Q91XL9|OSBL1_MOUSE	Osbpl1a	2.02435	0.00760241	0.112501	3	134928	139961	129683	142780	79599	51351.2	49412.2	103091
Q9D4H1	sp|Q9D4H1|EXOC2_MOUSE	Exoc2	2.69647	0.00764944	0.112501	2	127609	91413.4	98269.9	75459.7	21219.8	55121.6	28281.8	49462.1
P48036	sp|P48036|ANXA5_MOUSE	Anxa5	1.6381	0.00783076	0.112812	4	260501	245967	258948	227043	180507	179484	107310	150482
Q9DBJ1	sp|Q9DBJ1|PGAM1_MOUSE	Pgam1	1.62217	0.00796933	0.114353	10	1.18304e+06	1.88676e+06	1.34789e+06	1.76357e+06	1.09624e+06	906636	919607	838373
P17183	sp|P17183|ENOG_MOUSE	Eno2	1.70342	0.00825542	0.114353	13	1.50721e+06	1.75122e+06	1.49811e+06	2.13091e+06	1.01926e+06	1.02545e+06	1.27834e+06	749024
Q91YT0	sp|Q91YT0|NDUV1_MOUSE	Ndufv1	1.53887	0.00836703	0.116327	8	405803	537364	546555	482392	411425	275102	302327	299606
P28660	sp|P28660|NCKP1_MOUSE	Nckap1	1.6768	0.00895888	0.116327	13	818643	1.26651e+06	1.5332e+06	1.34297e+06	714106	722723	717101	729659
O35678	sp|O35678|MGLL_MOUSE	Mgll	1.48818	0.00906316	0.11973	4	264207	187235	188500	196747	131670	132013	127436	168862
Q99JY9	sp|Q99JY9|ARP3_MOUSE	Actr3	1.37788	0.00933074	0.11973	11	1.66251e+06	1.16275e+06	1.26929e+06	1.37536e+06	1.04707e+06	886219	977082	1.03263e+06
Q9CWL8	sp|Q9CWL8|CTBL1_MOUSE	Ctnnbl1	2.68896	0.00944811	0.121512	1	18561.7	11672.1	12711.7	13149.2	5428.13	9365.63	4740.94	2873.94
Q60668	sp|Q60668|HNRPD_MOUSE	Hnrnpd	0.447566	0.00953712	0.122605	1	105510	101919	109536	123582	230405	211330	167052	445987
Q91YE6	sp|Q91YE6|IPO9_MOUSE	Ipo9	3.81587	0.00964497	0.12593	1	87147	53285	76806.2	54307.9	10293.9	15093.5	12682.5	46362.6
Q811D0	sp|Q811D0|DLG1_MOUSE	Dlg1	2.01113	0.00969161	0.12656	3	246787	187288	147913	139227	107690	80375.4	61892.4	108609
Q9JM62	sp|Q9JM62|REEP6_MOUSE	Reep6	0.34698	0.00980382	0.134383	1	325098	207624	117290	174573	389149	411364	788257	755616
Q5DTY9	sp|Q5DTY9|KCD16_MOUSE	Kctd16	1.80166	0.010148	0.134824	1	122487	77625.2	109029	71252.8	45675.4	56709	63223.3	42809.5
Q9CZ13	sp|Q9CZ13|QCR1_MOUSE	Uqcrc1	1.31769	0.0101487	0.137667	15	3.41478e+06	3.0727e+06	2.91817e+06	3.29581e+06	2.58993e+06	2.05886e+06	2.2726e+06	2.76227e+06
Q9D9V3	sp|Q9D9V3|ECHD1_MOUSE	Echdc1	0.253499	0.0103653	0.138265	1	154722	196217	74503.5	39458.6	391092	364925	472445	320532
P08752	sp|P08752|GNAI2_MOUSE	Gnai2	0.81516	0.0108591	0.138442	4	391907	364497	400316	327242	435585	447285	435081	499977
P28652	sp|P28652|KCC2B_MOUSE	Camk2b	0.810699	0.0109838	0.138452	8	1.03933e+06	886063	1.05494e+06	918173	1.2932e+06	1.25411e+06	1.09303e+06	1.16493e+06
Q8VDQ8	sp|Q8VDQ8|SIR2_MOUSE	Sirt2	0.717285	0.0111029	0.138452	7	1.28003e+06	1.05903e+06	962201	1.17661e+06	1.38768e+06	1.70836e+06	1.37542e+06	1.77809e+06
P70168	sp|P70168|IMB1_MOUSE	Kpnb1	1.3674	0.0112281	0.138952	9	868123	806739	910353	769721	521001	556772	659424	733818
Q8CGF6	sp|Q8CGF6|WDR47_MOUSE	Wdr47	1.4287	0.0113568	0.14161	2	91267.2	91867.9	88955.4	97155.5	72873.7	58315.5	51838.6	78948.9
P84099	sp|P84099|RL19_MOUSE	Rpl19	0.695051	0.0118336	0.14161	1	42555.8	43905.8	43663.1	39382.5	71617.7	51475.7	72949.3	51190.4
Q148V7	sp|Q148V7|RELCH_MOUSE	Relch	2.86385	0.0119333	0.143519	3	209618	114682	76317.4	94198.4	22143.3	47093.6	46144.6	53390.4
P02088	sp|P02088|HBB1_MOUSE	Hbb-b1	1.34219	0.0119556	0.14921	3	1.08598e+06	1.17819e+06	881117	1.24492e+06	768653	763638	866683	850110
P84309	sp|P84309|ADCY5_MOUSE	Adcy5	4.92072	0.0120898	0.149779	1	29571.3	43709.3	48108.7	65566.4	2781.06	9777.07	13654.9	18729.5
P29387	sp|P29387|GBB4_MOUSE	Gnb4	1.28873	0.0121074	0.150264	1	16149.1	17530.8	21519.3	19511.4	15678.9	14346.2	14472	13238.5
E9PVA8	sp|E9PVA8|GCN1_MOUSE	Gcn1	7.02877	0.0124436	0.150826	1	6719.3	9470.96	21450.9	18523.5	1057.2	826.21	1678.86	7064.93
Q62425	sp|Q62425|NDUA4_MOUSE	Ndufa4	0.732542	0.0125188	0.151425	4	597025	695938	585062	793506	960826	1.01387e+06	845764	813033
Q9Z1G3	sp|Q9Z1G3|VATC1_MOUSE	Atp6v1c1	1.59204	0.0125283	0.155667	11	1.27802e+06	1.0052e+06	1.6204e+06	1.39553e+06	708398	838418	1.03752e+06	733836
P50518	sp|P50518|VATE1_MOUSE	Atp6v1e1	2.14524	0.0126043	0.155667	3	223634	181874	218063	181864	106577	115931	123035	50100.8
P80313	sp|P80313|TCPH_MOUSE	Cct7	1.30457	0.012695	0.155667	8	419620	528288	578731	505813	425242	374824	387226	362991
Q8K183	sp|Q8K183|PDXK_MOUSE	Pdxk	1.90112	0.0127491	0.155667	6	337204	365061	269199	352640	202078	143598	120183	256515
Q8CGY8	sp|Q8CGY8|OGT1_MOUSE	Ogt	1.20487	0.0127894	0.155667	5	436841	355275	399595	363632	338857	329560	315968	303261
Q9DB05	sp|Q9DB05|SNAA_MOUSE	Napa	1.22483	0.0131548	0.156605	6	342364	338269	415212	393533	318582	279228	306356	308525
Q6ZQ38	sp|Q6ZQ38|CAND1_MOUSE	Cand1	1.33736	0.0132082	0.156605	16	2.74595e+06	3.30574e+06	3.69532e+06	3.14635e+06	2.65566e+06	2.18129e+06	2.63114e+06	2.16469e+06
Q6ZPE2	sp|Q6ZPE2|MTMR5_MOUSE	Sbf1	2.04577	0.0133326	0.156605	9	751993	583947	616271	617157	410489	243739	204711	465544
P61750	sp|P61750|ARF4_MOUSE	Arf4	0.660919	0.0133473	0.156605	1	35504	28773.4	27248.8	31646.8	54961.3	40020.7	55947.8	37517
Q8BHZ0	sp|Q8BHZ0|FA49A_MOUSE	Fam49a	1.84427	0.0134237	0.156605	2	63765.7	72782.3	97004.3	79086.5	26820.8	44753.3	53753.3	47698.4
P47857	sp|P47857|PFKAM_MOUSE	Pfkm	1.20878	0.0135065	0.156605	18	3.88567e+06	4.04738e+06	3.57014e+06	4.17159e+06	3.49838e+06	3.37441e+06	2.86817e+06	3.24021e+06
O08529	sp|O08529|CAN2_MOUSE	Capn2	0.716791	0.0136823	0.156605	5	216348	259202	248442	262185	347535	296459	308920	434757
Q60598	sp|Q60598|SRC8_MOUSE	Cttn	0.571062	0.0141652	0.1589	1	41089.4	38812.7	22259.1	39771.7	53370.2	53753.3	63751.1	72587.3
E9Q3L2	sp|E9Q3L2|PI4KA_MOUSE	Pi4ka	1.2645	0.0143473	0.1589	8	350997	369232	463249	361198	297135	303121	326426	288494
P62137	sp|P62137|PP1A_MOUSE	Ppp1ca	1.18335	0.0143714	0.1589	3	306460	308641	278306	311696	224629	267106	267491	260717
P47754	sp|P47754|CAZA2_MOUSE	Capza2	2.24608	0.0143754	0.1589	3	433255	537136	462418	570494	251861	387655	131650	187666
P29758	sp|P29758|OAT_MOUSE	Oat	1.54782	0.0145965	0.1589	3	123877	90185.4	131767	87215.3	58691	64585.2	71709.3	82292.9
Q9QZ06	sp|Q9QZ06|TOLIP_MOUSE	Tollip	1.52395	0.0151076	0.1589	2	225328	199847	180312	165385	123434	106559	111206	170215
P35282	sp|P35282|RAB21_MOUSE	Rab21	0.691307	0.0153574	0.159923	3	249023	180427	174036	160345	276123	234009	284907	298204
O35855	sp|O35855|BCAT2_MOUSE	Bcat2	0.384286	0.0157823	0.163771	1	186581	386267	391373	392171	848123	1.10712e+06	1.19315e+06	452744
Q99LC3	sp|Q99LC3|NDUAA_MOUSE	Ndufa10	1.4863	0.016086	0.163771	6	543904	433769	503593	502529	298149	307905	288965	461215
Q61820	sp|Q61820|RANT_MOUSE	Rasl2-9	0.795927	0.0162381	0.163771	1	119308	129434	141854	158616	170087	187284	160866	168957
P80317	sp|P80317|TCPZ_MOUSE	Cct6a	1.22735	0.0165004	0.163771	9	615944	700347	767088	665947	539317	624817	513235	561501
Q9WVK8	sp|Q9WVK8|CP46A_MOUSE	Cyp46a1	1.51241	0.0168353	0.165244	5	286477	329091	334266	340076	290180	187710	224645	167398
P19246	sp|P19246|NFH_MOUSE	Nefh	0.467232	0.016897	0.169961	5	273419	270028	250285	202395	545090	306493	518270	906348
Q6PH08	sp|Q6PH08|ERC2_MOUSE	Erc2	0.069998	0.0169132	0.171698	1	10444.3	74751.8	2279.46	2646.94	112298	117264	141604	105227
Q9Z2C4	sp|Q9Z2C4|MTMR1_MOUSE	Mtmr1	1.32557	0.0170677	0.175359	1	84983.3	99725.1	109003	80654.6	76889.5	61651.8	75037.5	67841.7
Q6PIE5	sp|Q6PIE5|AT1A2_MOUSE	Atp1a2	0.877454	0.017195	0.177637	23	5.9532e+06	6.36234e+06	6.24019e+06	5.83028e+06	7.49076e+06	7.21526e+06	6.67285e+06	6.44565e+06
Q9D394	sp|Q9D394|RUFY3_MOUSE	Rufy3	0.814244	0.0173355	0.178223	9	695863	713543	775163	657604	940186	967655	807668	783640
P62874	sp|P62874|GBB1_MOUSE	Gnb1	1.20795	0.0174297	0.180005	8	2.04314e+06	2.19056e+06	1.90355e+06	1.89494e+06	1.65151e+06	1.65956e+06	1.48278e+06	1.86582e+06
Q8CAA7	sp|Q8CAA7|PGM2L_MOUSE	Pgm2l1	1.29767	0.0175294	0.181213	12	1.22233e+06	1.09488e+06	1.528e+06	1.222e+06	1.0722e+06	901651	990081	920670
Q8BGX2	sp|Q8BGX2|TIM29_MOUSE	Timm29	0.701227	0.0177501	0.181213	1	80668.8	63688.2	59742	54080.5	98415.7	73969.2	96597.5	97626.7
Q9D0K2	sp|Q9D0K2|SCOT1_MOUSE	Oxct1	1.28454	0.0180283	0.181213	7	429308	461052	461811	486888	423305	368532	353137	296720
Q9JKV2	sp|Q9JKV2|ICK_MOUSE	Ick	0.880458	0.0181113	0.181787	1	181721	157899	180225	160627	187693	198775	195755	189259
Q3TLI0	sp|Q3TLI0|TPC10_MOUSE	Trappc10	5.73113	0.0182078	0.182065	1	26902	28643.3	35216.7	23876.4	1102.91	5735.93	6784.35	13993.1
O54774	sp|O54774|AP3D1_MOUSE	Ap3d1	1.53895	0.0184572	0.182386	4	208133	201138	290470	178197	147766	173961	120876	124329
Q9QZX7	sp|Q9QZX7|SRR_MOUSE	Srr	1.75138	0.0185247	0.182386	6	401440	354963	399484	363065	192810	244124	144162	323727
P46097	sp|P46097|SYT2_MOUSE	Syt2	0.200034	0.0186161	0.182386	1	10706.3	10071.1	3162.04	33830.1	65879.5	60275.1	51227.5	35414.5
O08553	sp|O08553|DPYL2_MOUSE	Dpysl2	1.23269	0.0186419	0.183622	29	1.52823e+07	1.63199e+07	1.37231e+07	1.59751e+07	1.39665e+07	1.14255e+07	1.12737e+07	1.31629e+07
Q9WTQ5	sp|Q9WTQ5|AKA12_MOUSE	Akap12	0.283049	0.0189047	0.185164	1	7540.19	9301.43	10565.9	6142.45	22608.6	12854.4	78112.2	31238.5
P49442	sp|P49442|INPP_MOUSE	Inpp1	2.11972	0.0191094	0.185164	1	125569	111260	133948	102623	66775.6	78703.8	63860.3	28342.9
Q8BTG3	sp|Q8BTG3|T11L1_MOUSE	Tcp11l1	2.13431	0.0195442	0.185164	1	43025.4	32978.5	34418.8	36771	21420.9	24170.1	19320	8651.78
Q99KJ8	sp|Q99KJ8|DCTN2_MOUSE	Dctn2	0.335978	0.0198879	0.185389	1	13074.1	20735.9	30536.7	65718.3	72435.9	92815.7	84874	74825
Q62048	sp|Q62048|PEA15_MOUSE	Pea15	1.84957	0.0199229	0.185389	2	67812.2	108783	66914.5	115416	68121.7	38422.2	45259.7	41095.7
Q7TPR4	sp|Q7TPR4|ACTN1_MOUSE	Actn1	1.4085	0.0199431	0.185389	13	890582	815356	724938	903920	664744	522110	481837	722942
P14231	sp|P14231|AT1B2_MOUSE	Atp1b2	0.653161	0.0200334	0.185389	6	293091	408500	342815	453325	574822	655584	631157	429817
Q9Z2H2	sp|Q9Z2H2|RGS6_MOUSE	Rgs6	1.27665	0.0201642	0.18697	3	278159	220753	237489	229199	192923	170506	220368	173579
Q9DBC7	sp|Q9DBC7|KAP0_MOUSE	Prkar1a	1.3076	0.0209212	0.187961	3	107123	122214	139038	148924	90682	97890.5	111850	93392.9
P17427	sp|P17427|AP2A2_MOUSE	Ap2a2	1.37309	0.0209617	0.191193	18	2.69648e+06	3.45826e+06	4.24653e+06	3.72487e+06	2.74527e+06	2.6239e+06	2.48114e+06	2.3218e+06
Q06138	sp|Q06138|CAB39_MOUSE	Cab39	1.41947	0.0211586	0.191809	2	132798	126796	141369	131185	93367.1	121638	95676.6	70787.7
Q9D8W5	sp|Q9D8W5|PSD12_MOUSE	Psmd12	1.85468	0.0213773	0.191809	3	219949	159953	225281	216603	100130	130727	68931.7	160795
Q60780	sp|Q60780|GAS7_MOUSE	Gas7	0.494305	0.0214961	0.191809	1	60670.3	108466	56860	59667.8	162411	107642	208453	102620
Q3TDK6	sp|Q3TDK6|ROGDI_MOUSE	Rogdi	1.26518	0.0215042	0.191809	3	335659	258043	278690	240920	220212	226979	202142	224644
Q5DTL9	sp|Q5DTL9|S4A10_MOUSE	Slc4a10	3.9103	0.0216712	0.19204	2	29678.8	83028.4	81127	77859	31964.1	8697.42	8393.7	28529.9
Q9D2G2	sp|Q9D2G2|ODO2_MOUSE	Dlst	0.615816	0.0218258	0.197545	8	1.01694e+06	1.54665e+06	1.04253e+06	1.13153e+06	1.53035e+06	1.74571e+06	2.71752e+06	1.77705e+06
P52196	sp|P52196|THTR_MOUSE	Tst	0.765824	0.0231755	0.197545	2	163526	132453	114595	151452	162481	188658	181671	196249
Q8CC35	sp|Q8CC35|SYNPO_MOUSE	Synpo	2.13835	0.0233325	0.198362	5	611761	421790	445414	403605	166683	153404	203209	426984
Q6NXK7	sp|Q6NXK7|DPP10_MOUSE	Dpp10	1.94192	0.0233969	0.1985	2	138054	107256	92952	119968	61776.7	52518.3	36663	97611.5
P34152	sp|P34152|FAK1_MOUSE	Ptk2	1.6703	0.0234203	0.1985	1	79062.2	51413.4	57991.7	59875.5	26561.2	41982.2	32007	50806.8
P99028	sp|P99028|QCR6_MOUSE	Uqcrh	1.58895	0.0235749	0.1985	2	188951	156337	176900	157456	143877	71627.2	106514	117592
P28740	sp|P28740|KIF2A_MOUSE	Kif2a	0.60861	0.0241723	0.199021	4	212468	127169	120746	130467	183545	300587	241633	232716
Q60875	sp|Q60875|ARHG2_MOUSE	Arhgef2	1.4609	0.0243004	0.199423	6	386130	333332	368527	307428	300629	206972	278001	185078
P34884	sp|P34884|MIF_MOUSE	Mif	0.830993	0.0245099	0.204642	2	445803	476277	449650	559081	592574	625412	563375	536111
Q6NS52	sp|Q6NS52|DGKB_MOUSE	Dgkb	1.43332	0.0251153	0.208696	2	201755	198252	148640	206317	124020	117490	115741	172330
Q9QVP9	sp|Q9QVP9|FAK2_MOUSE	Ptk2b	1.31368	0.0252479	0.208696	7	460430	566052	602208	553515	452068	369927	361735	482200
Q6P5F9	sp|Q6P5F9|XPO1_MOUSE	Xpo1	1.64939	0.0256974	0.208696	2	111653	62385	86484.6	82418.3	40680	65861	42205.2	59325.8
Q9D6R2	sp|Q9D6R2|IDH3A_MOUSE	Idh3a	1.30281	0.0259198	0.208696	13	1.93124e+06	2.58541e+06	2.62855e+06	2.48548e+06	1.97578e+06	1.8645e+06	1.96071e+06	1.56767e+06
Q9D7X3	sp|Q9D7X3|DUS3_MOUSE	Dusp3	1.38042	0.0264546	0.209039	3	258867	191345	161837	195094	137593	165991	144474	130526
Q8VD37	sp|Q8VD37|SGIP1_MOUSE	Sgip1	1.32236	0.0264556	0.213129	6	385950	290830	312860	291570	200166	271791	235274	261616
P35802	sp|P35802|GPM6A_MOUSE	Gpm6a	1.34891	0.0267029	0.213129	5	962103	1.25134e+06	1.43954e+06	1.01619e+06	884418	936328	837286	767184
Q9ESN9	sp|Q9ESN9|JIP3_MOUSE	Mapk8ip3	1.61097	0.0267044	0.213129	1	65147.6	47127	49713.2	42652.5	27756.8	25019.9	29972.4	46436.4
P39053	sp|P39053|DYN1_MOUSE	Dnm1	1.21486	0.0268157	0.213129	32	1.45795e+07	1.71115e+07	1.96627e+07	1.65361e+07	1.47776e+07	1.39291e+07	1.39076e+07	1.30082e+07
P47757	sp|P47757|CAPZB_MOUSE	Capzb	1.1757	0.0270394	0.217344	5	470324	542977	510966	558443	477862	469765	407385	417043
Q7TQF7	sp|Q7TQF7|AMPH_MOUSE	Amph	1.38389	0.0270399	0.217446	1	93196	76865.3	96412.1	71700	66918	46971.5	65768.9	65309.3
Q01853	sp|Q01853|TERA_MOUSE	Vcp	1.22573	0.0270925	0.219734	20	2.49149e+06	1.81545e+06	2.21958e+06	2.05303e+06	1.64425e+06	1.72349e+06	1.76855e+06	1.82197e+06
Q91ZX7	sp|Q91ZX7|LRP1_MOUSE	Lrp1	1.55333	0.0272447	0.219734	9	611549	483863	463215	453867	341118	324213	224189	430980
Q63932	sp|Q63932|MP2K2_MOUSE	Map2k2	1.77761	0.0272515	0.219734	2	43522.5	90807.9	82300.5	98172.4	51588.8	37709.1	39483.1	41635.9
Q6P069	sp|Q6P069|SORCN_MOUSE	Sri	2.29025	0.0275028	0.219734	1	35329.2	26648.6	27987.3	21837.7	6013.65	22141.5	11697.8	13427.5
Q80UG2	sp|Q80UG2|PLXA4_MOUSE	Plxna4	1.39457	0.0275451	0.219734	10	587912	442153	492639	481355	377572	303938	308301	460641
Q8BGZ1	sp|Q8BGZ1|HPCL4_MOUSE	Hpcal4	5.54599	0.0275994	0.219734	2	117093	103878	168020	127396	21850.3	5856.22	21197.1	101462
Q9DBF1	sp|Q9DBF1|AL7A1_MOUSE	Aldh7a1	0.699167	0.0276846	0.219734	4	124668	205145	150124	194923	236663	265732	228158	218273
Q8BWF0	sp|Q8BWF0|SSDH_MOUSE	Aldh5a1	0.793375	0.0278084	0.219734	12	837770	1.09437e+06	899600	1.05895e+06	1.25786e+06	1.18831e+06	1.36144e+06	1.08327e+06
P18872	sp|P18872|GNAO_MOUSE	Gnao1	1.08309	0.0279797	0.219734	14	6.00148e+06	6.46558e+06	6.6199e+06	6.16284e+06	6.08281e+06	5.61606e+06	5.81172e+06	5.79421e+06
Q9DCT2	sp|Q9DCT2|NDUS3_MOUSE	Ndufs3	1.22999	0.0280194	0.219734	3	264236	202538	208389	235850	198737	189341	183770	166190
Q4KMM3	sp|Q4KMM3|OXR1_MOUSE	Oxr1	1.33807	0.0280504	0.219734	8	428295	322795	389558	345258	330771	231501	296941	255106
P12382	sp|P12382|PFKAL_MOUSE	Pfkl	1.25115	0.0281552	0.219734	13	1.46218e+06	1.62692e+06	1.34893e+06	1.64352e+06	1.41026e+06	1.06122e+06	1.13797e+06	1.26374e+06
Q8K4Z3	sp|Q8K4Z3|NNRE_MOUSE	Naxe	1.64655	0.0282955	0.219734	3	223814	161427	223169	172449	133499	118708	155245	76893.3
P07356	sp|P07356|ANXA2_MOUSE	Anxa2	0.602659	0.0283213	0.219734	3	121768	72197.2	87625.1	79467.9	189077	171626	139021	102869
Q9Z0Y1	sp|Q9Z0Y1|DCTN3_MOUSE	Dctn3	0.175057	0.0287003	0.219734	1	23076.5	22257.3	5857.3	5512.8	54100	105120	19438.1	159754
Q9CQI6	sp|Q9CQI6|COTL1_MOUSE	Cotl1	0.820123	0.0287983	0.219734	3	174712	201398	218273	213879	259396	216070	268164	241585
P23818	sp|P23818|GRIA1_MOUSE	Gria1	1.39806	0.0288414	0.219734	5	303468	309432	301921	230002	222278	202424	156950	241704
Q9JLJ2	sp|Q9JLJ2|AL9A1_MOUSE	Aldh9a1	0.61037	0.029225	0.219734	3	86519.1	130938	102523	99395.3	195595	180157	215296	109635
Q99M71	sp|Q99M71|EPDR1_MOUSE	Epdr1	0.490412	0.0294292	0.219734	1	54027.9	46097.1	44508.2	42758.8	71107.3	89687.1	193532	66392.1
Q3UGR5	sp|Q3UGR5|HDHD2_MOUSE	Hdhd2	0.767747	0.0296566	0.219734	2	198032	201925	146604	194726	234699	279718	229759	217830
Q91VR2	sp|Q91VR2|ATPG_MOUSE	Atp5f1c	0.7756	0.0298656	0.219734	8	1.54585e+06	1.70087e+06	1.60714e+06	1.88643e+06	2.42857e+06	2.24735e+06	2.34695e+06	1.71971e+06
Q9QYF9	sp|Q9QYF9|NDRG3_MOUSE	Ndrg3	1.33667	0.0301358	0.219734	2	388168	389912	483548	370113	318435	334134	336699	236856
Q9EP69	sp|Q9EP69|SAC1_MOUSE	Sacm1l	0.612857	0.0302075	0.219734	3	202546	138153	91010.7	151127	214626	237254	205974	260121
P51881	sp|P51881|ADT2_MOUSE	Slc25a5	0.805758	0.0306248	0.220913	9	9.985e+06	1.21841e+07	1.20686e+07	1.2655e+07	1.48866e+07	1.5473e+07	1.55553e+07	1.23025e+07
A2AGT5	sp|A2AGT5|CKAP5_MOUSE	Ckap5	1.39894	0.0307116	0.220913	2	117052	94600.6	115437	101059	56072.4	88030.9	76809.1	88961.1
O54829	sp|O54829|RGS7_MOUSE	Rgs7	1.54342	0.030809	0.220913	2	151438	160700	174670	160439	98313.4	76235.4	101346	158222
Q9JIF7	sp|Q9JIF7|COPB_MOUSE	Copb1	1.39856	0.0308811	0.222903	3	185790	218579	176118	183298	153586	168446	129511	102270
Q8CE96	sp|Q8CE96|TRM6_MOUSE	Trmt6	0.523232	0.0309192	0.223513	1	23315.5	25547.5	33255.9	12513.5	41586.1	56416.5	40826.4	34527.8
P28271	sp|P28271|ACOC_MOUSE	Aco1	0.865917	0.0317794	0.224294	1	317996	327341	302678	275003	354473	362660	319353	375390
P28661	sp|P28661|SEPT4_MOUSE	Septin4	1.32996	0.0322349	0.224929	3	873900	928899	1.28351e+06	975804	828451	828784	725745	652139
Q8CA95	sp|Q8CA95|PDE10_MOUSE	Pde10a	1.53753	0.0326942	0.225616	2	136676	90894.9	96080.9	118237	88014.1	79393	72486.6	49857.9
P52503	sp|P52503|NDUS6_MOUSE	Ndufs6	1.89412	0.0330914	0.225616	1	24652.9	24801.4	33969.6	19804.4	11162.7	8480.06	21701.6	15556.4
P62806	sp|P62806|H4_MOUSE	Hist1h4a	0.647925	0.033396	0.226238	1	99286.2	100454	79491.5	108297	99736.5	160100	154772	197134
P58281	sp|P58281|OPA1_MOUSE	Opa1	1.2146	0.033578	0.226238	18	1.52608e+06	1.61851e+06	1.69389e+06	1.65755e+06	1.38623e+06	1.24949e+06	1.16191e+06	1.58334e+06
P19253	sp|P19253|RL13A_MOUSE	Rpl13a	0.675052	0.0336465	0.226238	1	52846	62712.6	53360.3	57285.5	95032.3	94265.6	98408.1	55338.3
P49025	sp|P49025|CTRO_MOUSE	Cit	0.240191	0.0336868	0.226238	3	26227.5	134872	11869.2	32753.8	138282	102832	176821	164326
P17809	sp|P17809|GTR1_MOUSE	Slc2a1	0.798344	0.0337155	0.226238	2	256221	204355	200971	222684	246510	263210	271839	327049
Q61598	sp|Q61598|GDIB_MOUSE	Gdi2	1.17454	0.0337686	0.231591	9	1.24245e+06	1.35709e+06	1.38252e+06	1.49754e+06	1.21308e+06	1.29005e+06	1.10697e+06	1.05885e+06
P56399	sp|P56399|UBP5_MOUSE	Usp5	1.2689	0.0338846	0.233963	13	1.83259e+06	1.47938e+06	1.57094e+06	1.43575e+06	1.02975e+06	1.29748e+06	1.241e+06	1.42256e+06
Q9EQ20	sp|Q9EQ20|MMSA_MOUSE	Aldh6a1	0.750894	0.0339079	0.236125	6	386173	382549	294388	405132	496245	452832	592831	416013
P26443	sp|P26443|DHE3_MOUSE	Glud1	0.772686	0.0339758	0.236125	19	3.04467e+06	4.5811e+06	3.9525e+06	4.30235e+06	5.20987e+06	5.38184e+06	5.04172e+06	4.70695e+06
Q68FF6	sp|Q68FF6|GIT1_MOUSE	Git1	1.29444	0.0344628	0.236125	3	352189	229824	293150	259808	231502	205214	219720	210359
Q99MK8	sp|Q99MK8|ARBK1_MOUSE	Grk2	1.40072	0.0345004	0.236125	4	400245	278908	326331	304991	279770	262649	182901	214749
O88384	sp|O88384|VTI1B_MOUSE	Vti1b	0.430329	0.034677	0.236125	1	9605.49	25104.1	14696.1	19355.8	21297	60823.3	48540.2	31811.7
Q99KB8	sp|Q99KB8|GLO2_MOUSE	Hagh	0.733088	0.034797	0.236125	2	19082.6	12754.4	18635.2	18092.1	20847.9	21621.3	22726.3	27734.8
Q922B1	sp|Q922B1|MACD1_MOUSE	Macrod1	0.441073	0.0354585	0.236125	1	7184.04	13586.2	21120.1	14773.1	26236.9	51652.8	19557.4	30358
A2AAE1	sp|A2AAE1|K1109_MOUSE	Kiaa1109	0.161215	0.0356844	0.236125	1	679.388	4995.24	1685.1	10428.8	20937.6	9105.06	37568.3	12327.6
Q8BH59	sp|Q8BH59|CMC1_MOUSE	Slc25a12	1.13397	0.035943	0.236125	22	5.50099e+06	5.40562e+06	5.48188e+06	5.50753e+06	5.21927e+06	4.94745e+06	4.21786e+06	4.98513e+06
O08917	sp|O08917|FLOT1_MOUSE	Flot1	1.47652	0.0362502	0.236125	4	184412	138881	143437	114337	88632.5	104242	76276.7	125398
Q9QXB9	sp|Q9QXB9|DRG2_MOUSE	Drg2	0.730547	0.036508	0.236125	1	49702	66657.7	77494.6	75840.2	77008.2	99619.4	93047.1	95767.4
P53994	sp|P53994|RAB2A_MOUSE	Rab2a	0.333812	0.0368047	0.237934	4	377224	275475	283380	495453	1.3345e+06	1.2061e+06	346417	2.10738e+06
Q9D2M8	sp|Q9D2M8|UB2V2_MOUSE	Ube2v2	0.859357	0.0368073	0.237934	2	302123	344933	370710	323273	392946	427966	376115	362045
O55091	sp|O55091|IMPCT_MOUSE	Impact	0.77813	0.0370141	0.238154	3	61492.1	57975.5	75276.8	73197.9	100929	72769.7	82233.8	88715.5
O35643	sp|O35643|AP1B1_MOUSE	Ap1b1	1.34112	0.0376184	0.238154	5	896670	1.21573e+06	1.39402e+06	1.15106e+06	985944	880090	848468	734441
Q9CWE0	sp|Q9CWE0|MFR1L_MOUSE	Mtfr1l	2.47796	0.037888	0.241762	2	120489	79255.6	51878.4	56413	27366.6	13513.5	45220.3	44324.8
Q9CQ92	sp|Q9CQ92|FIS1_MOUSE	Fis1	1.50185	0.0380563	0.242384	2	60387	47129.1	48942.5	52324.7	35817.3	28624.9	27290.6	51199.4
Q8CI94	sp|Q8CI94|PYGB_MOUSE	Pygb	1.17589	0.0384659	0.243223	24	6.07419e+06	6.64794e+06	6.92024e+06	6.45882e+06	6.35776e+06	5.66685e+06	4.89097e+06	5.35727e+06
O08848	sp|O08848|RO60_MOUSE	RO60	1.73794	0.0385564	0.244383	2	88392.8	81281.2	93572.6	74252.9	45794.4	70261.1	27955.2	60833.6
Q9EQF6	sp|Q9EQF6|DPYL5_MOUSE	Dpysl5	0.79512	0.0385714	0.245203	5	380423	361663	365485	429630	545353	393053	465332	541889
E9Q557	sp|E9Q557|DESP_MOUSE	Dsp	0.555253	0.0387108	0.245382	2	566496	235262	256576	263449	450813	515175	678958	601040
Q91W89	sp|Q91W89|MA2C1_MOUSE	Man2c1	1.64937	0.0387963	0.245382	1	56743.2	32340.5	38149.3	36132.4	31451	16115.5	27751.4	24300.1
Q8R071	sp|Q8R071|IP3KA_MOUSE	Itpka	1.55506	0.0388124	0.24585	7	758872	449045	493034	432891	253968	313744	387536	402777
Q6PER3	sp|Q6PER3|MARE3_MOUSE	Mapre3	0.713841	0.0390034	0.248945	1	284409	174870	163360	181970	275702	261520	269992	292485
Q8VIJ6	sp|Q8VIJ6|SFPQ_MOUSE	Sfpq	0.736157	0.039682	0.249509	2	94720.8	106051	89344.8	103171	137157	104062	125017	176696
Q9D0M1	sp|Q9D0M1|KPRA_MOUSE	Prpsap1	5.46276	0.0399179	0.249509	1	46113	23360.2	108739	33029.1	20055.8	22694.2	3405.33	2802.99
Q8BZ98	sp|Q8BZ98|DYN3_MOUSE	Dnm3	0.90306	0.0402044	0.249509	12	1.14247e+06	1.11363e+06	991031	1.08851e+06	1.20768e+06	1.19294e+06	1.12944e+06	1.26824e+06
Q8C1B1	sp|Q8C1B1|CAMP2_MOUSE	Camsap2	0.522501	0.0413522	0.249509	1	10165.7	14039.9	11391.5	19382.3	24169.2	15421.7	42291.9	26821.7
Q9ES97	sp|Q9ES97|RTN3_MOUSE	Rtn3	1.38945	0.0413852	0.249509	9	588788	655729	612361	542701	407484	360620	381445	614168
P22723	sp|P22723|GBRG2_MOUSE	Gabrg2	3.49247	0.0417946	0.249509	1	19439.7	10780.9	27406.8	22379.8	10802.8	1670.47	4533.38	10561.6
Q3UVL4	sp|Q3UVL4|VPS51_MOUSE	Vps51	1.44029	0.0426084	0.249509	5	331582	212452	288625	241753	214977	184866	209668	137080
Q9ERR1	sp|Q9ERR1|NDEL1_MOUSE	Ndel1	0.657161	0.0427694	0.249509	2	37903.8	59708.6	31246.3	39506.3	73097.6	57659.9	49844.1	71302.6
Q8VEJ9	sp|Q8VEJ9|VPS4A_MOUSE	Vps4a	0.462096	0.0429614	0.249844	2	29112.5	96544.3	101917	50758.6	125258	126936	126974	157953
P23819	sp|P23819|GRIA2_MOUSE	Gria2	1.39742	0.0430319	0.253289	7	253437	361692	386244	334528	207247	246736	300912	201852
Q60759	sp|Q60759|GCDH_MOUSE	Gcdh	0.509006	0.0431959	0.253895	2	133754	58950.7	53266.4	118440	156944	164783	226009	126786
P05201	sp|P05201|AATC_MOUSE	Got1	0.875998	0.043395	0.254817	21	4.80533e+06	4.78987e+06	4.00551e+06	4.56836e+06	5.50863e+06	5.2592e+06	5.16585e+06	4.77911e+06
Q9CR86	sp|Q9CR86|CHSP1_MOUSE	Carhsp1	0.23821	0.0435839	0.260466	1	7432.04	16188.7	17105.5	25728	52705.8	17887.8	90619.4	192480
P59999	sp|P59999|ARPC4_MOUSE	Arpc4	1.14961	0.0439174	0.260466	4	1.21148e+06	1.06074e+06	1.17218e+06	1.20221e+06	997368	1.11918e+06	1.03336e+06	898861
Q9WUA3	sp|Q9WUA3|PFKAP_MOUSE	Pfkp	1.56777	0.0439592	0.262126	13	1.59667e+06	2.18827e+06	3.35973e+06	2.12956e+06	1.60476e+06	1.69877e+06	1.16594e+06	1.30185e+06
Q99LP6	sp|Q99LP6|GRPE1_MOUSE	Grpel1	1.77605	0.0443289	0.266177	1	40589.5	30490.2	43660.6	31481.1	15062.2	29301.7	13423.8	28856.1
P14869	sp|P14869|RLA0_MOUSE	Rplp0	1.35569	0.0444689	0.266177	2	185089	218133	214680	216793	136794	202588	166322	120688
Q6P9K8	sp|Q6P9K8|CSKI1_MOUSE	Caskin1	0.872816	0.0448013	0.266177	5	195216	154269	173679	173823	209053	199788	201473	186174
Q61301	sp|Q61301|CTNA2_MOUSE	Ctnna2	1.78399	0.0450926	0.266177	7	443910	260779	223054	260910	149606	105525	173172	243282
Q9Z0X1	sp|Q9Z0X1|AIFM1_MOUSE	Aifm1	0.538501	0.0451157	0.266276	4	85200.9	110255	49718.9	95128.1	250242	132510	112998	141009
P63101	sp|P63101|1433Z_MOUSE	Ywhaz	1.24829	0.0458226	0.26659	14	3.63449e+06	4.16105e+06	4.35502e+06	3.96555e+06	3.82727e+06	2.77549e+06	3.54603e+06	2.85563e+06
Q9CRC8	sp|Q9CRC8|LRC40_MOUSE	Lrrc40	0.259589	0.0458362	0.26684	1	24180.1	2534.86	18500.5	6080.6	25912.6	43045	30677.1	44376.3
Q61205	sp|Q61205|PA1B3_MOUSE	Pafah1b3	0.642281	0.0459659	0.267319	1	38754.1	28564.8	29358.4	28254.3	34312.7	69364.8	40202.6	56392
Q6URW6	sp|Q6URW6|MYH14_MOUSE	Myh14	2.47595	0.0461193	0.267319	1	15692.1	7634.32	11102.1	9858.74	5109.26	1758.07	4556.43	8524.95
Q04690	sp|Q04690|NF1_MOUSE	Nf1	0.658886	0.0464355	0.268604	1	30650.3	35624.8	42097.5	42752.7	43653	54762.5	50509.5	86356.7
P50247	sp|P50247|SAHH_MOUSE	Ahcy	0.848448	0.0465686	0.268604	3	230274	182405	207706	198961	254758	250133	249506	210677
Q6X893	sp|Q6X893|CTL1_MOUSE	Slc44a1	0.822604	0.0468746	0.269707	2	109107	113141	86262.7	109198	129193	134989	109833	132580
O54984	sp|O54984|ASNA_MOUSE	Asna1	0.576187	0.0468871	0.269795	2	166839	157904	137250	147705	200591	171588	317087	443984
Q62443	sp|Q62443|NPTX1_MOUSE	Nptx1	1.94378	0.047075	0.269795	1	42314.6	54964.7	45621.8	46739.8	16733.2	18320.1	21694	52239.8
P21279	sp|P21279|GNAQ_MOUSE	Gnaq	1.16259	0.0471603	0.272167	5	829834	639262	780276	754009	683857	611058	645279	633570
Q5U430	sp|Q5U430|UBR3_MOUSE	Ubr3	5.84756	0.0472746	0.272167	1	39131.9	27579.6	19931.3	24807.1	15755.9	1237.49	1559.76	15006.8
Q8R5H6	sp|Q8R5H6|WASF1_MOUSE	Wasf1	1.66959	0.0481712	0.272167	5	688200	421500	498157	366171	310610	180955	351348	344828
Q01768	sp|Q01768|NDKB_MOUSE	Nme2	1.59223	0.0482298	0.27218	4	349098	613295	578940	615682	385975	350523	388599	225843
P58252	sp|P58252|EF2_MOUSE	Eef2	1.13225	0.0494783	0.272738	18	2.35657e+06	2.04719e+06	2.29798e+06	2.05641e+06	1.99503e+06	2.01416e+06	1.98492e+06	1.73917e+06
Q8CCF0	sp|Q8CCF0|PRP31_MOUSE	Prpf31	4.3146	0.0498935	0.272738	1	6500.98	16147	20571.4	26664.5	4260.21	867.379	4495.54	10002
Q8VCW8	sp|Q8VCW8|ACSF2_MOUSE	Acsf2	1.29185	0.0499996	0.272738	3	213985	179073	247962	236211	209086	149659	153475	167799
P00405	sp|P00405|COX2_MOUSE	Mtco2	1.93358	0.0500406	0.272738	3	507495	1.26635e+06	1.26226e+06	1.18693e+06	650183	621214	508046	335687
O55234	sp|O55234|PSB5_MOUSE	Psmb5	1.23942	0.0501972	0.272738	1	48171.6	48879.5	51238.5	40947.2	41904.3	32550	34761.2	44153.3
Q8CHC4	sp|Q8CHC4|SYNJ1_MOUSE	Synj1	0.926098	0.0504517	0.272738	27	3.46618e+06	3.53357e+06	3.53918e+06	3.62491e+06	4.17416e+06	3.64084e+06	3.75298e+06	3.74534e+06
Q6ZWX6	sp|Q6ZWX6|IF2A_MOUSE	Eif2s1	1.47553	0.0505663	0.272738	1	26673.4	19322.2	16892.8	18228.7	13737.3	9490.16	16360.9	15697.2
Q9WTU6	sp|Q9WTU6|MK09_MOUSE	Mapk9	0.816834	0.0511958	0.276476	1	1.05755e+06	829530	1.00778e+06	833650	1.21021e+06	1.02502e+06	1.2772e+06	1.04496e+06
Q9CQM9	sp|Q9CQM9|GLRX3_MOUSE	Glrx3	0.761974	0.0515153	0.276476	1	87581.8	118901	129687	101288	154232	157401	144589	115606
Q9DBR3	sp|Q9DBR3|ARMC8_MOUSE	Armc8	1.48429	0.0519078	0.282733	1	34899.3	35643.3	40726.7	33882.2	25646.2	34409.9	15990.9	25060.6
P84075	sp|P84075|HPCA_MOUSE	Hpca	1.3361	0.0524412	0.283244	6	957852	704649	758124	772921	461996	562364	738668	646682
Q62420	sp|Q62420|SH3G2_MOUSE	Sh3gl2	1.3817	0.0526709	0.283244	6	577035	934176	913323	728336	496579	565242	685279	511492
Q8BMF4	sp|Q8BMF4|ODP2_MOUSE	Dlat	0.842368	0.0530923	0.283244	7	702034	804374	701131	820791	773871	865584	975259	987970
Q9WTP7	sp|Q9WTP7|KAD3_MOUSE	Ak3	0.417846	0.0532805	0.283244	2	28583.6	122435	59851.7	109622	133761	144970	252380	153911
Q8K021	sp|Q8K021|SCAM1_MOUSE	Scamp1	1.87345	0.0537786	0.283549	2	154993	131852	139808	110023	55953.7	52654.6	57279.6	151207
O08756	sp|O08756|HCD2_MOUSE	Hsd17b10	1.63616	0.0553015	0.283549	1	46710.6	64828.2	66408.4	72738.7	48908	54878.6	27588	27565.1
O54865	sp|O54865|GCYB1_MOUSE	Gucy1b1	1.44093	0.0554637	0.286188	3	213229	132329	204267	181400	109058	161352	138333	99633.3
Q9CQQ7	sp|Q9CQQ7|AT5F1_MOUSE	Atp5pb	0.72933	0.0556803	0.287082	6	459209	814478	617892	736673	947490	861548	940943	783366
P70296	sp|P70296|PEBP1_MOUSE	Pebp1	1.33686	0.0557946	0.288376	6	997973	904165	843025	1.0419e+06	608946	686423	979469	606081
Q8BSS9	sp|Q8BSS9|LIPA2_MOUSE	Ppfia2	0.571807	0.0559971	0.290444	2	35106.7	21084.1	27070.2	27526.8	63460.7	50097.8	25759.9	62998.1
Q60854	sp|Q60854|SPB6_MOUSE	Serpinb6	0.857662	0.0567374	0.290821	2	147431	127520	128310	122425	140007	140110	170188	163489
P47809	sp|P47809|MP2K4_MOUSE	Map2k4	1.44231	0.0567769	0.292251	2	125696	130939	135084	144780	106173	130718	64518	83069.4
P50516	sp|P50516|VATA_MOUSE	Atp6v1a	1.26413	0.0574036	0.292393	24	4.84817e+06	5.36805e+06	4.84265e+06	5.35687e+06	4.71769e+06	4.01683e+06	3.08492e+06	4.52239e+06
O88738	sp|O88738|BIRC6_MOUSE	Birc6	1.93848	0.0581637	0.294229	1	34956.3	34997.8	29971.5	20385.4	17793.5	7152.57	19647.1	21170.3
Q9D051	sp|Q9D051|ODPB_MOUSE	Pdhb	1.20352	0.058641	0.301593	8	1.16548e+06	1.53202e+06	1.56348e+06	1.45734e+06	1.25438e+06	1.21665e+06	1.21909e+06	1.04228e+06
Q9Z0H4	sp|Q9Z0H4|CELF2_MOUSE	Celf2	0.557547	0.0589451	0.301593	1	72679.4	56447.5	33744.3	50255.8	118994	52944.6	121770	93849.2
P68254	sp|P68254|1433T_MOUSE	Ywhaq	1.38697	0.0589557	0.301593	8	903742	1.24669e+06	1.25131e+06	1.12787e+06	1.12589e+06	666596	700664	817128
P62073	sp|P62073|TIM10_MOUSE	Timm10	0.42625	0.0593729	0.301593	1	2403.69	5134.26	12393.9	5314.53	9069.3	11153.9	18499.6	13158.6
P17182	sp|P17182|ENOA_MOUSE	Eno1	1.21594	0.0594121	0.301781	15	4.22248e+06	5.73151e+06	4.23993e+06	5.44223e+06	4.11944e+06	3.96537e+06	4.16914e+06	3.75103e+06
P63028	sp|P63028|TCTP_MOUSE	Tpt1	5.94929	0.0600042	0.304162	1	140903	103566	93899.8	88931.5	52002.5	1867.12	39970.9	25064.6
B2RQC6	sp|B2RQC6|PYR1_MOUSE	Cad	2.77491	0.0607036	0.304162	1	65693	78148.3	70302.3	53902.7	9288.46	28308.5	17100.5	72971
Q9D2U9	sp|Q9D2U9|H2B3A_MOUSE	Hist3h2ba	0.73571	0.0609285	0.306607	2	359770	391173	359170	396396	390482	498563	730983	480580
Q8C7M3	sp|Q8C7M3|TRIM9_MOUSE	Trim9	2.14967	0.0610496	0.309748	1	50128.2	32823.1	28880.1	30193.3	6419.12	21235.4	20856.7	23632.2
A2BDX3	sp|A2BDX3|MOCS3_MOUSE	Mocs3	2.69376	0.0611631	0.311203	1	24104.9	27260.3	40049.1	13068.6	16829.5	10575	3156.25	11627.9
P60202	sp|P60202|MYPR_MOUSE	Plp1	0.718447	0.0614944	0.311203	11	1.80097e+07	2.92928e+07	2.56474e+07	2.52449e+07	3.93442e+07	3.94916e+07	3.17439e+07	2.59932e+07
P19536	sp|P19536|COX5B_MOUSE	Cox5b	1.6734	0.0616785	0.311203	1	43866	48793.1	41578.2	33325.9	30044.8	31027.1	30677.6	13225.1
Q8K1M6	sp|Q8K1M6|DNM1L_MOUSE	Dnm1l	1.23216	0.0622277	0.311784	22	3.34977e+06	2.80039e+06	2.91173e+06	2.86094e+06	2.32049e+06	2.2141e+06	2.14939e+06	3.06999e+06
Q5PR73	sp|Q5PR73|DIRA2_MOUSE	Diras2	0.734247	0.0624211	0.311784	4	388604	478888	449922	396538	463298	502534	816458	600946
Q9Z268	sp|Q9Z268|RASL1_MOUSE	Rasal1	1.64275	0.0626715	0.313976	4	238077	229312	218138	214897	157942	88810	106665	234876
A2AV25	sp|A2AV25|FBCD1_MOUSE	Fibcd1	0.306611	0.0628235	0.316361	1	4212.74	1451.13	2901.26	5873.21	10080.5	5984.2	5611.03	34822.1
P27601	sp|P27601|GNA13_MOUSE	Gna13	1.37745	0.0628602	0.316361	2	137160	85151	77684.8	89613.3	72327.5	75873.3	57461.3	71623.2
Q80YN3	sp|Q80YN3|BCAS1_MOUSE	Bcas1	0.660361	0.0640421	0.316361	2	116194	71230.6	77969.1	58290.5	114537	89571.2	125356	153809
Q9QXY6	sp|Q9QXY6|EHD3_MOUSE	Ehd3	1.36272	0.0643259	0.316361	5	214350	235967	267851	267290	200446	153518	140286	243253
Q60864	sp|Q60864|STIP1_MOUSE	Stip1	0.868077	0.0647509	0.317163	6	612523	650058	656914	533006	699573	642810	781849	698306
Q99JI4	sp|Q99JI4|PSMD6_MOUSE	Psmd6	3.53302	0.0666669	0.317203	1	35760.5	40332.4	27429.2	32616	22507.3	12144.1	1865.03	16245.7
Q9CR62	sp|Q9CR62|M2OM_MOUSE	Slc25a11	0.636219	0.0667107	0.318728	4	570614	450955	234524	484201	641334	600432	612254	756455
Q8K2M0	sp|Q8K2M0|RM38_MOUSE	Mrpl38	0.444773	0.0674733	0.318728	1	13998.9	20995.5	8697.9	18258.6	78350.2	18354.1	30478.5	27213.3
Q9JM76	sp|Q9JM76|ARPC3_MOUSE	Arpc3	1.38381	0.0676079	0.318728	4	231676	396708	319944	355465	200701	291176	201657	241881
Q7TMS5	sp|Q7TMS5|ABCG2_MOUSE	Abcg2	1.67306	0.067618	0.318728	1	46328.1	43326.3	46923.4	46441.8	14176.8	33040.8	28978.4	41129.2
P53026	sp|P53026|RL10A_MOUSE	Rpl10a	1.37626	0.067872	0.318728	3	115946	189591	166158	213153	139528	105633	120755	121933
P68368	sp|P68368|TBA4A_MOUSE	Tuba4a	1.21636	0.0689483	0.323808	10	2.14914e+07	1.67676e+07	2.00238e+07	1.81665e+07	1.59628e+07	1.41488e+07	1.40192e+07	1.89124e+07
Q9CQ60	sp|Q9CQ60|6PGL_MOUSE	Pgls	1.83783	0.0689938	0.324332	1	92196.9	105237	91724	83300	68692.5	28331.4	36622.1	91174.5
Q9QYC0	sp|Q9QYC0|ADDA_MOUSE	Add1	1.22918	0.0692173	0.325563	13	1.06276e+06	1.10238e+06	1.23727e+06	949919	1.01784e+06	811788	983634	742165
Q9JM63	sp|Q9JM63|KCJ10_MOUSE	Kcnj10	0.400278	0.0692902	0.333458	1	34484.3	11364.8	23199.4	32463.7	31393.6	51529.6	48465.7	146650
Q7TMC8	sp|Q7TMC8|FCSK_MOUSE	Fcsk	1.50379	0.0695144	0.333458	1	53038.9	29486.2	37504.1	36759.8	18462.8	28735.2	22664.5	35064.4
Q99K85	sp|Q99K85|SERC_MOUSE	Psat1	0.758332	0.0696654	0.333458	8	543163	739456	636711	553902	786730	798112	1.06117e+06	642845
Q11011	sp|Q11011|PSA_MOUSE	Npepps	1.14916	0.0697667	0.333458	19	2.90578e+06	3.002e+06	3.36058e+06	2.9622e+06	2.94676e+06	2.79107e+06	2.64069e+06	2.29272e+06
P70175	sp|P70175|DLG3_MOUSE	Dlg3	0.50601	0.0701594	0.333458	4	90181.1	75110.5	132480	86392	267988	144171	325170	94123.8
P48320	sp|P48320|DCE2_MOUSE	Gad2	0.788173	0.0706199	0.333458	5	150576	159570	125887	170586	236146	192983	154487	189914
P38060	sp|P38060|HMGCL_MOUSE	Hmgcl	2.91033	0.0706832	0.333458	1	31739.7	18320.3	21045.1	26191.6	10339.8	2975	5396.54	26913.1
P62889	sp|P62889|RL30_MOUSE	Rpl30	2.00754	0.0711669	0.333797	1	133629	87124.4	77626.6	81812.2	58349	87912.1	22105.2	40145
Q80TZ3	sp|Q80TZ3|AUXI_MOUSE	Dnajc6	1.24829	0.0719454	0.336676	9	677241	851791	987389	811068	741687	737428	597167	582542
Q7TSQ8	sp|Q7TSQ8|PDPR_MOUSE	Pdpr	0.709147	0.0719674	0.336676	1	60809.8	54933.7	57927.2	44480.4	50470.8	80549.6	89113.7	93944.2
Q8R570	sp|Q8R570|SNP47_MOUSE	Snap47	0.710154	0.0720231	0.336676	6	393671	200481	332443	315691	383720	508154	399864	417691
Q9ER35	sp|Q9ER35|FN3K_MOUSE	Fn3k	0.688573	0.0725226	0.336676	1	2482.57	1475.7	2511.8	3334.35	3448.22	3246.11	3357.75	3631.53
Q9WUL7	sp|Q9WUL7|ARL3_MOUSE	Arl3	0.68327	0.0729912	0.336676	2	67440	133628	119185	133289	137753	188168	157386	161008
Q8R0Y6	sp|Q8R0Y6|AL1L1_MOUSE	Aldh1l1	1.09535	0.0731853	0.336676	13	1.16909e+06	988674	1.10122e+06	1.05557e+06	919672	1.01131e+06	990627	1.01305e+06
Q8BYI9	sp|Q8BYI9|TENR_MOUSE	Tnr	0.780053	0.0735862	0.336676	21	2.13073e+06	1.81102e+06	1.3294e+06	1.9517e+06	2.15097e+06	2.05212e+06	2.37087e+06	2.5839e+06
Q8VE33	sp|Q8VE33|GD1L1_MOUSE	Gdap1l1	1.39909	0.0743334	0.337665	2	282278	206545	253935	223162	162179	163529	129127	251795
Q61290	sp|Q61290|CAC1E_MOUSE	Cacna1e	0.365353	0.0750068	0.338377	2	376627	70927.1	73212.4	53114.6	184423	269904	338195	346323
P42567	sp|P42567|EPS15_MOUSE	Eps15	3.23699	0.0751554	0.338377	1	23096.3	17092.9	19025.8	20736.9	11352.1	2464.98	20710.7	2447.91
Q8BRT1	sp|Q8BRT1|CLAP2_MOUSE	Clasp2	1.29496	0.0753422	0.339789	13	619692	534804	646254	496862	396379	466185	357048	573581
Q80X80	sp|Q80X80|C2C2L_MOUSE	C2cd2l	1.47103	0.0753533	0.341162	3	70739.2	105077	100456	72173.7	40839.1	51607.5	72748.7	75063.1
Q61033	sp|Q61033|LAP2A_MOUSE	Tmpo	0.241332	0.0756181	0.341162	1	5470.3	79242.6	15589.4	4488.37	42298.8	59504.9	61860.2	57429.3
P20357	sp|P20357|MTAP2_MOUSE	Map2	1.21889	0.0765154	0.341162	25	3.24965e+06	2.50845e+06	2.82726e+06	2.38985e+06	2.08811e+06	1.94034e+06	2.47371e+06	2.4897e+06
P47934	sp|P47934|CACP_MOUSE	Crat	2.4083	0.0772438	0.342626	1	61688	19987.1	10036.6	22729	8346.9	10850.6	6406.78	14409.6
Q9WUM5	sp|Q9WUM5|SUCA_MOUSE	Suclg1	0.684821	0.0772757	0.343937	5	1.18751e+06	1.24788e+06	638032	1.27055e+06	1.7026e+06	1.60741e+06	1.26808e+06	1.57379e+06
P99024	sp|P99024|TBB5_MOUSE	Tubb5	1.34557	0.0784547	0.343952	6	8.07168e+06	5.45368e+06	5.58892e+06	5.29423e+06	4.50182e+06	3.83416e+06	3.90786e+06	5.89055e+06
Q6NS60	sp|Q6NS60|FBX41_MOUSE	Fbxo41	1.91199	0.0784786	0.344935	2	248788	108235	142510	103878	57452.9	66487	53617.7	145637
Q8CGK3	sp|Q8CGK3|LONM_MOUSE	Lonp1	1.23884	0.078603	0.347533	8	1.33606e+06	1.10893e+06	1.08272e+06	1.01961e+06	816016	1.00355e+06	774059	1.09548e+06
Q9DBU0	sp|Q9DBU0|TM9S1_MOUSE	Tm9sf1	1.40917	0.0790839	0.348678	1	6.58582e+06	4.15489e+06	4.59723e+06	4.68129e+06	2.54731e+06	4.00588e+06	3.21422e+06	4.55327e+06
P63085	sp|P63085|MK01_MOUSE	Mapk1	1.15351	0.0792188	0.348678	9	949654	882297	779250	948255	813848	694737	722368	856200
Q9JJK2	sp|Q9JJK2|LANC2_MOUSE	Lancl2	1.67025	0.0798133	0.348678	4	378825	371129	297627	323129	133082	206639	160482	393661
O55131	sp|O55131|SEPT7_MOUSE	Septin7	1.1321	0.0799069	0.348678	11	1.40498e+06	1.32302e+06	1.2122e+06	1.31558e+06	1.2956e+06	1.01422e+06	1.16041e+06	1.18352e+06
Q9DCD0	sp|Q9DCD0|6PGD_MOUSE	Pgd	1.12119	0.0804993	0.349006	8	522195	441544	528825	466758	462669	457398	420043	405169
P05202	sp|P05202|AATM_MOUSE	Got2	1.1041	0.0810129	0.352245	18	5.96407e+06	6.50217e+06	5.8874e+06	6.40082e+06	5.80639e+06	6.16151e+06	5.18459e+06	5.3017e+06
Q8CCB4	sp|Q8CCB4|VPS53_MOUSE	Vps53	1.4244	0.0810764	0.353934	2	50273.4	65843.2	77802	73340.4	44372.1	57882.5	56169	31805.8
Q9QZE5	sp|Q9QZE5|COPG1_MOUSE	Copg1	0.625836	0.082143	0.353934	2	56885.2	53199.6	24080.2	33608.8	59010	71248.1	76466.3	49660.5
P51855	sp|P51855|GSHB_MOUSE	Gss	1.19055	0.0822975	0.357286	1	37147.5	30197.6	27564.4	33002.9	29072	22848.2	28407.6	26918.7
Q9QWY8	sp|Q9QWY8|ASAP1_MOUSE	Asap1	1.29617	0.0824895	0.357286	3	203804	145041	174889	141997	113563	151699	144558	104432
O08539	sp|O08539|BIN1_MOUSE	Bin1	1.57853	0.0830459	0.357286	4	191178	183311	203223	162261	77832.9	108442	103062	213964
Q3THS6	sp|Q3THS6|METK2_MOUSE	Mat2a	0.851564	0.0837	0.358276	1	67437	55862.9	52611	53887.6	58672.8	66504.2	75982.8	68504.4
P39054	sp|P39054|DYN2_MOUSE	Dnm2	1.2037	0.0849553	0.358276	2	116415	106005	112091	121107	100804	113129	75470.5	92719.2
P53810	sp|P53810|PIPNA_MOUSE	Pitpna	1.32785	0.0853188	0.359581	3	258088	198513	195559	198042	175620	139191	123368	211646
Q3UGS4	sp|Q3UGS4|MCRI1_MOUSE	Mcrip1	0.512349	0.0856022	0.359581	1	21602.8	23807.9	20916.4	10534.7	39682.7	37553.9	63187.6	17465.7
Q6PB66	sp|Q6PB66|LPPRC_MOUSE	Lrpprc	1.24709	0.0856171	0.361343	9	824213	588903	914460	750684	622385	678910	528585	616783
Q9JLM8	sp|Q9JLM8|DCLK1_MOUSE	Dclk1	1.15794	0.085914	0.362128	13	916823	1.01932e+06	1.02723e+06	996202	766491	794836	1.03284e+06	845362
Q3TDD9	sp|Q3TDD9|PPR21_MOUSE	Ppp1r21	0.357452	0.0866022	0.362128	1	21711.1	7160.11	3674.57	3413.35	40588.9	13083.3	15627.2	14391.6
Q7TMY8	sp|Q7TMY8|HUWE1_MOUSE	Huwe1	1.57706	0.087289	0.365717	2	231371	91217.3	114770	108520	66332	86148.8	74615.4	99662.8
Q9EQQ9	sp|Q9EQQ9|OGA_MOUSE	Oga	1.32279	0.0874794	0.365717	3	224441	214607	251285	202018	198233	115031	197755	177099
P47962	sp|P47962|RL5_MOUSE	Rpl5	2.34859	0.087516	0.365717	1	34413.7	58623.5	44684.6	33815.3	36920.7	28061.1	6093.69	15870.3
O88544	sp|O88544|CSN4_MOUSE	Cops4	1.29725	0.0877513	0.367279	7	457093	380811	426138	381640	348249	296456	412106	234947
Q80TV8	sp|Q80TV8|CLAP1_MOUSE	Clasp1	3.15559	0.0879505	0.369265	1	17622.5	7496.21	11258.4	14199.4	9340.9	858.846	3708.35	7158.95
Q8VD75	sp|Q8VD75|HIP1_MOUSE	Hip1	2.28908	0.088113	0.373886	1	48117.4	9214.19	43115	32361.3	12686.9	8721.46	17627.1	11551.6
Q505F5	sp|Q505F5|LRC47_MOUSE	Lrrc47	1.41785	0.0881365	0.374055	2	181608	115956	162176	105365	107549	70599	99875.6	117418
O70589	sp|O70589|CSKP_MOUSE	Cask	1.88971	0.0889728	0.374055	2	89273.9	92036.9	74455.8	120152	88791.3	55877.7	54235.1	21421.2
Q9WUA2	sp|Q9WUA2|SYFB_MOUSE	Farsb	1.16044	0.0897691	0.374055	2	160358	143631	169561	156837	112521	148744	147739	136600
Q921H9	sp|Q921H9|COA7_MOUSE	Coa7	2.39846	0.0898357	0.374444	1	2482.32	9847.56	7656.44	3371.41	4196.39	1144.18	2518.3	1576.94
Q64521	sp|Q64521|GPDM_MOUSE	Gpd2	1.21851	0.0904463	0.376531	15	1.55484e+06	1.37454e+06	1.37418e+06	1.34147e+06	1.04639e+06	973719	1.18253e+06	1.48323e+06
Q9CQW1	sp|Q9CQW1|YKT6_MOUSE	Ykt6	1.48423	0.0908875	0.376831	2	71651.2	78412.5	92251.9	75555.9	43995.3	86875.1	57910.7	36458
Q60930	sp|Q60930|VDAC2_MOUSE	Vdac2	0.823815	0.0910488	0.376831	2	203793	151629	165761	150953	173652	204464	197548	239334
Q80U28	sp|Q80U28|MADD_MOUSE	Madd	1.2574	0.0919301	0.376831	7	469393	456813	345754	433235	299953	397984	277468	387917
Q8CBY8	sp|Q8CBY8|DCTN4_MOUSE	Dctn4	2.49995	0.0919527	0.376831	1	33960.4	57203.4	41086.5	61381.6	6966.71	13823.8	23819.8	54678
P56480	sp|P56480|ATPB_MOUSE	Atp5f1b	0.804949	0.0920215	0.376831	24	8.02972e+06	9.24783e+06	6.04897e+06	9.74747e+06	1.01636e+07	1.00911e+07	1.05241e+07	9.66209e+06
Q91V09	sp|Q91V09|WDR13_MOUSE	Wdr13	0.448148	0.0926494	0.376831	2	13580	64104	50873.7	81405.8	96262.1	103397	100939	88967.7
Q9QXZ0	sp|Q9QXZ0|MACF1_MOUSE	Macf1	0.625263	0.0927861	0.376831	5	209424	130662	111474	114395	151233	181244	352864	236041
P62984	sp|P62984|RL40_MOUSE	Uba52	1.1167	0.0931715	0.379505	4	670554	743995	646221	728165	667479	640132	645248	547562
Q6P4S6	sp|Q6P4S6|SIK3_MOUSE	Sik3	1.23866	0.0933795	0.381378	1	32020.5	29713.2	27366.9	28403.6	27718.3	18599	28342.8	21501.5
Q8VCM8	sp|Q8VCM8|NCLN_MOUSE	Ncln	0.594399	0.0938426	0.381378	2	32442.5	44446.8	28221	46626.6	69555.7	34241.6	60799.2	104969
Q8BI08	sp|Q8BI08|MAL2_MOUSE	Mal2	1.15708	0.0948353	0.383067	1	153753	142771	170299	174630	124902	162713	133367	134369
P14733	sp|P14733|LMNB1_MOUSE	Lmnb1	0.434092	0.0952523	0.383812	1	11735.9	18382.3	11571.1	16179.9	23519.6	12085.4	65843.4	60776.2
O55100	sp|O55100|SNG1_MOUSE	Syngr1	0.869857	0.0955004	0.383812	2	395833	464581	457187	474268	547071	582459	482338	453147
Q62348	sp|Q62348|TSN_MOUSE	Tsn	1.80233	0.0956844	0.385206	1	48723.1	40777.4	17200	37911.4	14260.1	13799.9	31085.3	20070.7
P48318	sp|P48318|DCE1_MOUSE	Gad1	1.23234	0.0957977	0.385206	4	157645	160798	150013	142268	138217	91919.9	127935	144317
Q80TG9	sp|Q80TG9|LRFN2_MOUSE	Lrfn2	0.242282	0.0963759	0.385206	1	1700.61	30266.2	3838.21	8889.08	21969.2	34370.6	63060.5	10702.9
Q921M7	sp|Q921M7|FA49B_MOUSE	Fam49b	1.45489	0.0965305	0.386609	5	323422	661293	599257	381555	255053	361423	345587	342619
Q9QUH0	sp|Q9QUH0|GLRX1_MOUSE	Glrx	0.543275	0.0967297	0.386609	2	31321.2	93749.5	87845	125769	124756	123857	152499	158039
Q8R1M2	sp|Q8R1M2|H2AJ_MOUSE	H2afj	0.747785	0.0975988	0.387288	3	151074	141838	141958	230585	195947	198143	285650	202262
O35465	sp|O35465|FKBP8_MOUSE	Fkbp8	1.6938	0.0976167	0.387288	2	86273.3	68450.3	54798.3	59027	20375.7	47344.5	66353	36255.7
Q9Z2Y3	sp|Q9Z2Y3|HOME1_MOUSE	Homer1	0.55	0.097939	0.388314	2	54559.8	54307.1	35618.4	67309	45524.5	105365	172139	94016.4
Q9D8N0	sp|Q9D8N0|EF1G_MOUSE	Eef1g	0.850896	0.0985019	0.391522	4	325697	349234	310557	273285	417225	405517	336728	323238
Q6P9Q6	sp|Q6P9Q6|FKB15_MOUSE	Fkbp15	3.36644	0.0985786	0.3919	1	30121.2	130764	93124	62929.8	12253.8	10063.8	14422	101050
Q923T9	sp|Q923T9|KCC2G_MOUSE	Camk2g	0.810246	0.0988978	0.3919	3	190378	242961	304918	216911	274193	326363	288173	275258
P62880	sp|P62880|GBB2_MOUSE	Gnb2	1.16703	0.0989729	0.3919	6	2.10063e+06	2.55813e+06	2.5038e+06	2.12859e+06	1.99532e+06	2.2169e+06	1.67805e+06	2.08005e+06
P19096	sp|P19096|FAS_MOUSE	Fasn	1.14453	0.0990347	0.3919	26	2.39468e+06	2.87018e+06	2.89256e+06	2.81976e+06	2.28779e+06	2.33107e+06	2.19672e+06	2.78868e+06
Q80VP1	sp|Q80VP1|EPN1_MOUSE	Epn1	2.92948	0.0996929	0.393033	1	37701	39932.6	70781.9	35907.4	18727	31142	3192.12	27908.1
P68510	sp|P68510|1433F_MOUSE	Ywhah	1.21257	0.100017	0.393033	6	909162	1.09074e+06	1.14462e+06	1.07909e+06	1.03248e+06	744554	977722	753807
Q7TNG5	sp|Q7TNG5|EMAL2_MOUSE	Eml2	0.739498	0.100163	0.393033	1	24821.2	39008.8	46833.9	37883.8	57371.9	46362.2	40354.5	53517.4
P97351	sp|P97351|RS3A_MOUSE	Rps3a	1.8572	0.100257	0.394854	4	172882	180762	154818	165351	188241	113073	75069	42083.9
A2ALU4	sp|A2ALU4|SHRM2_MOUSE	Shroom2	0.406035	0.10073	0.394854	3	32540.1	113378	149332	58108.8	152503	258645	354107	84328.5
P52480	sp|P52480|KPYM_MOUSE	Pkm	1.22005	0.100871	0.395093	36	1.87405e+07	2.32399e+07	2.44363e+07	2.48977e+07	2.31394e+07	1.86613e+07	1.72785e+07	1.60289e+07
Q99MR8	sp|Q99MR8|MCCA_MOUSE	Mccc1	0.794136	0.100871	0.395093	2	72715	60459.3	80982	74216.1	96549.7	91631.4	110319	68069.1
P61087	sp|P61087|UBE2K_MOUSE	Ube2k	0.549752	0.100968	0.395093	1	28101.1	43831.1	40259	45384.9	57176	39032.6	71844.5	153666
O35417	sp|O35417|PDYN_MOUSE	Pdyn	0.409661	0.101306	0.395093	1	62920.3	22420	17149.9	27004.1	35184.2	51606	65813.4	194114
Q641P0	sp|Q641P0|ARP3B_MOUSE	Actr3b	1.57151	0.101863	0.395093	4	149263	190230	171429	159500	88498.3	61731.7	174298	133682
Q8CGA0	sp|Q8CGA0|PPM1F_MOUSE	Ppm1f	1.94584	0.101941	0.395093	2	97226.5	128437	136831	145113	137957	39032.9	34890.3	92057.2
Q9R1V7	sp|Q9R1V7|ADA23_MOUSE	Adam23	0.736099	0.102183	0.395093	2	123281	91970.1	77148	151641	132803	168694	143702	140335
Q9WV18	sp|Q9WV18|GABR1_MOUSE	Gabbr1	3.40259	0.102394	0.395093	1	7669.01	23672.3	38221.4	33472.6	18061.8	2601.16	2661.81	13855.8
P50136	sp|P50136|ODBA_MOUSE	Bckdha	0.761792	0.102856	0.395093	1	7389.41	6304.78	6757.46	6559.29	12105.3	6924.64	7132.3	10255.9
Q3TXS7	sp|Q3TXS7|PSMD1_MOUSE	Psmd1	3.38755	0.10313	0.395093	2	56181.5	26360.4	15456.3	40154	4655.4	10140.9	3377.87	43768.7
Q9Z130	sp|Q9Z130|HNRDL_MOUSE	Hnrnpdl	0.221137	0.103753	0.395093	1	2155.52	9160.79	42294	67072.3	81656.2	62534.3	55594.8	82513.4
Q80ZJ6	sp|Q80ZJ6|ZER1_MOUSE	Zer1	1.72447	0.104813	0.395093	1	33545.1	33096.9	35289.8	26281.9	23612.6	9764.74	14513.2	34796.7
Q8QZT1	sp|Q8QZT1|THIL_MOUSE	Acat1	0.900708	0.105036	0.395093	13	2.37687e+06	2.36435e+06	2.14138e+06	2.22163e+06	2.4852e+06	2.35243e+06	2.38829e+06	2.90925e+06
O88685	sp|O88685|PRS6A_MOUSE	Psmc3	1.18761	0.106695	0.395093	2	173573	135494	140584	137595	100646	125547	138254	130907
O08749	sp|O08749|DLDH_MOUSE	Dld	1.0705	0.107303	0.395093	12	1.48556e+06	1.66562e+06	1.46219e+06	1.62688e+06	1.50061e+06	1.40251e+06	1.43413e+06	1.48494e+06
Q07076	sp|Q07076|ANXA7_MOUSE	Anxa7	0.701851	0.107575	0.395554	6	542930	348024	292410	371423	462094	399802	685659	667652
Q3UMT1	sp|Q3UMT1|PP12C_MOUSE	Ppp1r12c	0.30557	0.107578	0.396316	1	14872.3	5674.53	1636.9	13844.4	28155.7	7562.21	38071	27061.4
P58771	sp|P58771|TPM1_MOUSE	Tpm1	0.279193	0.107796	0.396316	1	9533	25915.3	3523.19	6075.48	33082.7	58006.3	67358.7	6733.11
P06801	sp|P06801|MAOX_MOUSE	Me1	1.64865	0.107969	0.396365	2	107119	106898	107359	66891.5	61396.9	39511.6	41574.6	110364
Q99PL6	sp|Q99PL6|UBXN6_MOUSE	Ubxn6	1.87209	0.108797	0.396365	2	123555	77063.1	79595.5	89984.2	54564	54464.1	20325.5	91916.9
O88643	sp|O88643|PAK1_MOUSE	Pak1	1.32126	0.109635	0.397297	2	144686	201783	200927	192549	174759	107775	116180	169374
P08113	sp|P08113|ENPL_MOUSE	Hsp90b1	0.824859	0.109679	0.397502	9	726707	896649	710832	679228	1.03346e+06	739043	856333	1.03906e+06
Q9CYT6	sp|Q9CYT6|CAP2_MOUSE	Cap2	1.18961	0.10973	0.39905	6	310940	433317	354830	373682	277459	289357	302365	367470
Q8CBF3	sp|Q8CBF3|EPHB1_MOUSE	Ephb1	1.6797	0.109765	0.402266	1	44739.6	21500.1	21067.7	17380.8	15466.8	9780.88	12636.1	23147.5
Q8VE47	sp|Q8VE47|UBA5_MOUSE	Uba5	2.88598	0.109825	0.402266	1	51396.9	27769.6	19876	37119.5	4727.93	6881.51	9098.57	51278.6
P12787	sp|P12787|COX5A_MOUSE	Cox5a	0.610919	0.109979	0.407752	1	28911.7	36497.3	38934.7	15371.6	34888.3	36252.1	54477.2	65800.8
Q61879	sp|Q61879|MYH10_MOUSE	Myh10	0.880129	0.110409	0.408286	22	1.35447e+06	1.32027e+06	1.3992e+06	1.37534e+06	1.51784e+06	1.42934e+06	1.40543e+06	1.8809e+06
Q9JJZ2	sp|Q9JJZ2|TBA8_MOUSE	Tuba8	1.77953	0.110881	0.408286	2	41093.8	149542	110204	141837	52470.1	47279.3	64658.9	59716.1
P06837	sp|P06837|NEUM_MOUSE	Gap43	0.403574	0.1113	0.408286	3	13522.5	4120.36	1469.68	3145.05	14108.7	6833.54	11332.7	8885.51
Q64727	sp|Q64727|VINC_MOUSE	Vcl	0.690348	0.111588	0.408286	4	143649	102371	81157.2	114954	159861	117262	132644	242926
Q9Z2W8	sp|Q9Z2W8|GRIA4_MOUSE	Gria4	3.9111	0.114818	0.408286	1	15412.2	34416.6	43646.6	43166.6	2765.34	34397.9	20611	2178.5
P01942	sp|P01942|HBA_MOUSE	Hba	1.26268	0.115052	0.409859	4	356576	527235	315475	487467	329299	352798	321416	304582
P61202	sp|P61202|CSN2_MOUSE	Cops2	1.39807	0.115125	0.409859	3	169169	179823	354735	192168	170793	168525	137080	137572
E9Q401	sp|E9Q401|RYR2_MOUSE	Ryr2	1.37597	0.115146	0.409859	12	453904	418604	587692	502827	269134	400033	521253	279119
Q9D154	sp|Q9D154|ILEUA_MOUSE	Serpinb1a	0.607647	0.115572	0.409859	3	145118	99445	96535.1	272375	315154	178632	203318	243161
Q6PGN3	sp|Q6PGN3|DCLK2_MOUSE	Dclk2	2.12066	0.117111	0.409859	2	42486.1	35567.8	33012	28121.9	23343.5	7202.26	9856.39	41858.5
Q9D898	sp|Q9D898|ARP5L_MOUSE	Arpc5l	1.49459	0.117893	0.409859	1	44096.2	45025.7	74521.5	49215.2	26110.2	44702	50569.4	24724.8
Q9JII6	sp|Q9JII6|AK1A1_MOUSE	Akr1a1	1.27388	0.118202	0.409859	6	499824	426542	409468	404769	388409	244156	329295	429687
Q3UVX5	sp|Q3UVX5|GRM5_MOUSE	Grm5	1.25744	0.118563	0.41061	4	191857	154756	163782	132971	113655	130426	105031	166124
Q02053	sp|Q02053|UBA1_MOUSE	Uba1	1.2111	0.118918	0.411518	20	2.80409e+06	2.78675e+06	2.3949e+06	2.60376e+06	2.14031e+06	2.16088e+06	1.73922e+06	2.81572e+06
Q8JZR6	sp|Q8JZR6|S4A8_MOUSE	Slc4a8	1.61248	0.119971	0.412222	1	45519.1	28784.7	28230.3	21945.8	11308.4	15968.2	21299.1	31219.5
Q9WUM3	sp|Q9WUM3|COR1B_MOUSE	Coro1b	0.737483	0.120096	0.412441	2	63216.7	68669.8	65166.1	37832.2	65907.6	89688.5	93055.1	65775
Q9QY76	sp|Q9QY76|VAPB_MOUSE	Vapb	0.846657	0.120483	0.422123	2	101666	121105	138886	138943	136461	154703	166456	131581
Q9CQ85	sp|Q9CQ85|TIM22_MOUSE	Timm22	0.463042	0.121289	0.422123	1	6835.02	28991.5	27511.4	23728.1	19639.1	47123.2	63408.5	47951.5
Q6ZWN5	sp|Q6ZWN5|RS9_MOUSE	Rps9	0.810418	0.121313	0.422123	1	165471	108278	106166	134566	156141	146448	143711	180573
Q61171	sp|Q61171|PRDX2_MOUSE	Prdx2	1.15288	0.121724	0.422123	6	993860	1.14834e+06	938560	1.16332e+06	993947	962676	956583	770649
P08556	sp|P08556|RASN_MOUSE	Nras	0.566699	0.121796	0.422823	2	228954	173231	55462	172167	233484	241329	257280	253300
Q9DCC4	sp|Q9DCC4|P5CR3_MOUSE	Pycr3	0.687068	0.122625	0.427586	1	37418.3	24216.5	34331.2	25480	46774.6	33361.2	69943.6	32590.1
Q8BMI3	sp|Q8BMI3|GGA3_MOUSE	Gga3	1.86461	0.12273	0.429571	2	98636.2	30061.4	144043	73357.8	32681.2	48023.2	35730.9	46220.6
Q9QZ73	sp|Q9QZ73|DCNL1_MOUSE	Dcun1d1	0.353244	0.122908	0.429825	1	11879.5	74514.4	6594.31	11024.7	72133.7	62835	31536	28915.4
Q9Z224	sp|Q9Z224|MOC2A_MOUSE	Mocs2	0.334945	0.12319	0.430271	1	9109.62	5411.34	5251.74	38321.5	50280.8	11158.7	22531.3	62352.5
P24529	sp|P24529|TY3H_MOUSE	Th	2.57798	0.123327	0.43069	1	19135.2	6828.19	1744.33	13075.7	2724.23	2601.15	2905.02	3277.62
P61226	sp|P61226|RAP2B_MOUSE	Rap2b	1.42664	0.123818	0.433211	1	138413	93249.8	88653.8	84296.8	58027.5	64105.3	55684	112415
Q9QYB8	sp|Q9QYB8|ADDB_MOUSE	Add2	1.24171	0.124386	0.433211	6	468956	672222	662492	607062	530634	460811	570180	382516
P23116	sp|P23116|EIF3A_MOUSE	Eif3a	3.55942	0.124466	0.433737	1	37422.9	20316.1	17396.9	19723.6	8435.78	835.302	15009.8	15366.5
P63321	sp|P63321|RALA_MOUSE	Rala	0.754878	0.124637	0.434986	1	59672.1	101364	72923.7	83857.3	110793	118065	117280	74250.7
Q99J39	sp|Q99J39|DCMC_MOUSE	Mlycd	0.292085	0.124837	0.434986	1	3160.43	15338.2	22973.3	37384.6	44237.8	73471.1	115798	15197.9
Q8BH44	sp|Q8BH44|COR2B_MOUSE	Coro2b	1.43362	0.126117	0.434986	2	104064	96381.6	105469	97649.8	39783.3	70207.1	93802.4	93339.1
Q8C1B7	sp|Q8C1B7|SEP11_MOUSE	Septin11	1.13255	0.126182	0.434986	3	162190	222133	201310	208809	180032	172477	167584	176890
O55106	sp|O55106|STRN_MOUSE	Strn	0.585324	0.126793	0.436127	1	38149.4	32172.7	24419.8	41009.9	25115.1	75216.9	86626.1	63991.6
Q9WU28	sp|Q9WU28|PFD5_MOUSE	Pfdn5	1.72876	0.126917	0.436127	1	3565.1	2737.88	4832.07	4073.79	2417.35	1377.54	1403.16	4603.92
Q99KH8	sp|Q99KH8|STK24_MOUSE	Stk24	1.91327	0.126928	0.436127	1	29941.4	17445.6	21251.3	16837.3	13552.3	13627.6	18866.1	4003.14
Q8VBW6	sp|Q8VBW6|ULA1_MOUSE	Nae1	1.2368	0.127207	0.436127	2	45824.3	51208.3	67716.4	55106	50950.5	48860	43587.3	34488.6
Q9CZS1	sp|Q9CZS1|AL1B1_MOUSE	Aldh1b1	3.5457	0.127328	0.436127	1	37064.6	26560.4	40246.1	32042.7	19612.8	10365.8	1259.07	31379.4
Q08460	sp|Q08460|KCMA1_MOUSE	Kcnma1	3.08394	0.127452	0.436175	1	114186	51387.3	68107.1	52591.5	18487	39573	4339.11	73195.7
P16125	sp|P16125|LDHB_MOUSE	Ldhb	1.14896	0.127511	0.436324	13	7.13874e+06	8.07783e+06	9.86649e+06	7.7882e+06	7.96508e+06	6.82808e+06	6.9128e+06	6.76327e+06
A2A432	sp|A2A432|CUL4B_MOUSE	Cul4b	2.80208	0.127782	0.436324	1	13786.1	13644.6	23078.9	18185	13038	1412.37	4137.03	16809.6
Q9QXS1	sp|Q9QXS1|PLEC_MOUSE	Plec	0.763888	0.128108	0.436324	26	1.44863e+06	1.19405e+06	1.06883e+06	987882	1.39121e+06	1.17026e+06	1.53145e+06	2.1513e+06
P46471	sp|P46471|PRS7_MOUSE	Psmc2	1.15878	0.129504	0.436324	5	205679	276784	269070	204739	196088	210883	203964	206229
Q9CQR4	sp|Q9CQR4|ACO13_MOUSE	Acot13	0.785565	0.130774	0.438016	2	168776	184705	163442	201135	261077	238490	276977	156038
Q3TWN3	sp|Q3TWN3|CNNM2_MOUSE	Cnnm2	1.86444	0.131711	0.438016	1	14196.6	11965	10839.1	12336.9	7593.92	2515.25	7170.52	13724.6
Q8CHU3	sp|Q8CHU3|EPN2_MOUSE	Epn2	1.50712	0.132087	0.438016	3	98615.2	70493	90566	93427	83341.5	46267.6	85412.3	34616.2
Q71LX4	sp|Q71LX4|TLN2_MOUSE	Tln2	1.21947	0.132114	0.438016	6	395169	336478	346175	276872	230576	244171	320562	319309
Q3UTH8	sp|Q3UTH8|ARHG9_MOUSE	Arhgef9	1.27221	0.132701	0.438016	2	104673	65065.8	60907.2	61449.2	59700.8	52948.5	61312.5	50205.3
Q61207	sp|Q61207|SAP_MOUSE	Psap	0.33144	0.132801	0.438016	2	24658.9	28482.4	3912	57216.9	63214.7	31861.5	120825	53532
Q9DBR7	sp|Q9DBR7|MYPT1_MOUSE	Ppp1r12a	0.596233	0.133243	0.438016	1	2408.31	1519.89	2071.98	1104.61	2562.31	2647.36	1750.88	5581.56
Q8JZN7	sp|Q8JZN7|MIRO2_MOUSE	Rhot2	0.879379	0.133336	0.438016	1	50476	60744.5	55451.9	56817.7	54526.7	62960.8	74357.6	63282.5
Q8K0D5	sp|Q8K0D5|EFGM_MOUSE	Gfm1	1.24184	0.133712	0.438016	2	95307.4	77293.3	73805.1	87509.2	49573.7	83029.8	65802.1	73861.5
P14094	sp|P14094|AT1B1_MOUSE	Atp1b1	0.925869	0.134042	0.438108	8	3.84113e+06	4.45338e+06	4.02526e+06	4.49462e+06	4.63517e+06	4.763e+06	4.32115e+06	4.41461e+06
Q64133	sp|Q64133|AOFA_MOUSE	Maoa	0.693194	0.134199	0.438393	2	153393	65444.8	75232.1	81250.7	110601	139850	107275	160166
Q8BG32	sp|Q8BG32|PSD11_MOUSE	Psmd11	1.20352	0.134248	0.44233	4	197276	146963	146385	154587	125263	134986	112411	164519
Q8VDD5	sp|Q8VDD5|MYH9_MOUSE	Myh9	0.490416	0.134337	0.445821	1	78392.3	15854.1	34065.4	46342	54639.9	60998.6	65286.3	155881
P50396	sp|P50396|GDIA_MOUSE	Gdi1	1.18727	0.134636	0.447246	15	1.98589e+06	2.71634e+06	2.6659e+06	2.90887e+06	2.38442e+06	2.24305e+06	2.10669e+06	1.86847e+06
P10605	sp|P10605|CATB_MOUSE	Ctsb	1.24858	0.134698	0.447246	3	132230	107805	107768	123060	99027.8	79610.9	128263	76926.9
P06745	sp|P06745|G6PI_MOUSE	Gpi	1.28705	0.135147	0.447246	11	1.42752e+06	1.87601e+06	1.49756e+06	2.20114e+06	1.69795e+06	1.47061e+06	1.23603e+06	1.04234e+06
Q61481	sp|Q61481|PDE1A_MOUSE	Pde1a	0.888908	0.135168	0.447246	4	294615	280230	305319	317541	290359	391235	323309	349062
P03995	sp|P03995|GFAP_MOUSE	Gfap	0.446954	0.137332	0.447246	8	1.90997e+06	1.48795e+06	397562	1.99215e+06	2.35177e+06	1.72085e+06	2.28778e+06	6.0917e+06
Q60973	sp|Q60973|RBBP7_MOUSE	Rbbp7	0.758114	0.138142	0.447246	1	29998.9	26934.2	20833.3	27860.7	34971.7	35478.9	47748.2	23965
Q9QXS6	sp|Q9QXS6|DREB_MOUSE	Dbn1	1.31593	0.138243	0.447246	5	252889	199274	220779	199502	191769	227318	148685	114204
P17742	sp|P17742|PPIA_MOUSE	Ppia	1.28371	0.138339	0.447246	12	2.5815e+06	3.56372e+06	3.50996e+06	3.94433e+06	2.84418e+06	2.76147e+06	3.17346e+06	1.88173e+06
Q8K3H0	sp|Q8K3H0|DP13A_MOUSE	Appl1	1.94419	0.139148	0.447246	1	51032.4	30940.3	21683.8	35138.9	16869.7	11098.1	9865.94	45587.3
Q9Z2V5	sp|Q9Z2V5|HDAC6_MOUSE	Hdac6	3.56613	0.13959	0.447246	1	21503.6	16648.5	20972.4	25180.2	1114.44	20795.5	2503.73	20146.2
Q6PGF7	sp|Q6PGF7|EXOC8_MOUSE	Exoc8	1.90913	0.139995	0.447246	1	46905.9	53582.1	53192.4	47645.4	53402.2	14956.9	47753	12571.2
Q8K394	sp|Q8K394|PLCL2_MOUSE	Plcl2	1.51169	0.140084	0.447246	3	74256	97088.3	133749	89955.8	80881	86407.1	34577.6	68735
Q60625	sp|Q60625|ICAM5_MOUSE	Icam5	1.40479	0.14042	0.447246	3	134255	150241	152435	119904	105138	61159.9	94499.1	155787
O35136	sp|O35136|NCAM2_MOUSE	Ncam2	0.559842	0.141154	0.447246	1	24153.6	29146.4	8422.65	36952.3	37954	42501	29197.3	47358.3
Q9CZ30	sp|Q9CZ30|OLA1_MOUSE	Ola1	1.18558	0.141763	0.447246	2	106078	126876	126343	150001	115487	121950	104084	88068.4
Q3UHX2	sp|Q3UHX2|HAP28_MOUSE	Pdap1	0.402725	0.142138	0.447246	1	42173.9	19017.1	29047.3	45124.1	54875.1	54163.9	38470.9	349502
A2AN08	sp|A2AN08|UBR4_MOUSE	Ubr4	0.725445	0.142465	0.453574	5	280182	191687	245998	199576	241733	385874	447389	228135
P97494	sp|P97494|GSH1_MOUSE	Gclc	3.72715	0.142663	0.454398	1	51379.5	66842	68151.1	54152.8	49638.6	55776.9	2008.45	11811.1
Q99L13	sp|Q99L13|3HIDH_MOUSE	Hibadh	2.32518	0.145571	0.454398	1	83405.1	33891.5	140590	32211.3	24704.8	16957.1	14759.1	70830.8
P0CG50	sp|P0CG50|UBC_MOUSE	Ubc	1.12858	0.145706	0.454398	1	1.31361e+06	1.12242e+06	1.39822e+06	1.31393e+06	1.06352e+06	1.26092e+06	1.23501e+06	1.00818e+06
Q7TQD2	sp|Q7TQD2|TPPP_MOUSE	Tppp	1.21252	0.145823	0.456223	7	1.09516e+06	778600	692734	859912	660366	599227	770977	770270
P42932	sp|P42932|TCPQ_MOUSE	Cct8	0.923479	0.146004	0.456796	12	1.17926e+06	1.13518e+06	1.06161e+06	1.16528e+06	1.18005e+06	1.2646e+06	1.12306e+06	1.35865e+06
Q8CDN6	sp|Q8CDN6|TXNL1_MOUSE	Txnl1	0.791633	0.14612	0.456796	2	155847	133663	91654.8	140901	182719	164185	129132	176821
Q9DB20	sp|Q9DB20|ATPO_MOUSE	Atp5po	0.922489	0.146327	0.456796	5	2.22104e+06	2.43073e+06	2.33499e+06	2.44942e+06	2.62112e+06	2.85198e+06	2.41042e+06	2.3663e+06
P63325	sp|P63325|RS10_MOUSE	Rps10	1.47427	0.146521	0.457064	1	17442.2	28490.1	18247	30078.5	23525.6	15900.8	9626.9	16032.1
Q9QYJ0	sp|Q9QYJ0|DNJA2_MOUSE	Dnaja2	0.650973	0.146741	0.458622	1	9920.43	14373.9	6196.81	9443.07	24459.6	9660.04	13733.8	14319.2
Q9DBE8	sp|Q9DBE8|ALG2_MOUSE	Alg2	2.26804	0.146883	0.459771	1	50272.3	27937.7	31326.9	32637.7	5961.74	16244.2	10162.8	55140.6
Q3UPL5	sp|Q3UPL5|CK096_MOUSE	Ag2	0.696562	0.147177	0.46016	1	35752.8	16262.9	16840.8	31339.9	28357.4	37785	31896.8	38141.1
Q9CZW5	sp|Q9CZW5|TOM70_MOUSE	Tomm70	1.16035	0.147261	0.460205	8	709494	843559	873302	750149	702593	776286	721419	549682
Q924C1	sp|Q924C1|XPO5_MOUSE	Xpo5	1.66228	0.147342	0.460205	1	1281.71	3206.95	4271.29	3731.65	1390.69	1304.59	2170.63	2178.86
P08414	sp|P08414|KCC4_MOUSE	Camk4	1.17816	0.148831	0.465291	3	138834	193497	209583	184207	164483	162927	139492	143998
Q9DBT5	sp|Q9DBT5|AMPD2_MOUSE	Ampd2	0.717587	0.149461	0.465291	2	119441	53030.1	70566.4	66516.3	109574	88464.4	86074.2	134388
Q80U56	sp|Q80U56|AVL9_MOUSE	Avl9	0.827243	0.15026	0.465291	1	21192.8	32097	31442.4	30452.9	35722.6	28756.2	37225.4	36370.4
P63260	sp|P63260|ACTG_MOUSE	Actg1	1.19301	0.15031	0.465291	25	2.6469e+07	3.71693e+07	3.28388e+07	3.68847e+07	3.02788e+07	2.77997e+07	3.09652e+07	2.25699e+07
O08919	sp|O08919|NUMBL_MOUSE	Numbl	1.28201	0.150443	0.465291	1	77561.6	62178.8	54569	46183.7	49268.1	34318.3	55779.9	47708.4
Q91VI7	sp|Q91VI7|RINI_MOUSE	Rnh1	1.23319	0.150606	0.465291	6	205121	196522	194960	211493	170357	113808	184577	200832
Q9JMA1	sp|Q9JMA1|UBP14_MOUSE	Usp14	0.686976	0.150724	0.465291	2	93170.3	66515.9	106190	133126	159957	203737	88287.5	136713
P62259	sp|P62259|1433E_MOUSE	Ywhae	1.32738	0.15098	0.465291	8	707767	1.2816e+06	997451	1.28254e+06	978961	738230	842708	613745
O89029	sp|O89029|MATN4_MOUSE	Matn4	3.77625	0.151224	0.465291	1	95139.4	143916	66081.8	103784	5927.06	202568	39342.7	9776.01
P54823	sp|P54823|DDX6_MOUSE	Ddx6	0.76155	0.151334	0.465291	3	239917	131305	128656	200800	216882	261041	213409	200262
Q3TZZ7	sp|Q3TZZ7|ESYT2_MOUSE	Esyt2	2.38747	0.151597	0.465291	1	63180	29037.5	43237.5	45678.8	36463.7	18634.8	4349.74	37732.3
O70325	sp|O70325|GPX4_MOUSE	Gpx4	0.493181	0.151639	0.465291	1	13509.8	69228.3	85640.9	69104.8	98503.3	93765.5	108353	93489.5
Q8R0S2	sp|Q8R0S2|IQEC1_MOUSE	Iqsec1	0.811293	0.151863	0.468873	6	387725	314373	346620	235257	376376	334261	466808	390668
Q0KL02	sp|Q0KL02|TRIO_MOUSE	Trio	1.40562	0.153857	0.468873	5	231342	174765	195350	176905	152212	76508.5	175726	174905
Q8BKC5	sp|Q8BKC5|IPO5_MOUSE	Ipo5	1.52747	0.156572	0.468873	3	157081	100173	130822	105003	71163.9	48192.2	75796.6	152749
Q8BMJ2	sp|Q8BMJ2|SYLC_MOUSE	Lars	2.29679	0.157184	0.468873	1	47819.1	44382.5	54750.3	47059.2	53371.4	5325.35	38711.5	17859.2
Q3THG9	sp|Q3THG9|AASD1_MOUSE	Aarsd1	0.581924	0.158576	0.468873	1	7981.35	30275	16844.3	15050.6	20704.7	32721.3	42699.1	18466.6
Q03265	sp|Q03265|ATPA_MOUSE	Atp5f1a	0.877666	0.159231	0.468873	31	3.39963e+07	2.69213e+07	2.60987e+07	3.05428e+07	3.1331e+07	3.11398e+07	3.22535e+07	3.90727e+07
P15532	sp|P15532|NDKA_MOUSE	Nme1	1.21291	0.159425	0.468873	3	215854	213850	284357	299493	178876	190689	205644	258948
Q61411	sp|Q61411|RASH_MOUSE	Hras	0.789544	0.159943	0.468873	3	352484	282244	206083	379575	433153	355004	384785	338458
Q8K3C3	sp|Q8K3C3|LZIC_MOUSE	Lzic	0.313897	0.160108	0.468873	1	5582.03	36697.4	1978.57	3833.8	11356.8	17451.7	14121	57187.1
Q63844	sp|Q63844|MK03_MOUSE	Mapk3	0.923031	0.160303	0.468873	6	642624	616528	594652	616155	732024	718298	606346	627257
P70404	sp|P70404|IDHG1_MOUSE	Idh3g	0.806571	0.160599	0.468873	6	633477	627171	449066	717437	779701	745048	582505	893777
P40124	sp|P40124|CAP1_MOUSE	Cap1	1.51757	0.160747	0.468873	6	756082	823143	583491	781483	434365	714583	247554	696354
P35979	sp|P35979|RL12_MOUSE	Rpl12	1.43134	0.160965	0.468873	3	208227	166947	138167	202977	73017.1	159567	110967	179652
Q8BG51	sp|Q8BG51|MIRO1_MOUSE	Rhot1	0.884958	0.161578	0.474218	3	203894	183299	192083	174200	187313	225790	192318	250678
G5E8K5	sp|G5E8K5|ANK3_MOUSE	Ank3	1.33877	0.162938	0.481759	4	163489	141869	117301	132221	128205	136370	99214.1	64558.5
Q6R0H7	sp|Q6R0H7|GNAS1_MOUSE	Gnas	0.791755	0.16298	0.482818	5	394876	407753	424197	411642	482398	434364	428941	796018
Q9CPY7	sp|Q9CPY7|AMPL_MOUSE	Lap3	0.83209	0.162993	0.486263	7	364407	269408	213935	264361	336089	312445	306282	360118
Q6NVG1	sp|Q6NVG1|LPCT4_MOUSE	Lpcat4	1.43077	0.163122	0.486952	1	57406.6	32392.3	41963	30623.5	17459.3	36108.7	25091.3	36047.7
Q9D6J6	sp|Q9D6J6|NDUV2_MOUSE	Ndufv2	2.28263	0.16393	0.486952	2	326474	242844	139238	249602	193864	186817	115944	24170.4
Q3UH93	sp|Q3UH93|PLXD1_MOUSE	Plxnd1	0.483673	0.16516	0.486952	2	77376.8	54200.4	26433.3	43460.8	38464.3	73201.6	122155	255955
Q9JMH9	sp|Q9JMH9|MY18A_MOUSE	Myo18a	0.776281	0.165342	0.486952	7	355601	258890	178314	302601	375685	305639	386267	308418
Q3TPX4	sp|Q3TPX4|EXOC5_MOUSE	Exoc5	1.37004	0.165825	0.486952	2	134295	94857.9	96600.4	91163.9	52412.9	75565.5	65895	122009
Q8R3V5	sp|Q8R3V5|SHLB2_MOUSE	Sh3glb2	1.33194	0.167135	0.486952	6	322517	245364	214550	262546	162166	181258	154647	311573
Q9Z1K5	sp|Q9Z1K5|ARI1_MOUSE	Arih1	1.72595	0.167284	0.486952	1	20675.6	15499.6	31853.6	30089.3	6053.55	17540.2	12909.9	25250.7
P13707	sp|P13707|GPDA_MOUSE	Gpd1	1.29656	0.167366	0.486952	6	306018	390346	369440	392095	401577	274294	294162	188969
Q61151	sp|Q61151|2A5E_MOUSE	Ppp2r5e	1.28584	0.16742	0.487989	3	135149	111710	184820	130326	110982	80181.9	103770	144059
Q8CAY6	sp|Q8CAY6|THIC_MOUSE	Acat2	2.02533	0.167754	0.489365	2	114174	70591.3	60112.7	55431.6	73072.5	11486.5	30937.2	61466.6
A2RT62	sp|A2RT62|FXL16_MOUSE	Fbxl16	0.465647	0.167912	0.489365	4	290345	688963	245703	268183	949637	1.33843e+06	1.0648e+06	207159
Q9Z140	sp|Q9Z140|CPNE6_MOUSE	Cpne6	0.929819	0.168454	0.489365	8	642571	553289	615987	643747	670225	709500	643521	616356
Q8CI71	sp|Q8CI71|VPS50_MOUSE	Vps50	0.548829	0.16981	0.489365	2	194115	94948.1	122717	100204	333302	347825	79592.9	270716
Q2PFD7	sp|Q2PFD7|PSD3_MOUSE	Psd3	0.47254	0.170778	0.490972	1	2929.27	606.808	362.511	1190.36	1706.02	2792.26	1331.19	2425.92
Q2YDW2	sp|Q2YDW2|MSTO1_MOUSE	Msto1	0.411763	0.171884	0.493559	1	102100	28332.6	20735.5	18758.7	31293.5	231601	88537.7	60998.7
Q6A4J8	sp|Q6A4J8|UBP7_MOUSE	Usp7	1.618	0.172382	0.493559	1	39197	20999.1	24381	26728.1	16055.8	16410.9	8677.23	34230.3
B0V2N1	sp|B0V2N1|PTPRS_MOUSE	Ptprs	1.38171	0.172383	0.49418	3	200420	171121	265303	186485	158486	178309	193254	85244.6
Q9Z2H5	sp|Q9Z2H5|E41L1_MOUSE	Epb41l1	1.17843	0.172544	0.495479	4	313304	341102	267938	328700	346009	237748	254697	232937
Q8BXK8	sp|Q8BXK8|AGAP1_MOUSE	Agap1	0.663788	0.172677	0.495479	1	24462	43483.9	33624.5	35120.6	63188.3	27207.5	81668.9	46082.9
Q8CAQ8	sp|Q8CAQ8|MIC60_MOUSE	Immt	0.684035	0.173067	0.495479	3	48043.3	80856.5	82143.9	88818.5	101481	109104	66155.1	176735
Q8C754	sp|Q8C754|VPS52_MOUSE	Vps52	1.28271	0.173084	0.495479	3	243416	144729	189141	154100	103360	175675	146964	142135
Q9CPU0	sp|Q9CPU0|LGUL_MOUSE	Glo1	2.12341	0.173579	0.495479	2	42328.8	201229	121688	224948	43159.4	32389.7	132223	62047.8
P63087	sp|P63087|PP1G_MOUSE	Ppp1cc	1.74657	0.174747	0.495479	2	66956.3	71903.3	62441.5	105066	64629.5	45772.3	15973.2	71829.8
Q9ES28	sp|Q9ES28|ARHG7_MOUSE	Arhgef7	0.782644	0.174786	0.496263	1	33813.9	20695.3	36548.2	37198.2	46148.8	43789.9	38661.2	32455.5
Q9Z0V2	sp|Q9Z0V2|KCND2_MOUSE	Kcnd2	0.304423	0.174802	0.499442	1	152375	13315.1	10930.6	9568.04	20831.6	105152	113974	98963.2
Q80VP9	sp|Q80VP9|ASPH2_MOUSE	Asphd2	2.91477	0.176885	0.50147	1	14923.3	103919	91732.8	64556.9	44804.8	50700	6522.81	8586.93
O08532	sp|O08532|CA2D1_MOUSE	Cacna2d1	0.531839	0.176952	0.502503	1	16744.7	6321.55	3316.06	11140.8	11815.8	20376.7	22320	9095.55
P48774	sp|P48774|GSTM5_MOUSE	Gstm5	1.14154	0.177056	0.502503	5	525577	497088	592642	537403	541646	452177	521593	383572
Q6R891	sp|Q6R891|NEB2_MOUSE	Ppp1r9b	4.06356	0.177082	0.502503	1	27571.1	111389	93319.5	106811	2207.98	14082.7	138265	26114
Q3TDN2	sp|Q3TDN2|FAF2_MOUSE	Faf2	2.21923	0.17726	0.502503	1	62478	34350.2	46500.8	33833.7	30851.4	38311.8	26969.6	4366.87
Q99104	sp|Q99104|MYO5A_MOUSE	Myo5a	0.902235	0.177274	0.502503	16	1.13902e+06	971682	1.15341e+06	949395	1.15093e+06	1.04071e+06	1.189e+06	1.28424e+06
Q9EPL8	sp|Q9EPL8|IPO7_MOUSE	Ipo7	1.42788	0.177798	0.502503	3	145399	100677	116689	108057	61204.5	69313.5	66704.2	156912
Q8BLK3	sp|Q8BLK3|LSAMP_MOUSE	Lsamp	2.45383	0.179053	0.502503	1	3982.78	1676.19	5117.36	6554.01	2936.2	386.682	1448.31	3755.66
Q9Z2U1	sp|Q9Z2U1|PSA5_MOUSE	Psma5	1.80599	0.179954	0.503128	1	29994.3	38864.7	25433.6	38179.5	19494.8	20072.4	6625.26	41043.6
Q8R3D1	sp|Q8R3D1|TBC13_MOUSE	Tbc1d13	0.237235	0.180887	0.504236	1	113453	8720.92	2183.11	31066.5	62826.8	20893.1	148462	108710
P34022	sp|P34022|RANG_MOUSE	Ranbp1	0.7019	0.181244	0.504236	1	102319	46620.9	89071.8	92386	79839.3	118553	164944	103590
P06151	sp|P06151|LDHA_MOUSE	Ldha	1.24581	0.181323	0.504236	12	3.85371e+06	5.19449e+06	6.73046e+06	5.48407e+06	4.69478e+06	4.59685e+06	4.42026e+06	3.21547e+06
Q9QXK3	sp|Q9QXK3|COPG2_MOUSE	Copg2	1.37077	0.1816	0.506496	1	35064.3	28381.7	28012.2	34674.1	33764.6	13929.5	19896.4	29256.7
Q8C419	sp|Q8C419|GP158_MOUSE	Gpr158	1.22066	0.182849	0.506496	5	306698	281533	206612	208419	201166	160375	237544	218535
O35382	sp|O35382|EXOC4_MOUSE	Exoc4	0.657137	0.18339	0.506496	1	8320.35	12929.1	17990.7	12598.9	32015.7	14571.4	24035.9	11661.1
Q99N89	sp|Q99N89|RM43_MOUSE	Mrpl43	0.403325	0.183826	0.506496	1	23500.4	53859.4	78642.9	21366.2	67309.4	194832	25800.1	237543
P08249	sp|P08249|MDHM_MOUSE	Mdh2	0.908141	0.184152	0.506496	16	9.12324e+06	1.02786e+07	8.82298e+06	1.00938e+07	1.10618e+07	1.18482e+07	9.36938e+06	9.9989e+06
Q99MR3	sp|Q99MR3|S12A9_MOUSE	Slc12a9	1.50961	0.185213	0.506496	1	60242.4	22432.9	28772.7	32356.4	13042.7	27484.6	25345.7	26663.1
Q80UJ7	sp|Q80UJ7|RB3GP_MOUSE	Rab3gap1	1.57514	0.185968	0.507188	3	78817.3	57880.8	85601.2	79963.5	68155	20141.5	53616.8	68923.3
P47740	sp|P47740|AL3A2_MOUSE	Aldh3a2	2.11869	0.186712	0.50996	1	3962.38	15893.1	14841	8312.36	4048.25	4048.19	1894.83	12416
P35803	sp|P35803|GPM6B_MOUSE	Gpm6b	1.93981	0.186761	0.511718	2	2.30424e+06	476066	476811	409480	403272	458906	391400	208833
Q3U1J4	sp|Q3U1J4|DDB1_MOUSE	Ddb1	2.05203	0.187343	0.513155	1	69611	52513.7	86432.9	58268.7	31937.6	47599.2	8703.32	78477.7
Q9JJ59	sp|Q9JJ59|ABCB9_MOUSE	Abcb9	1.67873	0.187441	0.513155	1	75261.7	49277.6	51003.4	40449.8	30825.8	58591.6	12920.4	41284.4
P97390	sp|P97390|VPS45_MOUSE	Vps45	1.90464	0.188362	0.513155	2	56656.7	46709	28605.1	57468.4	34080.6	12791.4	11975.3	63322.5
Q8K596	sp|Q8K596|NAC2_MOUSE	Slc8a2	1.14137	0.189265	0.513155	7	354365	385786	293606	421818	335195	342768	308476	281491
Q9R0Q6	sp|Q9R0Q6|ARC1A_MOUSE	Arpc1a	1.08356	0.189933	0.515875	5	731542	649472	682377	682859	725167	581142	632451	602554
P62334	sp|P62334|PRS10_MOUSE	Psmc6	1.3271	0.189972	0.516591	4	328852	274765	251740	326138	217255	141275	228955	340339
Q8BLR2	sp|Q8BLR2|CPNE4_MOUSE	Cpne4	1.32064	0.190158	0.517011	2	86904.4	73981.9	78823.8	75611.3	69626.4	79195.1	34625.2	65979.5
Q3U0V1	sp|Q3U0V1|FUBP2_MOUSE	Khsrp	1.63653	0.190381	0.517121	2	150438	132868	143729	133098	97264.4	113678	32627.7	147770
Q8R404	sp|Q8R404|MIC13_MOUSE	Micos13	1.94638	0.192361	0.519289	1	4398.01	4176.92	1878.39	12167	1723.94	1388.57	3149.15	3880.47
Q8VDP4	sp|Q8VDP4|CCAR2_MOUSE	Ccar2	2.18618	0.193007	0.520595	1	80453.4	50605.6	55030.7	45216.9	43675.7	6250.63	23931.9	67883.6
Q60829	sp|Q60829|PPR1B_MOUSE	Ppp1r1b	1.56464	0.193637	0.521195	3	231415	78561.4	201976	169040	63861.3	137426	86079.3	137099
Q9CZT8	sp|Q9CZT8|RAB3B_MOUSE	Rab3b	1.53401	0.194745	0.521195	1	55116.2	30873.7	41168.4	41868.9	30588.2	15291.1	21192.9	53434.5
P17751	sp|P17751|TPIS_MOUSE	Tpi1	1.12136	0.194775	0.521476	12	3.33232e+06	4.08332e+06	3.10755e+06	3.94301e+06	3.58488e+06	3.04192e+06	3.2704e+06	2.95667e+06
O54988	sp|O54988|SLK_MOUSE	Slk	0.3309	0.19544	0.521476	1	17435.7	8531.39	8793.5	25916.9	99053.3	102025	5107.95	54776.4
P97461	sp|P97461|RS5_MOUSE	Rps5	1.32001	0.195663	0.523228	1	59259.1	29997.3	32145.5	39240.8	25050.3	38013.6	23494.9	33011.2
A6H630	sp|A6H630|ARMT1_MOUSE	Armt1	2.27185	0.196805	0.524788	1	13035.2	2643.81	15104.2	8153.69	2390.77	1391.63	8000.24	5985.7
P05064	sp|P05064|ALDOA_MOUSE	Aldoa	1.16747	0.197356	0.524788	19	7.30494e+06	1.05548e+07	8.69197e+06	1.0322e+07	8.96159e+06	7.82232e+06	8.05876e+06	6.59147e+06
P62309	sp|P62309|RUXG_MOUSE	Snrpg	0.600828	0.197799	0.524788	1	6796.37	18764.3	10966	29258.2	16538.3	22435.1	34545.6	24496
Q9D358	sp|Q9D358|PPAC_MOUSE	Acp1	0.790279	0.198596	0.524788	2	248135	181159	169431	167609	214368	180946	247687	340647
P45377	sp|P45377|ALD2_MOUSE	Akr1b8	0.27656	0.1986	0.524788	1	143403	36733.8	12362.1	5169.41	39283.3	31773.9	185629	248357
Q9QX60	sp|Q9QX60|DGUOK_MOUSE	Dguok	2.19919	0.200108	0.529435	1	2945.96	3528.84	7077.47	6365.99	2131.95	835.15	1316.21	8544.47
P97441	sp|P97441|ZNT3_MOUSE	Slc30a3	2.88371	0.200917	0.530401	1	198913	126897	121724	104233	63765.3	81506.1	5698.4	156373
Q9DCT8	sp|Q9DCT8|CRIP2_MOUSE	Crip2	2.20136	0.201322	0.531321	1	98703.2	90575.2	54086.5	62590.6	42104.1	55915.8	7156.32	76493.4
P09671	sp|P09671|SODM_MOUSE	Sod2	1.1392	0.201898	0.532818	2	124521	131435	123470	158181	139712	103631	123804	105880
O35963	sp|O35963|RB33B_MOUSE	Rab33b	0.356756	0.202173	0.532818	1	16011.4	1856.64	41499.7	7658.12	46580.7	45687.2	15147.1	18092.9
P28184	sp|P28184|MT3_MOUSE	Mt3	2.02508	0.202236	0.533626	1	15086.4	10206.7	7825.84	5020.68	14470.7	4184.21	3225.84	1841.8
Q8BGQ7	sp|Q8BGQ7|SYAC_MOUSE	Aars	1.33189	0.202671	0.533626	8	632677	370597	417647	567407	270917	294754	530560	416760
Q9R1C6	sp|Q9R1C6|DGKE_MOUSE	Dgke	1.62416	0.202804	0.535929	1	33456	77985.3	62448.7	52137	51243.7	50055.5	14955.8	31822.7
Q8K310	sp|Q8K310|MATR3_MOUSE	Matr3	1.30135	0.202811	0.536619	6	413959	383547	255627	374189	336919	250823	182191	343931
Q8K4B0	sp|Q8K4B0|MTA1_MOUSE	Mta1	0.321924	0.203194	0.53701	1	4068.85	37607.1	12982.3	6193.35	59842.5	5067.79	74253.8	50869.6
Q8VCT3	sp|Q8VCT3|AMPB_MOUSE	Rnpep	1.49804	0.203781	0.537565	3	93272.1	81597	102752	94332.2	27731.6	79834.9	66747.9	99122.1
Q9JMK0	sp|Q9JMK0|B4GT5_MOUSE	B4galt5	0.287029	0.204045	0.537565	1	8023.33	2733.27	1170.26	315.807	2505.27	11045.7	2171.19	19874.4
P68040	sp|P68040|RACK1_MOUSE	Rack1	1.16943	0.204138	0.540832	6	537612	525142	427965	477285	475912	512335	344674	366904
Q9CQE8	sp|Q9CQE8|RTRAF_MOUSE	RTRAF	2.85182	0.204272	0.541172	1	27160.6	8543.45	11790.5	17026.5	5289.23	1006.19	4457.73	29686.4
Q9D172	sp|Q9D172|GAL3A_MOUSE	Gatd3a	0.890835	0.204443	0.541172	5	816155	783493	769805	734033	879112	991009	945319	696650
Q9Z1J3	sp|Q9Z1J3|NFS1_MOUSE	Nfs1	0.731315	0.205765	0.541172	2	43982.9	22488.8	21335.7	20090.9	25724.8	31738.6	41990.1	43236.7
Q80WM4	sp|Q80WM4|HPLN4_MOUSE	Hapln4	0.426759	0.206423	0.541172	1	15120.5	52955.8	4351.39	52175.3	54179.5	56142.8	42664.2	42232.8
Q8C5H8	sp|Q8C5H8|NAKD2_MOUSE	Nadk2	0.698592	0.206677	0.541172	1	29660.2	11900.6	23409.8	24955.9	32629.1	26809.3	21862.2	45272.5
Q99PV0	sp|Q99PV0|PRP8_MOUSE	Prpf8	1.51851	0.207325	0.541172	2	21630.9	26462.4	25413.1	43478.1	13291.7	11409.9	22674.7	34591.2
P50580	sp|P50580|PA2G4_MOUSE	Pa2g4	1.80806	0.208177	0.541172	1	64886.5	49086.5	31860	55854.4	43187.8	9070.09	51777.7	26148.6
A6H5Z3	sp|A6H5Z3|EXC6B_MOUSE	Exoc6b	2.12117	0.209044	0.541172	1	29070.7	28947	52217.1	33116.5	36783.2	5433.47	8524.18	42192.5
P28867	sp|P28867|KPCD_MOUSE	Prkcd	1.13959	0.210183	0.541172	4	266312	200172	235219	227006	237537	220659	182687	176261
Q9JM52	sp|Q9JM52|MINK1_MOUSE	Mink1	0.596823	0.210334	0.541172	1	37507.3	18715.9	17817.4	14875.5	38291.2	14216.6	51923.1	51880.9
Q9CQZ5	sp|Q9CQZ5|NDUA6_MOUSE	Ndufa6	2.33008	0.210702	0.541172	1	31345.2	36390.8	34856.7	38432.6	32414.5	13282.7	2896.94	41562.3
Q922Q8	sp|Q922Q8|LRC59_MOUSE	Lrrc59	0.566966	0.210717	0.541172	2	122778	116820	29566	111370	127244	158836	90379.8	250217
Q0KL01	sp|Q0KL01|UBX2B_MOUSE	Ubxn2b	0.498405	0.211529	0.541172	1	7214.31	17875.3	16029.3	22833	36671.8	8273.32	49527.7	50902.3
Q9D0E1	sp|Q9D0E1|HNRPM_MOUSE	Hnrnpm	1.44922	0.212017	0.541172	2	169584	202199	181245	136621	156275	151955	146634	55279.7
P62242	sp|P62242|RS8_MOUSE	Rps8	0.815021	0.212082	0.543872	3	145111	177854	198993	183560	214232	180884	311002	177278
P50114	sp|P50114|S100B_MOUSE	S100b	2.40396	0.212608	0.544683	1	20422.6	20269.5	10352.9	42322.3	28958.4	3433.69	3208.63	17022.5
Q60737	sp|Q60737|CSK21_MOUSE	Csnk2a1	2.16776	0.212987	0.544683	1	79508.6	100990	12372.8	98729.2	35051.6	15612.2	19822.5	40947.9
Q4VAE3	sp|Q4VAE3|TMM65_MOUSE	Tmem65	0.900308	0.214129	0.545593	1	111445	121618	116335	140136	114753	143014	138344	148134
P60710	sp|P60710|ACTB_MOUSE	Actb	1.18764	0.214516	0.547034	2	5.47346e+06	7.40313e+06	8.43164e+06	7.77644e+06	7.05539e+06	5.77272e+06	6.65918e+06	4.92396e+06
Q9D7G0	sp|Q9D7G0|PRPS1_MOUSE	Prps1	0.8374	0.215244	0.548512	2	58631.3	68978.2	66817	66374.9	79246.9	64773.9	109280	65024.4
Q99KK2	sp|Q99KK2|NEUA_MOUSE	Cmas	0.726378	0.215547	0.549695	1	15920.3	23501.8	22896.3	17301.9	32109.1	14830.4	38755.2	28850.4
Q9DBL1	sp|Q9DBL1|ACDSB_MOUSE	Acadsb	0.293929	0.215903	0.549695	1	60869.5	33477.1	8964.82	31291.1	9152.47	164995	307204	165085
Q8VCF0	sp|Q8VCF0|MAVS_MOUSE	Mavs	2.10711	0.215982	0.549695	1	51337.2	23919.8	23330.4	24159.8	5222.12	18629.1	7349.82	49106.8
P24547	sp|P24547|IMDH2_MOUSE	Impdh2	0.470486	0.216462	0.549695	1	16549.8	93660.3	13599.5	96588.2	79741.5	109867	68701.1	69039
Q9WTS4	sp|Q9WTS4|TEN1_MOUSE	Tenm1	2.70309	0.21698	0.550861	1	26209.8	29141.9	140203	110767	13192.2	6452.78	27698.4	94230.8
Q9EPN1	sp|Q9EPN1|NBEA_MOUSE	Nbea	1.20765	0.217038	0.550861	11	626334	397477	606467	578239	396046	471205	564590	389570
Q99JI6	sp|Q99JI6|RAP1B_MOUSE	Rap1b	0.871223	0.217775	0.550861	2	405739	386181	369255	417379	576964	360212	443181	455082
Q8BNW9	sp|Q8BNW9|KBTBB_MOUSE	Kbtbd11	1.10438	0.218433	0.551432	4	408474	310105	374029	320924	319441	312051	345720	296593
O35098	sp|O35098|DPYL4_MOUSE	Dpysl4	1.14283	0.218736	0.55162	8	395149	461646	373963	502762	446421	327366	395539	347825
Q64674	sp|Q64674|SPEE_MOUSE	Srm	1.64046	0.218738	0.553782	2	228484	200004	170458	236324	220061	219501	50451.4	104306
Q60634	sp|Q60634|FLOT2_MOUSE	Flot2	1.2828	0.219692	0.553987	2	62205.6	71392.5	59477.8	63076.5	75646	50828.6	31743.5	50410.7
Q8VCN5	sp|Q8VCN5|CGL_MOUSE	Cth	1.96649	0.220036	0.55459	1	56063.8	23788.6	9735.55	23329.2	30137.8	6341.31	12783.3	8291.16
P51660	sp|P51660|DHB4_MOUSE	Hsd17b4	0.797073	0.220139	0.55459	4	240573	120829	149641	182600	194920	215169	181219	258902
P61164	sp|P61164|ACTZ_MOUSE	Actr1a	1.26512	0.220813	0.55459	7	461874	435393	418799	495910	488024	440133	329163	230593
Q91ZA3	sp|Q91ZA3|PCCA_MOUSE	Pcca	1.55702	0.221266	0.55459	4	285000	169962	204206	234570	204306	182486	187282	56540.2
P63011	sp|P63011|RAB3A_MOUSE	Rab3a	0.877154	0.221821	0.554926	8	2.37481e+06	3.26629e+06	3.0237e+06	3.27906e+06	3.78705e+06	3.48051e+06	3.44411e+06	2.86185e+06
P09411	sp|P09411|PGK1_MOUSE	Pgk1	1.11169	0.222115	0.554926	19	4.7281e+06	6.01382e+06	5.00964e+06	5.74904e+06	5.03681e+06	5.15003e+06	4.10423e+06	5.03621e+06
P62270	sp|P62270|RS18_MOUSE	Rps18	1.38957	0.222523	0.554926	2	73272.3	79595.1	58508.2	97832	53485.8	30169.2	82457.8	67291.8
Q9Z0S1	sp|Q9Z0S1|BPNT1_MOUSE	Bpnt1	0.714845	0.223074	0.556023	2	37802	51737.2	111027	64588.1	66412.7	81204	98976.2	100621
Q99LX0	sp|Q99LX0|PARK7_MOUSE	Park7	1.26216	0.223251	0.556112	5	247609	368157	426269	316998	351456	278555	260233	190516
Q9EQH3	sp|Q9EQH3|VPS35_MOUSE	Vps35	1.12586	0.224527	0.556112	14	1.37682e+06	1.54655e+06	1.72335e+06	1.39177e+06	1.63864e+06	1.29898e+06	1.2033e+06	1.24103e+06
P16546	sp|P16546|SPTN1_MOUSE	Sptan1	0.851691	0.224931	0.556112	28	2.4037e+06	1.78408e+06	1.82793e+06	1.82475e+06	2.15998e+06	2.05563e+06	2.0214e+06	3.02889e+06
P70333	sp|P70333|HNRH2_MOUSE	Hnrnph2	0.566443	0.226199	0.556531	5	1.22196e+06	387731	314183	390355	1.12729e+06	1.2061e+06	366115	1.13389e+06
O54833	sp|O54833|CSK22_MOUSE	Csnk2a2	1.19912	0.226528	0.556531	1	62818.2	77410.1	44187.9	60891	56370	50412.1	53975.7	41258.6
Q8BIW1	sp|Q8BIW1|PRUN1_MOUSE	Prune1	2.52531	0.226571	0.556531	1	32782.9	20012.4	36284.6	32424.5	1554.21	21465.6	22950.9	24787.4
Q8R366	sp|Q8R366|IGSF8_MOUSE	Igsf8	0.805868	0.227028	0.557453	6	539718	455007	312681	510826	627775	616206	406295	591741
P85094	sp|P85094|ISC2A_MOUSE	Isoc2a	1.82732	0.227143	0.557815	2	85715.5	60936.2	99184.8	85120.3	61864.4	17995.3	27621.4	128619
Q6PD28	sp|Q6PD28|2A5B_MOUSE	Ppp2r5b	1.41501	0.227248	0.558389	1	91355.9	47241.8	58444.2	42037.3	41537.2	60910.4	43633.9	23957.8
Q80XK6	sp|Q80XK6|ATG2B_MOUSE	Atg2b	0.666697	0.2274	0.558389	1	10341.9	26572	31304.5	22568.3	30043.5	30048.3	21576.2	50451.3
Q6P1F6	sp|Q6P1F6|2ABA_MOUSE	Ppp2r2a	1.1551	0.227425	0.558636	3	214907	191735	151854	195754	154224	169170	134987	195361
P12960	sp|P12960|CNTN1_MOUSE	Cntn1	0.866675	0.228305	0.558903	16	1.24239e+06	1.13927e+06	827955	1.2481e+06	1.16599e+06	1.41217e+06	1.19381e+06	1.31887e+06
Q99LS3	sp|Q99LS3|SERB_MOUSE	Psph	1.51939	0.228612	0.558903	1	38819.3	24514	32252.6	30528	14082.9	11007.9	38842.8	29196.9
Q08331	sp|Q08331|CALB2_MOUSE	Calb2	0.809612	0.22888	0.561317	4	199169	236160	244379	237652	200424	371379	355765	240102
Q3UH60	sp|Q3UH60|DIP2B_MOUSE	Dip2b	2.13091	0.229378	0.561543	1	26645	24424.3	23854	24507.8	4270.11	24300	4622.13	38473.1
Q8R001	sp|Q8R001|MARE2_MOUSE	Mapre2	2.05493	0.229477	0.561543	1	39537.2	26222.6	44544.8	34879.9	32718.7	8257.62	6164.21	54242
Q9Z0N1	sp|Q9Z0N1|IF2G_MOUSE	Eif2s3x	0.48428	0.229486	0.561543	1	19880	5176.03	1650.87	11483.5	13240.1	12664	13559.5	15599.4
Q9EPW0	sp|Q9EPW0|INP4A_MOUSE	Inpp4a	1.20706	0.230419	0.561543	7	339132	389731	424404	391638	296108	228353	362049	422719
Q80TL4	sp|Q80TL4|PHF24_MOUSE	Phf24	1.13306	0.23051	0.561543	4	275850	263786	233260	255999	264540	208920	184526	258497
Q8BSZ2	sp|Q8BSZ2|AP3S2_MOUSE	Ap3s2	2.21341	0.231016	0.561543	2	598562	125015	111354	163223	125689	162760	22578.2	122680
Q61029	sp|Q61029|LAP2B_MOUSE	Tmpo	0.67332	0.231127	0.561543	1	8304.93	5049.18	9007.4	2968.35	9502.1	10298.5	10117.6	5509.56
Q8CHP8	sp|Q8CHP8|PGP_MOUSE	Pgp	0.803651	0.231192	0.561543	2	159704	86889.2	84896.9	104963	125793	112459	130517	160555
Q69ZA1	sp|Q69ZA1|CDK13_MOUSE	Cdk13	0.689197	0.231804	0.561543	1	181721	57345.2	180225	162660	187693	198775	191697	189321
Q61753	sp|Q61753|SERA_MOUSE	Phgdh	1.07394	0.231863	0.562007	12	2.14986e+06	1.82327e+06	2.0423e+06	1.72751e+06	1.7858e+06	1.73641e+06	1.77059e+06	1.89354e+06
P60469	sp|P60469|LIPA3_MOUSE	Ppfia3	1.12084	0.232508	0.562007	9	584783	494609	474849	395012	435682	428230	399199	461538
Q8CCN5	sp|Q8CCN5|BCAS3_MOUSE	Bcas3	1.35278	0.233941	0.562007	1	57931.9	33986.8	44278.2	54968.7	39619.1	23912.3	56006.4	26968.9
P10126	sp|P10126|EF1A1_MOUSE	Eef1a1	0.889122	0.234045	0.562007	8	2.5891e+06	3.39682e+06	3.51048e+06	3.54163e+06	4.00922e+06	3.46261e+06	3.86852e+06	3.2579e+06
Q61735	sp|Q61735|CD47_MOUSE	Cd47	1.75383	0.234295	0.562007	2	25067.4	65656.6	48014.7	84991.8	39955.1	48248.5	10942.1	33654
Q91Z61	sp|Q91Z61|DIRA1_MOUSE	Diras1	1.47782	0.235144	0.562007	2	166922	174686	80129.1	195596	74127.7	169268	115269	66246.9
Q8JZQ2	sp|Q8JZQ2|AFG32_MOUSE	Afg3l2	0.575367	0.235787	0.562358	7	311170	1.51248e+06	1.66646e+06	1.4461e+06	2.16233e+06	1.56786e+06	2.25727e+06	1.35234e+06
P35486	sp|P35486|ODPA_MOUSE	Pdha1	1.06525	0.236503	0.562358	9	1.76603e+06	1.84908e+06	2.07797e+06	1.91704e+06	1.87017e+06	1.75444e+06	1.88647e+06	1.63212e+06
Q9R1P0	sp|Q9R1P0|PSA4_MOUSE	Psma4	1.14829	0.236516	0.562358	1	100770	86566.7	111831	103920	74808.6	111141	90566.3	77436.8
P84084	sp|P84084|ARF5_MOUSE	Arf5	0.809749	0.23676	0.562358	1	60404.1	60051.2	55979.2	59930.8	97463.4	76794.7	81642.1	46320.8
Q5IRJ6	sp|Q5IRJ6|ZNT9_MOUSE	Slc30a9	0.592478	0.237236	0.562358	1	90696.4	100052	40157.6	43570.8	122515	178540	139916	42101.1
P59325	sp|P59325|IF5_MOUSE	Eif5	1.8311	0.237468	0.562471	1	47138.3	9348.53	14931.5	37995	19289.7	5887.76	15103.6	12964.2
Q9ESJ4	sp|Q9ESJ4|SPN90_MOUSE	Nckipsd	1.2225	0.237783	0.562471	7	645689	352799	404052	363487	346076	317826	417376	326285
Q9CVB6	sp|Q9CVB6|ARPC2_MOUSE	Arpc2	1.17411	0.239859	0.563277	5	372086	507316	462072	497163	443496	429823	415302	288239
Q14CH7	sp|Q14CH7|SYAM_MOUSE	Aars2	2.50784	0.24099	0.565323	1	71643.2	74228.4	75882.4	98558.5	63777.7	4259.41	103369	35807.7
Q9Z1W9	sp|Q9Z1W9|STK39_MOUSE	Stk39	1.19904	0.242039	0.565323	2	87181.4	62256.4	71180.4	61205.5	72905.3	66939.1	44205.3	53027.8
Q60714	sp|Q60714|S27A1_MOUSE	Slc27a1	1.28168	0.243156	0.565323	1	58473.4	29350.6	40092.4	29490.3	26894.1	28881.9	24685.6	39216.7
P48962	sp|P48962|ADT1_MOUSE	Slc25a4	0.849244	0.243407	0.566612	10	5.08197e+06	7.49754e+06	7.36893e+06	7.7372e+06	9.37929e+06	8.16808e+06	8.4373e+06	6.46122e+06
P62835	sp|P62835|RAP1A_MOUSE	Rap1a	0.877431	0.243458	0.567401	2	397821	375650	364839	406597	560040	347505	427707	449325
Q8C1A5	sp|Q8C1A5|THOP1_MOUSE	Thop1	0.816006	0.243461	0.567467	4	120724	82199.3	102525	76255.8	114306	87185.1	113519	154673
Q61036	sp|Q61036|PAK3_MOUSE	Pak3	2.63114	0.244532	0.567467	1	26913.9	67953.7	33118.3	56603.9	69180.3	3917.5	5897.64	44757.1
Q811I0	sp|Q811I0|ATPF1_MOUSE	Atpaf1	0.414229	0.244848	0.567467	1	38224.1	45773.3	2907.32	37235.5	51938.7	37918.5	38986.1	83788.6
Q3UUG6	sp|Q3UUG6|TBC24_MOUSE	Tbc1d24	1.66435	0.244999	0.567651	1	43260.3	42602.4	63702.9	53460.2	35035	46297.3	51623.2	9768.6
P67984	sp|P67984|RL22_MOUSE	Rpl22	0.64942	0.245025	0.567651	1	23683.2	91873.8	69995.7	73266.6	81994.1	62172.3	103104	119358
Q9QUI0	sp|Q9QUI0|RHOA_MOUSE	Rhoa	0.793622	0.245399	0.567651	4	212002	364464	220543	416472	402902	383453	363270	318773
P17156	sp|P17156|HSP72_MOUSE	Hspa2	0.89943	0.245606	0.571849	3	307303	240177	214945	256545	255634	294156	278529	296931
Q925N0	sp|Q925N0|SFXN5_MOUSE	Sfxn5	0.795224	0.24574	0.573787	3	219146	227486	323508	300242	349282	367794	434346	217004
P62754	sp|P62754|RS6_MOUSE	Rps6	1.09422	0.245999	0.575521	3	196050	160928	173635	172503	172465	152369	179192	139987
P84078	sp|P84078|ARF1_MOUSE	Arf1	0.83584	0.246348	0.57556	1	174379	227371	208036	296761	307447	285918	273763	208399
Q78IK2	sp|Q78IK2|USMG5_MOUSE	Atp5md	2.17499	0.246659	0.57556	1	44892.3	45557.2	56463.3	73868.7	78710	60419.1	7889.68	10159.2
Q9ESW4	sp|Q9ESW4|AGK_MOUSE	Agk	0.648791	0.247099	0.57556	1	10921.5	10192.5	23380.4	19018.4	12835	30257.6	17145	41956.6
P14206	sp|P14206|RSSA_MOUSE	Rpsa	0.845163	0.247266	0.57556	4	244403	160160	221354	180124	186317	265203	275708	224531
P80318	sp|P80318|TCPG_MOUSE	Cct3	1.10729	0.247491	0.57556	13	1.84678e+06	1.44936e+06	1.82645e+06	1.69928e+06	1.56302e+06	1.68559e+06	1.30198e+06	1.611e+06
O08759	sp|O08759|UBE3A_MOUSE	Ube3a	1.49708	0.247965	0.57556	1	40699.6	22655.3	28937.9	22094.1	37567.7	18883.6	17441.2	9485.33
Q80TK0	sp|Q80TK0|K1107_MOUSE	Kiaa1107	2.33527	0.248738	0.57556	1	28922.2	8583.12	12849.7	13590.1	7463.72	1050.16	11007.8	16894
Q8K4X7	sp|Q8K4X7|PLCD_MOUSE	Agpat4	1.62121	0.249672	0.57556	1	57295.2	33344.8	45735.5	34531.6	30683.2	34290.8	45736.1	9076.62
P28658	sp|P28658|ATX10_MOUSE	Atxn10	1.35897	0.249693	0.57556	2	28741.2	31266.8	18341.8	31988.7	23107.7	15730.9	13101.9	32459.3
Q6ZQ18	sp|Q6ZQ18|EFR3B_MOUSE	Efr3b	1.04223	0.249694	0.57556	4	143596	158170	140288	154567	141779	140621	140077	149461
P62908	sp|P62908|RS3_MOUSE	Rps3	1.09012	0.250609	0.57556	4	370062	387927	312633	380720	334890	346785	290365	358813
Q6NZL0	sp|Q6NZL0|SOGA3_MOUSE	Soga3	0.720968	0.250695	0.57556	3	157680	147773	81025	59281	109182	141043	152911	175914
P12970	sp|P12970|RL7A_MOUSE	Rpl7a	1.59656	0.250785	0.57556	4	254146	276502	276888	271323	268640	252890	211094	56657.5
Q9CY64	sp|Q9CY64|BIEA_MOUSE	Blvra	0.620528	0.251131	0.57556	1	11268.7	40678.2	48558.1	45914.7	59341.4	45305.3	36725.3	69812.3
Q02819	sp|Q02819|NUCB1_MOUSE	Nucb1	0.47132	0.252284	0.57556	1	17650	22867.1	13498.5	5283.09	12060.2	49836.4	83506.9	11620.9
P57776	sp|P57776|EF1D_MOUSE	Eef1d	0.547902	0.252427	0.57556	1	19158.6	7436.41	35016.1	18536.3	49609.1	55241.6	31724.2	11802.9
Q922R8	sp|Q922R8|PDIA6_MOUSE	Pdia6	1.39034	0.253029	0.57556	2	191225	98769.1	147600	111004	63889.8	85760.7	86283.1	175172
Q91XU3	sp|Q91XU3|PI42C_MOUSE	Pip4k2c	2.17361	0.254104	0.575919	1	56132.2	42895.8	39515.9	58320.6	43359.3	35652.4	44364.6	3624.85
Q6RHR9	sp|Q6RHR9|MAGI1_MOUSE	Magi1	0.289196	0.254176	0.576956	1	55303.7	4413.06	9528.1	5040.82	3578.63	49051	74964.1	127354
Q9JLB0	sp|Q9JLB0|MPP6_MOUSE	Mpp6	0.749211	0.254348	0.576956	5	236493	278169	313780	316094	359215	476942	574316	210465
P39087	sp|P39087|GRIK2_MOUSE	Grik2	0.598914	0.255285	0.576956	1	720.504	439.148	1225.8	1250.87	1000.14	684.903	1894.79	2905.16
Q9DCR2	sp|Q9DCR2|AP3S1_MOUSE	Ap3s1	0.811986	0.255395	0.576956	1	18690.9	33654.8	31644.2	26596.3	26315.9	40431.2	30150.5	37963.9
P12023	sp|P12023|A4_MOUSE	App	0.445825	0.255804	0.577255	2	87660.7	68659.1	27166.9	13923.3	73528.9	29229.3	305607	87738.2
Q9ESN6	sp|Q9ESN6|TRIM2_MOUSE	Trim2	0.830843	0.255948	0.577255	3	90800.5	96221.8	98277	63621.2	102815	97355.2	82840.8	138255
Q8CGK7	sp|Q8CGK7|GNAL_MOUSE	Gnal	1.35368	0.257169	0.577255	3	296875	211918	219837	121030	121761	147753	119782	231334
Q6GQS1	sp|Q6GQS1|SCMC3_MOUSE	Slc25a23	1.11864	0.257765	0.577313	1	95909.5	74327.3	86045.9	89718	65251.8	90777.3	72588.7	81736.9
Q9DBG6	sp|Q9DBG6|RPN2_MOUSE	Rpn2	1.38327	0.257841	0.578813	2	61456.2	44060.3	46455.6	59555.4	27590.9	46176.6	23430.8	68543.5
Q61831	sp|Q61831|MK10_MOUSE	Mapk10	0.499503	0.258034	0.578813	1	60737.7	79507.5	75970.3	8342.87	71360.6	119494	85060.4	67785.9
Q8BG39	sp|Q8BG39|SV2B_MOUSE	Sv2b	1.313	0.258328	0.579456	6	281854	625698	626092	645713	467888	428756	370559	322696
P84086	sp|P84086|CPLX2_MOUSE	Cplx2	1.35977	0.258718	0.580262	3	81175.1	72407.1	168020	136895	92730.8	62968.3	108711	62297.9
P97447	sp|P97447|FHL1_MOUSE	Fhl1	0.393631	0.258873	0.580262	1	22450.1	1222.5	27886.1	21308.4	34378.5	29894	27988.8	23615.3
Q9D3D9	sp|Q9D3D9|ATPD_MOUSE	Atp5f1d	0.63527	0.259283	0.580262	1	27269.1	13906.4	10753.3	11839.1	34796.2	10476.7	38527.6	21105
P55096	sp|P55096|ABCD3_MOUSE	Abcd3	0.490642	0.259656	0.580967	1	32677.1	4078.32	37068.3	12361.2	15059.5	37072.6	42601.3	44303.9
Q8BP47	sp|Q8BP47|SYNC_MOUSE	Nars	0.771642	0.262329	0.580967	6	244081	484438	483211	241345	493588	418768	495504	379750
Q9D7B6	sp|Q9D7B6|ACAD8_MOUSE	Acad8	0.854297	0.263285	0.580967	1	33158.5	36255.9	36066.9	27229.5	49235.4	42447.2	29810.3	35579
Q8BXA0	sp|Q8BXA0|LRFN5_MOUSE	Lrfn5	2.00271	0.263364	0.580967	1	24226.2	50917.9	25631.6	51556.4	4708.37	13518.8	30831.4	51634.1
Q91ZZ3	sp|Q91ZZ3|SYUB_MOUSE	Sncb	0.579944	0.263672	0.582465	2	39466.7	96776.3	13386.7	40686	110759	57736.2	51805.4	55509.7
P62196	sp|P62196|PRS8_MOUSE	Psmc5	0.84617	0.264799	0.582465	2	149101	97251	95530.8	105513	122666	122196	113216	167999
Q3ULJ0	sp|Q3ULJ0|GPD1L_MOUSE	Gpd1l	1.21311	0.264958	0.582465	6	793992	648083	572495	436466	528981	555777	371721	543256
Q7M6Y3	sp|Q7M6Y3|PICAL_MOUSE	Picalm	1.83497	0.265633	0.582465	2	65793.9	44680	55434.4	38736.4	47550	11729.7	12542.9	79587.9
Q6ZPJ3	sp|Q6ZPJ3|UBE2O_MOUSE	Ube2o	0.738886	0.267593	0.582465	5	116671	190901	152058	151300	186121	146820	395027	159259
P40142	sp|P40142|TKT_MOUSE	Tkt	0.926007	0.267829	0.582465	17	1.56102e+06	1.38943e+06	1.39058e+06	1.54721e+06	1.82595e+06	1.61624e+06	1.52003e+06	1.41476e+06
O88844	sp|O88844|IDHC_MOUSE	Idh1	1.14424	0.269771	0.582465	2	64822.3	94973.5	79041.3	88304.8	67547.7	79099.4	79934.2	58691.9
Q99MR6	sp|Q99MR6|SRRT_MOUSE	Srrt	0.434016	0.269875	0.582658	1	104264	33870	19769.8	20156.6	241439	38012.8	24263.3	178099
B9EKR1	sp|B9EKR1|PTPRZ_MOUSE	Ptprz1	0.562806	0.270043	0.582769	2	51599	29823.3	22683.3	57399.3	98893.7	119183	19345.7	87581.3
Q8R0A7	sp|Q8R0A7|K0513_MOUSE	Kiaa0513	1.37514	0.270661	0.588036	2	97932.5	51541.9	41218.4	36081	57422.6	30892.4	32553.7	36352.5
Q91VW3	sp|Q91VW3|SH3L3_MOUSE	Sh3bgrl3	0.672787	0.271632	0.588846	3	69046.2	90495.3	81397.7	62779.1	73527.6	58591.5	162802	222196
Q91XM9	sp|Q91XM9|DLG2_MOUSE	Dlg2	0.67913	0.272506	0.588846	2	54654.6	68120.3	86119.7	58026.3	164397	47755.1	71075.9	156741
Q64514	sp|Q64514|TPP2_MOUSE	Tpp2	1.15977	0.273009	0.588846	6	402938	275009	385785	349069	354145	236228	298816	329945
Q921H8	sp|Q921H8|THIKA_MOUSE	Acaa1a	1.12085	0.273897	0.590254	3	129532	96271	99643.8	102073	84529.8	101746	110150	84827.4
P42125	sp|P42125|ECI1_MOUSE	Eci1	0.861699	0.273981	0.590254	4	296471	300092	340706	235668	308249	301808	308737	451099
P59644	sp|P59644|PI5PA_MOUSE	Inpp5j	2.85564	0.274879	0.591026	1	67314.1	54044.2	43712.9	25560.6	1500.31	14562.7	39557.3	70724.8
Q61249	sp|Q61249|IGBP1_MOUSE	Igbp1	0.461887	0.27507	0.594441	1	21788.9	15292.5	39715.8	2057.05	30091.2	24724.9	26892.5	29893.3
Q91Z53	sp|Q91Z53|GRHPR_MOUSE	Grhpr	0.828976	0.275157	0.594441	5	423738	271649	339688	264275	476428	305379	452722	332204
A2AMZ4	sp|A2AMZ4|NDUF8_MOUSE	Ndufaf8	0.494396	0.275463	0.597147	1	6531.1	830.276	3767.21	8428.17	5473.59	7498.29	15666.4	4481.87
Q5HZI9	sp|Q5HZI9|S2551_MOUSE	Slc25a51	2.34278	0.275476	0.597147	1	7764.92	5683.87	7968.37	7689.66	8597.61	658.597	1331.02	11911.1
Q9JMG7	sp|Q9JMG7|HDGR3_MOUSE	Hdgfl3	0.504955	0.275734	0.597147	1	12515.7	6966.78	8774.24	5953.88	4250.13	13972.7	60556.6	19482.5
Q6P1B1	sp|Q6P1B1|XPP1_MOUSE	Xpnpep1	1.10972	0.275842	0.597779	5	194130	244942	219273	194931	194576	195701	159625	220486
Q8CBW3	sp|Q8CBW3|ABI1_MOUSE	Abi1	0.816344	0.276743	0.599189	1	85647.5	51859.6	70589.4	55001.8	76481.6	67011.5	113070	67005.7
Q91YE8	sp|Q91YE8|SYNP2_MOUSE	Synpo2	0.544138	0.277509	0.60038	1	14960.9	26951	20487.1	9502.18	11920.4	22574.2	105583	31513.7
Q9CWS0	sp|Q9CWS0|DDAH1_MOUSE	Ddah1	1.07847	0.277705	0.600382	7	486948	435233	519111	508832	464651	508234	402253	435625
Q9R190	sp|Q9R190|MTA2_MOUSE	Mta2	1.67034	0.277847	0.600382	1	73451.4	23025.4	24368.9	72353	16598.7	14863.1	49336.1	31472.8
P62849	sp|P62849|RS24_MOUSE	Rps24	2.11297	0.278122	0.600382	1	6778.47	52213.3	55908.4	9084.94	12548.2	6828.07	5538.56	19004.7
Q9WTX6	sp|Q9WTX6|CUL1_MOUSE	Cul1	1.39243	0.279137	0.600382	2	52438.3	33596	52263.7	80964.3	42216.4	26804.8	26895.8	65156.7
P61148	sp|P61148|FGF1_MOUSE	Fgf1	0.748723	0.27922	0.600382	1	3132.34	3009.37	2616.54	2477.99	3781.56	6872.99	2170.51	3447.53
P45376	sp|P45376|ALDR_MOUSE	Akr1b1	0.928416	0.279283	0.600382	3	247607	208262	197296	202932	210285	223386	240190	246292
P62274	sp|P62274|RS29_MOUSE	Rps29	1.97509	0.279962	0.600382	1	46888.3	37822.3	32225.8	29831.1	24741.6	34773.3	3441.31	37839.4
Q9R0N7	sp|Q9R0N7|SYT7_MOUSE	Syt7	2.51085	0.282668	0.600382	1	63275.1	39681	36645.6	47610.3	43024.6	4705.46	5263.31	103438
Q91Z69	sp|Q91Z69|SRGP1_MOUSE	Srgap1	1.69388	0.283824	0.600382	1	6586.2	1183.07	5855.26	4165.73	3400.31	1392.08	1678.99	2904.85
Q8BGD5	sp|Q8BGD5|CPT1C_MOUSE	Cpt1c	0.843785	0.284275	0.600382	2	41932.8	31507	57930.7	49966	49251.3	45588.5	59467.8	56501.8
Q9EQ06	sp|Q9EQ06|DHB11_MOUSE	Hsd17b11	0.76957	0.284445	0.601616	1	90113.5	58006.6	49731.2	67770.6	67966.7	98643.4	57639.9	129975
O35405	sp|O35405|PLD3_MOUSE	Pld3	1.63948	0.284655	0.601706	1	82603.7	46250.3	45430.2	51967	43761.1	45100.1	10380	60940.1
P62823	sp|P62823|RAB3C_MOUSE	Rab3c	0.77634	0.284797	0.601706	3	198734	188580	105185	281239	203580	213492	262688	267322
P51410	sp|P51410|RL9_MOUSE	Rpl9	0.894105	0.284825	0.601706	1	65912.4	56622.3	68605.2	68458.9	61760.7	81598.3	85572.9	63600.1
Q8CHG7	sp|Q8CHG7|RPGF2_MOUSE	Rapgef2	1.2775	0.286184	0.601706	5	472786	348831	249094	334177	191782	263737	243723	418118
Q01063	sp|Q01063|PDE4D_MOUSE	Pde4d	2.201	0.286188	0.602048	1	122325	28819.4	25880	4655.8	12041.5	11584.4	9284.34	13975.6
P28741	sp|P28741|KIF3A_MOUSE	Kif3a	0.833433	0.287035	0.602048	1	51525.7	63693.8	57643.4	57754.1	45458.4	72909.2	73598.1	92834.3
O54983	sp|O54983|CRYM_MOUSE	Crym	1.10145	0.28737	0.602048	9	793435	1.06862e+06	983061	1.05769e+06	953555	794863	835147	946282
Q99LY9	sp|Q99LY9|NDUS5_MOUSE	Ndufs5	1.23402	0.287544	0.60279	1	36887.1	28234.4	28441.1	30211.6	23656	18533.3	21769	40433.9
P56695	sp|P56695|WFS1_MOUSE	Wfs1	1.77836	0.288851	0.607888	1	47365.1	34686.9	29524.4	37665.4	5563.43	28262.3	20658.5	56237.3
Q9JJW6	sp|Q9JJW6|ALRF2_MOUSE	Alyref2	2.57646	0.288883	0.608167	1	13195.8	3729.36	11159.1	6264.13	774.515	1392.08	2877.96	25158.6
Q8VCK3	sp|Q8VCK3|TBG2_MOUSE	Tubg2	0.875881	0.289066	0.608167	1	60485.4	45068.2	55855.2	66927.7	70719.6	51225.2	68641.2	69631.1
Q8R574	sp|Q8R574|KPRB_MOUSE	Prpsap2	1.17475	0.289692	0.608167	3	206454	157811	157916	130023	150227	151553	152593	101107
Q8BW96	sp|Q8BW96|KCC1D_MOUSE	Camk1d	0.374089	0.289813	0.608167	2	200855	4641.77	59372.6	88890.9	94930.3	86044.5	124412	247240
P58404	sp|P58404|STRN4_MOUSE	Strn4	1.14966	0.289951	0.608167	1	55207.3	37395.6	48880.3	38986.7	33923.4	48162	38206.5	36079
P16332	sp|P16332|MUTA_MOUSE	Mmut	1.4249	0.290118	0.608167	3	206786	128273	82021.9	149374	52312.4	91338.6	98956.3	166733
Q3V1U8	sp|Q3V1U8|ELMD1_MOUSE	Elmod1	1.33017	0.291014	0.60963	1	46309	59345.5	41987.3	49904.2	47703.9	36471.1	19093.8	55370.3
Q923S9	sp|Q923S9|RAB30_MOUSE	Rab30	0.542696	0.291358	0.60963	1	40862.7	4431.5	21903.3	25054.4	21952.2	32258.9	26929.3	60074.9
P59016	sp|P59016|VP33B_MOUSE	Vps33b	1.50165	0.291508	0.610354	1	9022.8	25076.7	38103.6	34075.6	14216	21756.5	11917.4	15674.6
P27659	sp|P27659|RL3_MOUSE	Rpl3	1.78181	0.291704	0.610354	1	36631	50396.3	46710.3	47710.9	74928.3	45549.9	10371.9	11530.2
P62082	sp|P62082|RS7_MOUSE	Rps7	1.29219	0.293119	0.610354	1	23406.2	11755.1	21612	12986.6	13750.6	10374.8	10466.7	18549
P57784	sp|P57784|RU2A_MOUSE	Snrpa1	0.443856	0.29466	0.610775	1	10578.7	9880.48	7329.35	562.055	12845.6	10607.9	8454.12	9630.12
O09061	sp|O09061|PSB1_MOUSE	Psmb1	1.08933	0.294927	0.610775	2	77377.9	100716	95213	104507	81744.7	90532.2	81135.8	91715.4
P30275	sp|P30275|KCRU_MOUSE	Ckmt1	0.937732	0.295204	0.610775	10	2.71587e+06	2.28062e+06	2.5456e+06	2.79603e+06	2.78171e+06	2.59031e+06	2.6353e+06	3.00252e+06
P46664	sp|P46664|PURA2_MOUSE	Adss	1.1322	0.296441	0.610775	4	484001	318841	326243	317976	287682	317676	341020	312600
Q921G7	sp|Q921G7|ETFD_MOUSE	Etfdh	1.24616	0.296983	0.610775	4	148875	161215	153923	134130	135680	136279	68867.4	161363
Q8R3S6	sp|Q8R3S6|EXOC1_MOUSE	Exoc1	1.7882	0.297128	0.610775	2	59382.6	53543.6	78401.2	59425.3	42170.6	7949.58	62824.4	68788.4
Q8R0F6	sp|Q8R0F6|ILKAP_MOUSE	Ilkap	0.666607	0.298499	0.610775	1	37762.8	7899.68	18705.4	17830.7	21764.3	27165.7	41214.5	20678.1
Q9Z2I9	sp|Q9Z2I9|SUCB1_MOUSE	Sucla2	1.05247	0.298969	0.611254	12	2.22933e+06	2.50826e+06	2.58656e+06	2.3881e+06	2.46389e+06	2.14476e+06	2.38282e+06	2.23558e+06
Q9CR95	sp|Q9CR95|NECP1_MOUSE	Necap1	0.797184	0.299343	0.611254	2	129637	139891	189250	203081	204180	160962	325948	161103
Q8VI51	sp|Q8VI51|SORC3_MOUSE	Sorcs3	2.16999	0.299592	0.611254	1	130202	9576.62	18222	100800	9615.13	16873	29898	21294.2
Q8VDM4	sp|Q8VDM4|PSMD2_MOUSE	Psmd2	1.09745	0.299679	0.611254	4	151447	176596	197612	192256	167325	183936	162099	140405
B2RSH2	sp|B2RSH2|GNAI1_MOUSE	Gnai1	1.4721	0.299803	0.613506	5	1.12211e+06	1.41247e+06	581937	1.12364e+06	1.2332e+06	391476	460264	993166
Q8R5C5	sp|Q8R5C5|ACTY_MOUSE	Actr1b	1.12356	0.300147	0.615721	6	499864	493918	424903	583456	396236	376132	505961	509340
P63330	sp|P63330|PP2AA_MOUSE	Ppp2ca	1.10361	0.301898	0.615721	6	637977	634742	619358	596898	604647	588992	646321	438450
P97315	sp|P97315|CSRP1_MOUSE	Csrp1	1.03813	0.301923	0.615721	6	329540	348787	329040	345369	321623	333096	347294	302259
Q8VD65	sp|Q8VD65|PI3R4_MOUSE	Pik3r4	1.24831	0.301992	0.617585	2	96398.6	47586.4	57334.7	63682	37998.9	49372.3	51940.1	70785.4
Q6PHZ2	sp|Q6PHZ2|KCC2D_MOUSE	Camk2d	1.13225	0.302459	0.617587	3	1.03751e+06	830840	1.08067e+06	859037	761115	863836	703181	1.05318e+06
P49312	sp|P49312|ROA1_MOUSE	Hnrnpa1	0.560364	0.302699	0.617587	1	9170.43	55710.6	62973.4	72854.8	75119.3	87697.7	83860	43029.6
P00493	sp|P00493|HPRT_MOUSE	Hprt1	1.28498	0.302818	0.618205	2	119719	176003	173802	214047	93273.1	145508	210020	100869
Q3ULD5	sp|Q3ULD5|MCCB_MOUSE	Mccc2	0.313808	0.303379	0.618205	1	18369	14964.5	375.502	2259.11	16973.8	10848.3	3646.58	35810.8
Q9Z218	sp|Q9Z218|DPP6_MOUSE	Dpp6	1.09097	0.303696	0.618205	5	325091	318173	263646	333856	286778	329938	260287	260959
P46638	sp|P46638|RB11B_MOUSE	Rab11b	0.822267	0.304256	0.618205	3	185863	171844	108654	156252	181803	130913	212537	234492
Q9R0P5	sp|Q9R0P5|DEST_MOUSE	Dstn	0.903632	0.304597	0.618205	2	213907	238444	272177	249772	297765	300459	267152	217583
A2ALS5	sp|A2ALS5|RPGP1_MOUSE	Rap1gap	1.35335	0.30473	0.618205	2	148732	64055.5	92572.3	85888	55135.7	55802.7	57502.1	127632
Q64442	sp|Q64442|DHSO_MOUSE	Sord	1.91117	0.304902	0.618205	1	37107.3	38447.4	57320.5	47151.8	33524	52421.9	4310.65	38153
P47199	sp|P47199|QOR_MOUSE	Cryz	0.758828	0.305095	0.618205	2	30239.4	55505.4	53456.9	43322.8	102084	39260.9	58696.5	49834
Q9CQ62	sp|Q9CQ62|DECR_MOUSE	Decr1	1.74216	0.30512	0.618205	1	38417	37681.4	42011.6	50390.7	34956.7	38626	44387.3	5550.67
Q99MU3	sp|Q99MU3|DSRAD_MOUSE	Adar	0.70682	0.305264	0.618205	1	11601.1	17357.7	7850.82	13528.7	12383.7	26287.5	9723.55	27071
P31324	sp|P31324|KAP3_MOUSE	Prkar2b	1.25494	0.305723	0.618205	6	223903	209655	201172	185950	181266	189973	91275.6	225253
Q9JJ28	sp|Q9JJ28|FLII_MOUSE	Flii	1.56863	0.305755	0.618205	2	94382.8	47138.8	22436	34065.3	23380.6	39726.1	43492.7	13902.8
Q9JKC6	sp|Q9JKC6|CEND_MOUSE	Cend1	0.477913	0.306012	0.618205	1	25398.5	34654.3	42833.4	6181.3	114178	22307.2	101735	17239.8
P62315	sp|P62315|SMD1_MOUSE	Snrpd1	2.24084	0.308016	0.618205	1	21636.4	5326.29	11308.4	8229.48	1967.4	1389.54	5921.89	26273.4
P62245	sp|P62245|RS15A_MOUSE	Rps15a	0.905589	0.310661	0.618205	1	112608	83538.5	86448.5	80143.1	112103	94046.2	91050.9	100952
Q9JLV5	sp|Q9JLV5|CUL3_MOUSE	Cul3	1.23792	0.310753	0.618205	4	161706	262774	161910	223445	200907	117344	130601	212606
P61027	sp|P61027|RAB10_MOUSE	Rab10	1.47051	0.312407	0.618205	1	527002	304459	319775	358279	286642	149917	152983	598007
Q99KK7	sp|Q99KK7|DPP3_MOUSE	Dpp3	0.835535	0.312461	0.618205	3	103293	124081	135370	100342	130295	92891.9	169584	174034
O88342	sp|O88342|WDR1_MOUSE	Wdr1	0.92858	0.313095	0.618205	14	1.49722e+06	1.62571e+06	1.34422e+06	1.653e+06	1.88188e+06	1.5034e+06	1.59961e+06	1.60737e+06
Q9CR16	sp|Q9CR16|PPID_MOUSE	Ppid	0.885297	0.313783	0.618205	3	226626	174141	237935	201839	229061	213989	303139	207650
O55022	sp|O55022|PGRC1_MOUSE	Pgrmc1	0.611493	0.314625	0.618205	2	77717.2	13390.9	38203	37133	28104.6	88055.2	51414.3	82985.9
Q00558	sp|Q00558|F8I2_MOUSE	F8a1	1.43398	0.315413	0.618205	1	42977.7	164026	130678	141351	91000.8	87300.7	71484.2	54226.5
P45878	sp|P45878|FKBP2_MOUSE	Fkbp2	0.667527	0.317672	0.618205	1	27394.4	58598.1	60309.4	78424.6	113787	80737.7	122386	34010.1
P22315	sp|P22315|HEMH_MOUSE	Fech	0.888039	0.318323	0.618205	3	154160	159866	166816	162210	203952	132872	184069	214970
Q62523	sp|Q62523|ZYX_MOUSE	Zyx	0.576222	0.318932	0.618205	1	4550.21	9748.15	3232.5	1550.26	5033.98	4527.82	18218.8	4855.35
Q9WUR9	sp|Q9WUR9|KAD4_MOUSE	Ak4	1.14472	0.319323	0.621557	3	152335	135563	115041	132456	155821	104700	93337.1	120348
Q8R5J9	sp|Q8R5J9|PRAF3_MOUSE	Arl6ip5	1.67224	0.321014	0.625677	1	64555.9	70072.6	63393.4	76114.3	61148.5	69438.6	66435.9	9894.84
P30999	sp|P30999|CTND1_MOUSE	Ctnnd1	1.35881	0.321741	0.625677	2	73505.7	42917	43005.9	44202.5	49514.3	18002.1	35992.9	54830.2
B9EJA2	sp|B9EJA2|CTTB2_MOUSE	Cttnbp2	1.4324	0.321827	0.627711	1	32332.4	17261.5	14912.6	14435	12395.2	7158.62	27086.3	11874.1
P62192	sp|P62192|PRS4_MOUSE	Psmc1	0.872473	0.322064	0.627711	7	384413	349172	315973	285193	324898	339690	523489	361312
Q9DAW9	sp|Q9DAW9|CNN3_MOUSE	Cnn3	1.31577	0.322317	0.628284	1	38796.2	44680.3	32784.1	19600	32809.2	29206.5	26524	14621.5
P50153	sp|P50153|GBG4_MOUSE	Gng4	1.50464	0.322676	0.628964	1	81986.6	75707.4	108939	64507	55961.4	68213.6	111901	19922.6
Q9QUP5	sp|Q9QUP5|HPLN1_MOUSE	Hapln1	0.856619	0.322702	0.629949	3	182022	124639	147181	131059	132798	152500	229125	175151
Q60960	sp|Q60960|IMA5_MOUSE	Kpna1	1.83009	0.322751	0.630825	1	68108.8	55090	23254.7	54003.9	34317.7	45917.4	47359.7	5628.77
Q9JHU9	sp|Q9JHU9|INO1_MOUSE	Isyna1	2.21671	0.325482	0.63464	1	14211.9	7218.96	1909.12	12889.5	5791.37	883.013	1741.12	11743.1
Q8K0T0	sp|Q8K0T0|RTN1_MOUSE	Rtn1	1.15838	0.325573	0.635234	5	412482	550882	442704	580866	541037	480058	340518	366927
P62918	sp|P62918|RL8_MOUSE	Rpl8	0.851518	0.325609	0.635744	1	75820	49633.1	40723.9	50469.2	74102	58821.8	64724.8	52145.8
P60766	sp|P60766|CDC42_MOUSE	Cdc42	1.4017	0.325671	0.635819	3	208014	200228	149676	263666	184138	74170	109927	283617
O89001	sp|O89001|CBPD_MOUSE	Cpd	2.08338	0.326237	0.637008	1	8299.7	2265.17	5793.91	11133.7	7326.68	835.186	1259.02	8355.57
O35381	sp|O35381|AN32A_MOUSE	Anp32a	1.4443	0.326953	0.637008	1	65000.9	47179.2	75586.7	58326.1	59310.2	71996.1	44575.6	16323.5
Q14BB9	sp|Q14BB9|MA6D1_MOUSE	Map6d1	0.597054	0.328863	0.637008	1	2681.72	16401.7	21627.9	12612.6	23919.3	13309.4	15048.7	19709
P08226	sp|P08226|APOE_MOUSE	Apoe	0.736802	0.329532	0.637008	1	11008.8	17461.5	20776.8	30309.4	20134.8	18480.9	24917.2	44299.8
Q62465	sp|Q62465|VAT1_MOUSE	Vat1	0.482577	0.330097	0.637008	2	11770.4	184402	193797	78063.6	219982	177260	183210	84750
Q60996	sp|Q60996|2A5G_MOUSE	Ppp2r5c	0.879901	0.330183	0.637008	2	57839	74515.3	76236.6	65339.3	70626.6	99098.4	61682.1	82961
P99029	sp|P99029|PRDX5_MOUSE	Prdx5	0.906352	0.330405	0.637008	12	1.87558e+06	2.27146e+06	1.86699e+06	2.56342e+06	2.37537e+06	2.23772e+06	2.68702e+06	2.11548e+06
P50544	sp|P50544|ACADV_MOUSE	Acadvl	1.14447	0.330526	0.637008	3	89927.2	100761	89932.2	112499	88755.4	83408.8	64123.2	112565
Q9JK48	sp|Q9JK48|SHLB1_MOUSE	Sh3glb1	0.255321	0.330807	0.639965	1	29496	165932	7732.22	13998.9	310717	354147	3833.09	295562
Q921F2	sp|Q921F2|TADBP_MOUSE	Tardbp	1.20352	0.331415	0.639965	3	87396.4	109634	154646	133499	90105.2	107601	73714.6	131924
Q8K2B3	sp|Q8K2B3|SDHA_MOUSE	Sdha	1.09926	0.331558	0.639965	14	1.55157e+06	1.39338e+06	1.10249e+06	1.38991e+06	1.37539e+06	1.16877e+06	1.08447e+06	1.30145e+06
Q9CRB9	sp|Q9CRB9|MIC19_MOUSE	Chchd3	0.464274	0.332306	0.639965	1	881609	438435	118395	554983	1.15266e+06	1.66372e+06	152002	1.87527e+06
Q9EPK2	sp|Q9EPK2|XRP2_MOUSE	Rp2	2.38895	0.332463	0.640379	1	1715.5	23690	37031.7	19274.1	1796.77	15757.9	4393.63	7159.11
Q3UZP4	sp|Q3UZP4|SVIP_MOUSE	Svip	0.535798	0.33463	0.641085	1	107228	7539.25	13089.3	38038.1	40891	40624.3	58904.2	49912.3
P48758	sp|P48758|CBR1_MOUSE	Cbr1	0.931907	0.334984	0.643732	11	1.16592e+06	917862	993103	957406	1.08661e+06	963907	1.08727e+06	1.18468e+06
P21460	sp|P21460|CYTC_MOUSE	Cst3	0.652878	0.335079	0.643732	1	13288.6	60885.5	73355.5	65727.8	70493.7	67857.8	74782	60020.2
P62482	sp|P62482|KCAB2_MOUSE	Kcnab2	1.95356	0.336019	0.643732	1	24729.4	37664	6735.09	45765.9	26974.7	4468.34	6191.44	26413.3
Q8VDD8	sp|Q8VDD8|WASH1_MOUSE	Washc1	0.489175	0.336547	0.643732	1	13414.9	189229	226158	202559	237635	190652	212631	210817
P19157	sp|P19157|GSTP1_MOUSE	Gstp1	1.16832	0.337085	0.643732	4	598891	664935	387915	634969	609718	467055	433454	426502
Q8BRU6	sp|Q8BRU6|VMAT2_MOUSE	Slc18a2	1.73884	0.337241	0.643732	1	3995.98	2511.66	9005.27	11529.2	3505.38	3892.81	1116.63	7480.52
Q9WTX5	sp|Q9WTX5|SKP1_MOUSE	Skp1	0.428291	0.337417	0.643732	1	133714	64265.4	3688.59	36835.8	58063.9	53500.9	71158.7	156975
Q9DB41	sp|Q9DB41|GHC2_MOUSE	Slc25a18	0.858855	0.338303	0.643801	2	442968	541531	567277	488548	743384	639982	643387	399177
P53986	sp|P53986|MOT1_MOUSE	Slc16a1	0.74322	0.338681	0.643801	2	23365.9	54057	35567.9	37797.7	72297.2	69332.6	28239.7	39315.9
O35127	sp|O35127|C10_MOUSE	Grcc10	2.35234	0.34146	0.644169	1	20275.5	10208	10650.3	11572.6	1170.15	2736.9	5015.62	51865.6
P47708	sp|P47708|RP3A_MOUSE	Rph3a	1.27703	0.341902	0.644169	4	151521	82390.9	139955	214426	152504	117652	87160.9	90075.4
Q8BR92	sp|Q8BR92|PALM2_MOUSE	Palm2	0.488911	0.342575	0.647149	1	10009.7	17007.5	10857.3	86003.2	67498.3	112799	28946.7	12623.4
P80316	sp|P80316|TCPE_MOUSE	Cct5	0.963834	0.342655	0.647149	10	615085	546122	632509	614366	599269	642655	627557	625829
O35593	sp|O35593|PSDE_MOUSE	Psmd14	0.842965	0.343237	0.647149	1	80064.9	40603.4	69021.4	75862	70567.3	80078.2	87362.1	68286.4
Q6WVG3	sp|Q6WVG3|KCD12_MOUSE	Kctd12	1.35997	0.343834	0.648186	1	105614	61821	62412.7	61900.3	24995	54824.1	59611.8	90270.4
Q9QZF2	sp|Q9QZF2|GPC1_MOUSE	Gpc1	1.41788	0.344649	0.648186	1	16827.3	15618.1	30658.9	6576.39	10169	12667.9	7688.07	13238
Q8BFR5	sp|Q8BFR5|EFTU_MOUSE	Tufm	0.951048	0.344896	0.648186	12	1.88166e+06	1.85676e+06	1.75349e+06	1.6615e+06	1.92782e+06	1.79567e+06	1.7331e+06	2.07383e+06
Q9CPV4	sp|Q9CPV4|GLOD4_MOUSE	Glod4	0.848948	0.346097	0.648186	6	222077	345099	278142	279259	325095	284833	260415	475258
Q810B6	sp|Q810B6|ANFY1_MOUSE	Ankfy1	1.18909	0.346242	0.648186	1	48333.4	22729.9	25776.4	27504.9	25069.4	23594.1	27016.2	24380.7
Q9D0R2	sp|Q9D0R2|SYTC_MOUSE	Tars	1.64702	0.34657	0.649195	2	209739	112615	103424	120801	146293	135342	99399.1	20376.6
Q9Z0P5	sp|Q9Z0P5|TWF2_MOUSE	Twf2	0.659068	0.347133	0.649229	2	19284.1	75796.2	54764.9	79425.9	79247.1	87498.6	39150.6	124128
Q5SWU9	sp|Q5SWU9|ACACA_MOUSE	Acaca	0.480512	0.347366	0.653859	2	79120	49589.4	58214.3	51864.1	70768.2	50451.8	60965.3	1.02084e+06
Q8C7D2	sp|Q8C7D2|CRBN_MOUSE	Crbn	1.73243	0.347766	0.654011	1	82287.7	61552.9	77673.3	64176	8244.05	74762.8	64443.1	70567.4
O35609	sp|O35609|SCAM3_MOUSE	Scamp3	0.788365	0.349715	0.654061	2	65448.6	38956.6	33106.6	55205	83113.1	67399.1	59072.3	36455
Q9CZV8	sp|Q9CZV8|FXL20_MOUSE	Fbxl20	0.48577	0.350402	0.654061	1	75344	15487.8	4058.73	46316.1	46047.2	38471.9	23044.2	96500.1
Q8R1Q8	sp|Q8R1Q8|DC1L1_MOUSE	Dync1li1	1.13922	0.350823	0.654478	7	693546	751080	569923	742584	758529	598804	444864	647743
Q61235	sp|Q61235|SNTB2_MOUSE	Sntb2	0.611581	0.350847	0.654921	1	2355.77	1713.86	6150.09	5734.29	5676.77	3739	3039.88	15774
Q9JME5	sp|Q9JME5|AP3B2_MOUSE	Ap3b2	1.10979	0.350868	0.655557	11	549197	547562	702520	681951	683419	549966	538798	468988
Q9QXV0	sp|Q9QXV0|PCSK1_MOUSE	Pcsk1n	1.71903	0.351107	0.655557	1	3661.2	2819	7618.9	771.072	2676.64	835.203	1678.93	1849.93
Q812A2	sp|Q812A2|SRGP3_MOUSE	Srgap3	1.35048	0.351469	0.656659	3	213524	182162	214271	173585	195290	62305.3	154079	231993
O70318	sp|O70318|E41L2_MOUSE	Epb41l2	0.927002	0.351472	0.656659	6	349734	302936	279330	315532	373374	290300	320182	364367
Q8CG76	sp|Q8CG76|ARK72_MOUSE	Akr7a2	0.767448	0.35212	0.656659	1	47569.6	39897.8	40373.4	29928.4	37375	38843	43445.4	104815
Q9CQD1	sp|Q9CQD1|RAB5A_MOUSE	Rab5a	0.829933	0.352469	0.656785	3	196071	306628	261015	273198	394943	363906	322950	194687
Q3UHB1	sp|Q3UHB1|NT5D3_MOUSE	Nt5dc3	2.47016	0.353308	0.656785	1	108296	77133.3	78911.7	87409.6	99697	79756.2	2411.99	80692.2
Q76LS9	sp|Q76LS9|MINY1_MOUSE	Mindy1	1.49275	0.354454	0.656851	1	111060	32659	22654.6	37016.3	19068.2	21895.5	30521.1	48072.2
Q61097	sp|Q61097|KSR1_MOUSE	Ksr1	1.71536	0.354896	0.658324	2	138907	157909	58400.1	101023	14798.4	90744.2	82058.7	135638
Q61327	sp|Q61327|SC6A3_MOUSE	Slc6a3	0.728483	0.355948	0.658324	1	33590.6	42232.6	35703.1	20405.4	57312.5	41465.4	74311.5	20780.1
Q8JZW5	sp|Q8JZW5|SH2D5_MOUSE	Sh2d5	2.10771	0.357804	0.658324	1	40625.5	10512.9	37411.5	18701.6	32427.2	1585.47	23480.4	12542.6
Q8BTX9	sp|Q8BTX9|HSDL1_MOUSE	Hsdl1	0.417897	0.357971	0.658324	1	126971	60237.5	53230.9	3237.96	76544.8	69513.3	206669	39307.2
P09103	sp|P09103|PDIA1_MOUSE	P4hb	1.09913	0.358029	0.658324	3	126650	123725	107011	89467.8	98241.8	112771	104688	88628.4
Q8VED9	sp|Q8VED9|LEGL_MOUSE	Lgalsl	1.22346	0.35822	0.658324	1	68674.1	88567	84669.2	87359.6	85646.9	54898.9	99264.8	43019.6
Q9Z2X1	sp|Q9Z2X1|HNRPF_MOUSE	Hnrnpf	1.6179	0.358374	0.658324	1	202967	111679	124192	126094	93298.8	22130.6	162562	154343
P20444	sp|P20444|KPCA_MOUSE	Prkca	1.04634	0.359302	0.658324	2	178900	169730	153726	183924	155178	168708	159907	171089
B1AWN6	sp|B1AWN6|SCN2A_MOUSE	Scn2a	1.35504	0.359483	0.658821	1	29825	52899.8	52308.5	39973.9	42107.6	51245.6	30912.9	14669.5
Q5NCF2	sp|Q5NCF2|TPPC1_MOUSE	Trappc1	0.870029	0.360541	0.658821	1	39973.8	29167.9	26784.5	29907.5	31340.3	48954.9	35365.2	30042.3
O70503	sp|O70503|DHB12_MOUSE	Hsd17b12	0.459512	0.360985	0.659704	1	30917.5	105449	95689.3	4952.8	94021	133727	95579.7	28838
P50171	sp|P50171|DHB8_MOUSE	Hsd17b8	0.677857	0.362769	0.661157	1	41225.5	52569.6	36842.8	24499.8	42851.1	53113.6	149875	27162.2
Q5SSM3	sp|Q5SSM3|RHG44_MOUSE	Arhgap44	1.07131	0.362849	0.661296	2	79044.2	71486.7	87816.7	87145.4	84688	78307.5	74390	66545.6
O35526	sp|O35526|STX1A_MOUSE	Stx1a	1.21532	0.362999	0.662571	3	108609	151502	162651	134004	123169	108256	170442	72338.8
Q6VNB8	sp|Q6VNB8|WDFY3_MOUSE	Wdfy3	1.74624	0.363051	0.663655	1	7977.87	2106.42	5736.4	2606.29	1447.9	2513.74	917.394	8092.11
Q9QYB5	sp|Q9QYB5|ADDG_MOUSE	Add3	0.73502	0.363148	0.663655	2	31769.7	91706.6	44040.9	109014	81767.7	104041	90287.8	62393.9
Q9Z1R2	sp|Q9Z1R2|BAG6_MOUSE	Bag6	0.846551	0.363382	0.663655	1	38014.9	30903	44752.7	43294.3	31760.3	63489.2	51548.1	42637.8
Q02384	sp|Q02384|SOS2_MOUSE	Sos2	0.691364	0.363396	0.663655	1	7680.68	18574.6	25078.1	17837.5	15506.7	32067	41883	13412.4
Q6PAJ1	sp|Q6PAJ1|BCR_MOUSE	Bcr	2.00037	0.365219	0.663655	1	53074.9	46573.2	10334.8	49995.3	24199.1	33404.4	2923.17	33756.6
Q9CWJ9	sp|Q9CWJ9|PUR9_MOUSE	Atic	1.17564	0.365518	0.664342	5	376106	272222	220399	284177	166416	277000	263832	276011
Q8C854	sp|Q8C854|MYEF2_MOUSE	Myef2	0.487426	0.365677	0.664342	1	26044.7	926.951	8069.95	12244.2	16109.2	9421.78	20662.7	13475.7
Q8BQP9	sp|Q8BQP9|R7BP_MOUSE	Rgs7bp	0.613346	0.365707	0.665425	1	56547	41635.5	7803.88	39513.6	46190.8	32289.9	38323.5	89747.6
Q8BH04	sp|Q8BH04|PCKGM_MOUSE	Pck2	0.705512	0.366371	0.665425	1	75927.9	16255.3	45293.3	35057.7	39752.1	41184.4	70250.5	68779
Q9CQ69	sp|Q9CQ69|QCR8_MOUSE	Uqcrq	0.65421	0.367124	0.665425	1	112342	87855.7	18567.8	88866.6	110085	101779	65810	120578
P20029	sp|P20029|GRP78_MOUSE	Hspa5	1.15682	0.367219	0.665425	2	117376	95343.8	116138	115327	108559	91137.9	127835	66176.5
O55125	sp|O55125|NIPS1_MOUSE	Nipsnap1	0.888275	0.367653	0.665425	3	253796	448298	334366	321019	396024	339931	374250	389349
Q62167	sp|Q62167|DDX3X_MOUSE	Ddx3x	0.864751	0.367966	0.665425	9	533809	423715	359576	415688	414986	568963	656734	389894
Q91VM9	sp|Q91VM9|IPYR2_MOUSE	Ppa2	0.561176	0.368842	0.665425	1	25978.2	23004.6	16102.9	18185.6	88982.6	21918.9	8887.2	101805
P11983	sp|P11983|TCPA_MOUSE	Tcp1	0.951526	0.370074	0.665425	11	1.08056e+06	1.00533e+06	1.05308e+06	994597	946049	1.13571e+06	1.10281e+06	1.17139e+06
Q8C6E0	sp|Q8C6E0|CFA36_MOUSE	Cfap36	1.99904	0.372065	0.665425	1	15549.4	10140.5	9428.24	6085.56	4031.59	1163.91	3726.6	32397.7
Q8R016	sp|Q8R016|BLMH_MOUSE	Blmh	0.528484	0.373111	0.666943	1	89744.6	9069.57	7037.06	15053.2	38265.4	29276.1	14129.5	69829.8
Q6PAV2	sp|Q6PAV2|HERC4_MOUSE	Herc4	1.13762	0.374617	0.666943	1	80858.5	43404.3	66115.4	56974.6	51519.1	57901.2	52402.1	50495
P61161	sp|P61161|ARP2_MOUSE	Actr2	1.46038	0.374745	0.666943	6	257986	889650	694617	811168	643865	493110	482544	185579
P35283	sp|P35283|RAB12_MOUSE	Rab12	0.69625	0.375544	0.666943	1	6641.79	11866.8	17182.7	29644.2	23029.9	34912.8	14315.8	14842.2
Q9D2N4	sp|Q9D2N4|DTNA_MOUSE	Dtna	1.13555	0.376426	0.667477	1	74161.7	45792.4	62421.1	53261.2	44080.5	47807	64828.7	49702.7
P62830	sp|P62830|RL23_MOUSE	Rpl23	1.36409	0.377181	0.667672	2	59557.2	129600	127999	106143	114690	113159	62746.8	37192.9
P63163	sp|P63163|RSMN_MOUSE	Snrpn	0.815722	0.377521	0.667672	1	40985.7	22466.6	22196.2	31115.2	28103.2	34830.7	27369.6	53612.4
Q8VHL1	sp|Q8VHL1|SETD7_MOUSE	Setd7	0.419764	0.377535	0.66768	1	10661.4	3457.55	12758.1	19474.5	2610.15	16336.7	111592	61993.7
Q6PB44	sp|Q6PB44|PTN23_MOUSE	Ptpn23	1.82304	0.378909	0.66768	3	74930.2	45363.2	73735.9	9780.06	16628.9	7660.86	37827.3	46051.9
O88741	sp|O88741|GDAP1_MOUSE	Gdap1	0.87943	0.380038	0.668596	4	276778	187542	195652	206177	252318	187194	309193	239706
Q920E5	sp|Q920E5|FPPS_MOUSE	Fdps	2.60156	0.380843	0.670154	1	71305.6	1852.68	69402.6	55713.7	41012.6	6321.84	8818.99	4876.9
P18760	sp|P18760|COF1_MOUSE	Cfl1	1.08576	0.381595	0.673082	11	2.98665e+06	2.38739e+06	2.37609e+06	3.13302e+06	2.69833e+06	2.19141e+06	2.43339e+06	2.65441e+06
O55102	sp|O55102|BL1S1_MOUSE	Bloc1s1	0.625806	0.382071	0.674296	1	54175	36709.2	29842.7	21976.3	61906.4	14184.8	92289.4	104929
Q61644	sp|Q61644|PACN1_MOUSE	Pacsin1	1.18443	0.383126	0.675893	5	246529	264357	287693	223760	140605	280945	287361	187791
Q9ERK4	sp|Q9ERK4|XPO2_MOUSE	Cse1l	1.11278	0.383144	0.675893	6	230235	211362	240712	211605	172076	171902	200180	273006
Q9JIA1	sp|Q9JIA1|LGI1_MOUSE	Lgi1	0.943203	0.384104	0.676656	8	897366	803130	966514	902147	918750	954776	845275	1.07083e+06
P21278	sp|P21278|GNA11_MOUSE	Gna11	1.08516	0.386014	0.67753	3	680319	702814	782559	670143	691901	712236	714902	513276
Q60676	sp|Q60676|PPP5_MOUSE	Ppp5c	1.34144	0.386702	0.67753	1	148018	83911.8	61013.5	93037.9	74325.1	74872.8	33846.7	115603
P69566	sp|P69566|RANB9_MOUSE	Ranbp9	1.57544	0.387559	0.67753	1	31687.4	30987.1	19498.1	26610	24885.1	20886.9	4274.94	37217.8
Q80U40	sp|Q80U40|RIMB2_MOUSE	Rimbp2	0.829317	0.388873	0.67753	1	18685.1	26152.9	24388.4	22442	30919.5	23705.6	43149.4	17877.9
Q6ZQ29	sp|Q6ZQ29|TAOK2_MOUSE	Taok2	1.152	0.389566	0.679319	1	43419.8	39581.8	36798.5	32837.7	44957.6	24676.2	38613.6	27526.3
Q63836	sp|Q63836|SBP2_MOUSE	Selenbp2	1.31691	0.389566	0.680665	3	186817	118779	113269	133882	54610.4	170539	155018	77497.4
Q8R1B4	sp|Q8R1B4|EIF3C_MOUSE	Eif3c	1.13861	0.390389	0.681429	2	149060	98439.4	135219	110211	80035.3	107086	117248	129471
Q7TME0	sp|Q7TME0|PLPR4_MOUSE	Plppr4	1.40151	0.390804	0.682096	1	16268.5	19229.3	23864.8	19932	6637.64	8749.63	26698	24874.5
Q00612	sp|Q00612|G6PD1_MOUSE	G6pdx	1.22617	0.391052	0.682269	3	147489	142870	130413	150593	157394	101389	66719.4	171943
P70407	sp|P70407|CADH9_MOUSE	Cdh9	0.480369	0.391224	0.682831	1	5968	31257.1	14076	3100.08	47959.1	8716.7	5553.52	65846.9
Q9CZ42	sp|Q9CZ42|NNRD_MOUSE	Naxd	1.18138	0.39213	0.682831	4	166229	175535	189234	172343	192951	115832	210996	103596
Q8K406	sp|Q8K406|LGI3_MOUSE	Lgi3	0.824626	0.39223	0.683865	3	35683.7	51685.6	61058.2	63978	46706.1	51517.9	67208.1	96345.9
O55023	sp|O55023|IMPA1_MOUSE	Impa1	1.04698	0.39341	0.686586	4	520217	456906	517481	458016	435948	451631	465646	511397
Q91YJ2	sp|Q91YJ2|SNX4_MOUSE	Snx4	1.28724	0.394624	0.687131	2	47911.1	42163.5	29034	62005.9	32256.4	65120.1	24287	25964.1
Q9R1T4	sp|Q9R1T4|SEPT6_MOUSE	Septin6	1.12467	0.394674	0.687975	4	372306	461555	482293	480673	409399	429850	289104	489402
Q9EPJ9	sp|Q9EPJ9|ARFG1_MOUSE	Arfgap1	1.12406	0.394854	0.689498	1	43060.1	57718.2	60107.5	49406.9	41504.9	42256.5	63001.6	41840.7
Q99KC8	sp|Q99KC8|VMA5A_MOUSE	Vwa5a	1.41902	0.39643	0.689498	3	114819	47248	62627.3	43775.7	17440.5	48713.1	65490.5	65925.6
Q9R0Q7	sp|Q9R0Q7|TEBP_MOUSE	Ptges3	0.552876	0.397678	0.689498	2	125605	119569	60577.3	8924.07	73378.3	118944	152963	65086.2
P62827	sp|P62827|RAN_MOUSE	Ran	0.904432	0.39841	0.68972	4	398434	591970	502903	552950	558152	680230	512452	503804
P63216	sp|P63216|GBG3_MOUSE	Gng3	1.9619	0.398578	0.68972	1	128395	113350	134274	123881	152152	104130	147494	6992.41
Q7TN29	sp|Q7TN29|SMAP2_MOUSE	Smap2	0.895658	0.399459	0.68972	2	141437	114392	146792	128336	123214	122820	166163	188356
Q9CRB8	sp|Q9CRB8|MTFP1_MOUSE	Mtfp1	0.799249	0.399734	0.68972	1	77199	29568	44347.7	49499.9	44124.4	55511.3	55875.4	89722.1
P70202	sp|P70202|LXN_MOUSE	Lxn	1.07549	0.400884	0.69014	2	166210	185865	225563	180330	168122	200463	173599	160532
P09405	sp|P09405|NUCL_MOUSE	Ncl	0.779211	0.401068	0.69014	1	7667.82	21662.6	14090.7	24465.1	20393.2	20988.2	23350	15541.5
Q61234	sp|Q61234|SNTA1_MOUSE	Snta1	0.809488	0.401206	0.691541	1	258425	137840	120451	137678	192905	131146	190074	286101
Q9CWF2	sp|Q9CWF2|TBB2B_MOUSE	Tubb2b	0.777526	0.401905	0.692052	1	439944	136160	173480	177735	308971	222732	221478	331572
P53996	sp|P53996|CNBP_MOUSE	Cnbp	0.588294	0.402117	0.692052	1	53614.8	58655	32937.8	5168.44	29956.9	43881.6	53776.7	63225.7
Q4VAA2	sp|Q4VAA2|CDV3_MOUSE	Cdv3	1.83989	0.402446	0.692052	1	12050.9	16053.9	1570.98	9035.21	3607.72	5453.19	1259.25	9672.89
P05132	sp|P05132|KAPCA_MOUSE	Prkaca	0.93676	0.40394	0.694139	3	285536	300252	320356	254242	296813	360044	280279	302750
Q8VHI6	sp|Q8VHI6|WASF3_MOUSE	Wasf3	0.599382	0.404361	0.695647	1	26648.1	3238.38	13163.4	31882	34833.3	21518.4	30841.1	12138.3
P27773	sp|P27773|PDIA3_MOUSE	Pdia3	0.878868	0.404748	0.695869	8	228917	278696	249627	245846	288975	192538	362365	325496
P67778	sp|P67778|PHB_MOUSE	Phb	1.14331	0.407782	0.695869	7	438229	663016	577522	720465	496945	504009	413654	682911
Q99MN9	sp|Q99MN9|PCCB_MOUSE	Pccb	1.10318	0.408283	0.696536	6	322200	213627	245409	197547	231977	205001	215997	219337
O08808	sp|O08808|DIAP1_MOUSE	Diaph1	1.62416	0.409128	0.696536	1	4807.36	2055.17	10542.3	7696.94	4230.94	1209.03	2590.26	8695.01
Q5SYD0	sp|Q5SYD0|MYO1D_MOUSE	Myo1d	0.651234	0.410498	0.697076	2	109741	14305.6	25757.5	63669.4	92756.1	62512.3	40882.6	60383.1
Q3UUI3	sp|Q3UUI3|THEM4_MOUSE	Them4	1.62728	0.411576	0.697076	1	28974.7	27074.3	27643.1	26827.4	26226.8	20603	44127.7	3479.38
Q9Z1S5	sp|Q9Z1S5|SEPT3_MOUSE	Septin3	1.09466	0.41236	0.697076	7	1.33312e+06	1.67954e+06	1.97844e+06	1.67269e+06	1.56828e+06	1.67947e+06	1.55958e+06	1.25625e+06
P10518	sp|P10518|HEM2_MOUSE	Alad	0.508362	0.412743	0.697212	1	44873.2	5367.77	26862.6	5059.04	5451.86	46278.1	50332.1	38595.7
Q9WV69	sp|Q9WV69|DEMA_MOUSE	Dmtn	1.37353	0.415057	0.697212	2	140963	101483	116583	92910.5	32906.2	66147.3	134551	148649
O54784	sp|O54784|DAPK3_MOUSE	Dapk3	0.689578	0.415521	0.697212	1	48298	26753.8	22900.4	10237.7	40771.2	57055.6	15365.8	37481.8
Q9CX56	sp|Q9CX56|PSMD8_MOUSE	Psmd8	0.769649	0.416828	0.699127	1	110466	59216.1	61891.8	37790.8	88903.8	58753.3	59738.5	139737
Q14BI2	sp|Q14BI2|GRM2_MOUSE	Grm2	1.09346	0.417411	0.69918	5	301896	398226	261185	378383	296945	280686	313523	318045
Q9JI46	sp|Q9JI46|NUDT3_MOUSE	Nudt3	1.04042	0.418434	0.69918	1	162121	131715	141978	141761	136119	140464	134157	142994
Q80U78	sp|Q80U78|PUM1_MOUSE	Pum1	1.91987	0.420065	0.703746	1	30903.2	11404.4	11737.6	8516.73	999.789	15654.6	23216	7136.79
Q61024	sp|Q61024|ASNS_MOUSE	Asns	1.19275	0.421321	0.703935	1	47150.3	42441.4	52194.3	43754.4	27238.5	44312.4	29198.7	64069.8
Q62188	sp|Q62188|DPYL3_MOUSE	Dpysl3	0.798017	0.42354	0.704718	6	480849	640325	537602	437042	998344	444431	1.00158e+06	401399
P26450	sp|P26450|P85A_MOUSE	Pik3r1	1.47334	0.425162	0.706402	1	38396.5	19763.9	18619.1	15310.6	15887.6	16601	4928.04	35320.8
Q99PJ0	sp|Q99PJ0|NTRI_MOUSE	Ntm	0.660824	0.425678	0.707581	1	14821	21142.8	30110.5	71290.5	24758.8	89956.1	23017.2	68807.1
O54734	sp|O54734|OST48_MOUSE	Ddost	0.777473	0.425821	0.708234	3	195941	105443	109801	156399	82410.4	232826	235991	214453
Q9QUJ7	sp|Q9QUJ7|ACSL4_MOUSE	Acsl4	1.39435	0.426319	0.708234	1	34254.6	16642.4	28469.2	52092	10281	36807	16642.1	35515.7
P62751	sp|P62751|RL23A_MOUSE	Rpl23a	0.651003	0.426364	0.711526	1	52749.1	59605.3	8199.62	57618.9	52677.6	60841.2	70229.2	36744
Q80UG5	sp|Q80UG5|SEPT9_MOUSE	Septin9	1.04746	0.426427	0.711643	4	323022	359402	393835	343326	341877	344376	361389	306489
Q8R050	sp|Q8R050|ERF3A_MOUSE	Gspt1	1.4166	0.426508	0.713204	1	19119.7	29324.2	26802.3	19833.3	28525.4	22704.5	22331.1	5117.15
A3KMP2	sp|A3KMP2|TTC38_MOUSE	Ttc38	1.11561	0.426669	0.713523	2	67624.4	71185.5	62559	58868.8	45898.5	58333.6	52692.3	81123.9
Q8R2Y0	sp|Q8R2Y0|ABHD6_MOUSE	Abhd6	1.34601	0.427217	0.714594	1	27926.4	27952.4	44534.6	29867.4	35250.6	8829.87	33054.8	30745.5
Q8VEH3	sp|Q8VEH3|ARL8A_MOUSE	Arl8a	0.848068	0.427913	0.716698	1	72156.8	69560.1	47487.2	76087.9	83105.4	101254	48258.5	86335.9
Q60771	sp|Q60771|CLD11_MOUSE	Cldn11	0.534535	0.428958	0.718161	1	12144.6	25063.2	27318.9	2609.06	39426.3	45161.5	28656.5	5208.15
P14685	sp|P14685|PSMD3_MOUSE	Psmd3	0.776824	0.429131	0.721131	5	278060	141381	93309.9	117363	190277	153932	131950	305897
Q9DCS3	sp|Q9DCS3|MECR_MOUSE	Mecr	0.69897	0.429211	0.721131	1	83996.9	72226.1	20689.4	26805.1	105366	37932.8	77473.5	45522.1
P10637	sp|P10637|TAU_MOUSE	Mapt	1.12178	0.430859	0.721131	7	574323	877717	712741	795302	802469	615840	723602	504594
Q52KR3	sp|Q52KR3|PRUN2_MOUSE	Prune2	1.94358	0.431856	0.721131	1	8469	18203.6	20299.2	18705.2	13548	835.068	15578.8	23274.8
D3Z7P3	sp|D3Z7P3|GLSK_MOUSE	Gls	1.0812	0.432083	0.721131	11	1.31753e+06	1.23978e+06	1.10176e+06	1.33823e+06	1.42918e+06	1.11806e+06	962203	1.14623e+06
O35633	sp|O35633|VIAAT_MOUSE	Slc32a1	1.2122	0.432233	0.721131	2	38139.2	66463.1	79427.7	66424	67393.5	60279.2	47475.3	32114.7
Q9WV34	sp|Q9WV34|MPP2_MOUSE	Mpp2	1.042	0.432665	0.721131	5	425414	407762	488497	463165	425042	396570	447191	441679
P36916	sp|P36916|GNL1_MOUSE	Gnl1	0.900595	0.434758	0.721131	6	377267	279345	237131	368119	292262	353605	360542	375320
Q60870	sp|Q60870|REEP5_MOUSE	Reep5	0.699576	0.435843	0.721131	2	24404.9	62695.4	15749.1	31652.2	82142.1	21940.4	62860	28109.4
P61759	sp|P61759|PFD3_MOUSE	Vbp1	0.634815	0.436807	0.721379	1	70726.5	8043.15	23472	8595.36	20475.6	36180.7	21568.7	44227.8
Q9CWK8	sp|Q9CWK8|SNX2_MOUSE	Snx2	1.21651	0.436861	0.721878	2	133382	130467	89932.5	150127	150623	79193.9	64783.3	138822
Q68FL4	sp|Q68FL4|SAHH3_MOUSE	Ahcyl2	0.356873	0.437103	0.722037	1	319212	6724.49	98076.7	38693.9	365055	378360	9139.84	397823
P46096	sp|P46096|SYT1_MOUSE	Syt1	0.886684	0.438064	0.722037	16	2.20132e+06	3.29013e+06	2.3893e+06	3.57228e+06	3.28058e+06	3.54415e+06	3.47527e+06	2.47506e+06
Q9CQM5	sp|Q9CQM5|TXD17_MOUSE	Txndc17	1.3336	0.43855	0.722037	1	40698.1	33351.2	37699.8	29215.5	35318.1	24692.5	51509.4	10521.7
Q8BYI8	sp|Q8BYI8|F234B_MOUSE	Fam234b	0.752864	0.438616	0.724132	1	257703	212576	97943.4	214332	391933	257311	114885	308955
O35083	sp|O35083|PLCA_MOUSE	Agpat1	1.11157	0.439931	0.724413	1	144169	128713	111441	112348	87195.9	114197	102683	148838
O70493	sp|O70493|SNX12_MOUSE	Snx12	1.17027	0.441619	0.724413	2	88106.2	106116	116593	113114	111501	79274.6	129000	57655.2
Q61037	sp|Q61037|TSC2_MOUSE	Tsc2	2.26383	0.441945	0.724413	1	14168.1	31504.3	24960.6	37722.5	45418	837.82	53887.5	7803.66
P80315	sp|P80315|TCPD_MOUSE	Cct4	1.07093	0.442228	0.724462	9	775876	761670	883125	788986	678959	778152	649777	911861
Q9DBL9	sp|Q9DBL9|ABHD5_MOUSE	Abhd5	1.62635	0.442635	0.727291	1	11434.6	8873.89	8020.11	5216.71	2042.7	11105.8	15614.9	1713.02
O35129	sp|O35129|PHB2_MOUSE	Phb2	1.60312	0.443565	0.728428	2	59009.5	112151	85070.6	48289.3	40567	14189.4	195983	36487
Q924M7	sp|Q924M7|MPI_MOUSE	Mpi	0.585448	0.444251	0.728505	1	75949.9	13150.6	74165.5	17023	48219.8	16898	123748	106453
Q640R3	sp|Q640R3|HECAM_MOUSE	Hepacam	0.582967	0.444265	0.728505	1	18400.3	26932.8	2356.25	34428.2	30409.9	12389.8	38913.1	23740.6
P63323	sp|P63323|RS12_MOUSE	Rps12	0.48486	0.447005	0.728505	1	36277	2737.49	64301.6	63299.1	32079.7	23235.8	48785.1	201123
Q7TSJ2	sp|Q7TSJ2|MAP6_MOUSE	Map6	1.04994	0.447233	0.729002	11	677253	593093	694546	661201	722639	595237	595178	592914
Q66L44	sp|Q66L44|CBARP_MOUSE	Cbarp	0.588557	0.447254	0.729002	1	25820.8	23861.9	28541.9	36951.9	8420.43	51677.2	66509.9	187119
P12367	sp|P12367|KAP2_MOUSE	Prkar2a	0.890337	0.447999	0.729002	4	209415	227157	151895	239657	274112	236947	172085	246563
Q8R307	sp|Q8R307|VPS18_MOUSE	Vps18	0.512878	0.448959	0.730512	1	54026	1695.56	13193.8	41000.7	16887.9	48617.6	39736.8	21951.3
Q9DCP2	sp|Q9DCP2|S38A3_MOUSE	Slc38a3	1.13399	0.449669	0.7323	1	242687	192233	153734	209200	199025	155798	130053	225000
P28474	sp|P28474|ADHX_MOUSE	Adh5	0.613259	0.449872	0.7323	1	53200.5	48754.5	60990.8	5185.07	36690.6	49028.8	72348.4	44559.3
Q921G8	sp|Q921G8|GCP2_MOUSE	Tubgcp2	1.24626	0.451874	0.7323	1	24337.1	36730	30103.2	16975.8	14557.7	24731.3	14700.4	35779.1
Q91ZR1	sp|Q91ZR1|RAB4B_MOUSE	Rab4b	1.56438	0.452357	0.7323	1	16875.8	4704.03	13193.6	6977.09	3340.13	2821.71	5675.28	22811
P60335	sp|P60335|PCBP1_MOUSE	Pcbp1	1.06742	0.453856	0.732977	4	701656	678482	729561	514927	576083	618449	628261	615455
A2CG49	sp|A2CG49|KALRN_MOUSE	Kalrn	1.36903	0.453955	0.732977	1	91976	52932.4	61426.1	31573.8	41362.1	64417.9	62764.9	16073.1
O08709	sp|O08709|PRDX6_MOUSE	Prdx6	1.1366	0.455243	0.732977	9	1.75716e+06	2.42847e+06	2.61871e+06	2.40505e+06	1.88431e+06	1.83495e+06	2.94312e+06	1.5825e+06
Q9DCZ4	sp|Q9DCZ4|MIC26_MOUSE	Apoo	0.928639	0.457164	0.735883	1	91814.1	80271.3	76243.5	77511.6	77572.2	76352.1	90671.6	109057
P61358	sp|P61358|RL27_MOUSE	Rpl27	0.646537	0.457404	0.735883	1	10448.8	62115.7	135005	68722.7	89871.8	71729.4	72269	73972.9
Q6PDL0	sp|Q6PDL0|DC1L2_MOUSE	Dync1li2	1.53833	0.457529	0.735883	3	687672	237385	279599	281771	103776	295024	98599.2	760747
Q8K0S0	sp|Q8K0S0|PHYIP_MOUSE	Phyhip	1.15674	0.457803	0.736437	6	615589	889759	442223	889767	578443	723692	512026	561612
Q91V41	sp|Q91V41|RAB14_MOUSE	Rab14	0.86054	0.457839	0.737342	7	576675	708965	587411	440847	827720	493452	510854	925288
Q8BGT8	sp|Q8BGT8|PHIPL_MOUSE	Phyhipl	1.11717	0.458122	0.737495	3	98184.2	149155	150042	149733	100257	155111	113500	119669
Q9WU78	sp|Q9WU78|PDC6I_MOUSE	Pdcd6ip	1.23692	0.458674	0.737495	4	102967	104742	112340	101818	125720	58430.8	49757.2	144183
Q8CFW1	sp|Q8CFW1|ANO2_MOUSE	Ano2	0.636755	0.46029	0.740103	1	54939.9	24026.4	6812.49	19287.6	25040	13099.5	41248.7	77977.5
Q9Z2W0	sp|Q9Z2W0|DNPEP_MOUSE	Dnpep	1.15885	0.460381	0.740221	1	64862.2	48181.9	44935.5	43647.5	59296.4	50117.2	27742	41225.6
Q9D0I9	sp|Q9D0I9|SYRC_MOUSE	Rars	1.21079	0.46041	0.741487	3	107716	118849	151468	134838	147929	105103	143169	54653
Q8R5H1	sp|Q8R5H1|UBP15_MOUSE	Usp15	1.27515	0.46074	0.741487	1	22396.4	16127.9	23031.9	17592.7	17438.5	6437.73	23291.1	21170.9
Q9WV92	sp|Q9WV92|E41L3_MOUSE	Epb41l3	0.950501	0.46115	0.742916	5	261057	234625	241236	223562	217745	264257	283021	248510
Q922Q4	sp|Q922Q4|P5CR2_MOUSE	Pycr2	0.775401	0.462116	0.74357	2	177407	59416.4	55871	102526	140751	67743	118761	147504
P26040	sp|P26040|EZRI_MOUSE	Ezr	0.542123	0.464559	0.74357	1	164089	188223	7730.98	178953	148039	158766	132946	158316
Q920P5	sp|Q920P5|KAD5_MOUSE	Ak5	1.12386	0.464879	0.74357	2	101810	76172.4	62032.8	89109.6	72167.9	86132	53580.9	80680.9
Q6ZPQ6	sp|Q6ZPQ6|PITM2_MOUSE	Pitpnm2	0.833543	0.465126	0.74357	1	19142.6	29459.2	37766.4	36574.9	24509.2	29420.3	42524.3	52624.2
P54071	sp|P54071|IDHP_MOUSE	Idh2	0.955598	0.467149	0.74357	8	488303	550240	526160	577251	581864	526495	510816	625379
O88447	sp|O88447|KLC1_MOUSE	Klc1	1.27032	0.469615	0.74357	1	14529.9	23705.5	27528.7	22034.1	35476.3	18673.2	11292.7	10724.5
Q9WUA6	sp|Q9WUA6|AKT3_MOUSE	Akt3	1.66671	0.46988	0.743795	1	46532.2	46966	36020.2	37741.2	57712.6	38776.9	3504.41	49090.5
P97855	sp|P97855|G3BP1_MOUSE	G3bp1	0.567386	0.469997	0.744457	1	17653.8	6415.98	6449.97	1963.81	2507.62	9404.8	42053.4	13958.2
P63037	sp|P63037|DNJA1_MOUSE	Dnaja1	1.52652	0.470224	0.744457	1	19487.9	27297.7	29370.8	33540	25249.1	4683.14	13592.7	60043.8
Q922B2	sp|Q922B2|SYDC_MOUSE	Dars	0.953838	0.470984	0.744457	9	765209	766221	727653	730313	715122	886974	848304	699561
Q8R3Z5	sp|Q8R3Z5|CACB1_MOUSE	Cacnb1	1.19635	0.471458	0.744457	1	57462.7	36478.6	63380.1	47619.8	74778.5	30227.5	35685.7	38287.7
Q8BP00	sp|Q8BP00|IQCB1_MOUSE	Iqcb1	0.795763	0.471681	0.744457	1	11113	6822.4	4815.06	5148.88	4343.45	8215.82	11689.3	11237.6
P35585	sp|P35585|AP1M1_MOUSE	Ap1m1	1.15235	0.472186	0.745348	3	115426	109143	146546	148239	104700	108236	78210.1	175111
Q925I1	sp|Q925I1|ATAD3_MOUSE	Atad3	0.900079	0.472578	0.748192	3	366767	279487	259238	295559	237569	345561	405358	359599
Q9D1A2	sp|Q9D1A2|CNDP2_MOUSE	Cndp2	0.924447	0.473033	0.748192	4	331717	284963	207378	278048	300304	270324	295337	311277
Q99MI1	sp|Q99MI1|RB6I2_MOUSE	Erc1	1.70693	0.473194	0.748192	1	170630	29095.2	31606.8	11313.9	29628.1	6482.92	42608.2	25553
Q9D7A8	sp|Q9D7A8|ARMC1_MOUSE	Armc1	1.30912	0.473909	0.750775	1	10233.4	34895	12413.6	31535.7	20305.4	18239.6	12437.7	10332.3
Q8BPU7	sp|Q8BPU7|ELMO1_MOUSE	Elmo1	1.16639	0.474115	0.7509	1	64697.7	54210.3	35260.7	40282.3	41193.4	35843	30236.1	60289.4
P14602	sp|P14602|HSPB1_MOUSE	Hspb1	1.43214	0.47418	0.7509	1	43032.6	24644.4	14566	21984	8601.35	9752.73	18260.1	52702.1
Q9Z0J4	sp|Q9Z0J4|NOS1_MOUSE	Nos1	2.13826	0.474402	0.7509	1	4391.6	28778.2	31546.1	28884.7	2170.86	40152	37898.7	1667.6
P05213	sp|P05213|TBA1B_MOUSE	Tuba1b	1.05743	0.474451	0.7509	4	4.57617e+06	4.87402e+06	5.69834e+06	4.87277e+06	5.1383e+06	5.03709e+06	4.77171e+06	4.01086e+06
P35762	sp|P35762|CD81_MOUSE	Cd81	1.25091	0.475232	0.7509	3	478749	370358	296311	467310	407127	287396	155511	551076
Q3UEB3	sp|Q3UEB3|PUF60_MOUSE	Puf60	0.507225	0.475425	0.7509	1	15893.9	22358.1	23120.6	35307.8	145500	8789.34	11964	286443
Q9CQH3	sp|Q9CQH3|NDUB5_MOUSE	Ndufb5	0.521806	0.475497	0.7509	1	41328.6	29755.7	1882.36	32207.6	8928.56	68661.8	32618	50291.2
B9EHT4	sp|B9EHT4|CLIP3_MOUSE	Clip3	1.20218	0.47557	0.7509	1	21744.8	16932.8	18518.3	12931.2	11428.6	15639	9357.64	25238.9
P56391	sp|P56391|CX6B1_MOUSE	Cox6b1	1.28229	0.478694	0.7509	1	14175.4	22291.2	24466.2	20883.2	23612.2	24299.4	15946.7	6526.51
Q3UH66	sp|Q3UH66|WNK2_MOUSE	Wnk2	1.15983	0.479697	0.7509	2	62458.3	85813	84885.2	75361.6	80280.4	70120.8	86770.4	38789.7
Q8C985	sp|Q8C985|NRX3B_MOUSE	Nrxn3	1.59079	0.479871	0.7509	1	190921	287106	190338	196028	45843.8	450099	48059.8	322045
Q6PA06	sp|Q6PA06|ATLA2_MOUSE	Atl2	1.63484	0.480743	0.7509	1	6895.27	24884.2	34058.5	25460.5	2620.13	22876.3	30597.6	11357.2
Q922W5	sp|Q922W5|P5CR1_MOUSE	Pycr1	2.06578	0.481787	0.7509	1	68028	39815.5	43446.1	39931.5	60190.8	1291.25	44345.1	74865.8
Q9EPK7	sp|Q9EPK7|XPO7_MOUSE	Xpo7	0.83003	0.482191	0.7509	1	23308.7	25707	36703.5	28341.5	21584.8	24129.4	50530.3	49897.3
Q8BFQ8	sp|Q8BFQ8|GALD1_MOUSE	Gatd1	0.79911	0.483606	0.7509	2	68014.1	39355.1	55048.1	67575.6	33375.8	68080.2	92153.6	116611
P37040	sp|P37040|NCPR_MOUSE	Por	1.17969	0.48394	0.7509	2	51620.3	60532.8	67550.1	82339	67755.8	84666.5	44394.9	35235.5
P53668	sp|P53668|LIMK1_MOUSE	Limk1	0.519302	0.484741	0.7509	1	33541.5	1.00591e+06	894054	991595	980853	1.10178e+06	1.04689e+06	363544
Q8K2I1	sp|Q8K2I1|FNTB_MOUSE	Fntb	1.54797	0.485347	0.7509	1	19654.9	7045.7	11970	5775.5	3719.45	2522.96	6581.85	26995.7
Q9D892	sp|Q9D892|ITPA_MOUSE	Itpa	1.71737	0.485451	0.7509	1	5554.92	15361.3	26637.8	69129.5	25149.6	4819.25	4925.55	30258.6
P11798	sp|P11798|KCC2A_MOUSE	Camk2a	0.952819	0.485683	0.7509	14	6.52912e+06	5.77573e+06	7.01171e+06	5.89484e+06	7.34679e+06	5.93418e+06	6.32274e+06	6.86042e+06
Q3TC72	sp|Q3TC72|FAHD2_MOUSE	Fahd2	0.886754	0.487238	0.75517	3	145265	168708	147184	152425	111859	209651	166841	227264
Q9CXW4	sp|Q9CXW4|RL11_MOUSE	Rpl11	1.10528	0.487345	0.755703	2	115415	151680	164789	173956	165035	153882	124174	106627
P62852	sp|P62852|RS25_MOUSE	Rps25	1.14139	0.489823	0.755703	1	43835.7	58776.8	59582.5	71200.9	65332	58551.7	50882.8	33087.7
Q9D5V5	sp|Q9D5V5|CUL5_MOUSE	Cul5	1.17516	0.490128	0.756413	3	115509	112072	186795	173400	137593	128413	167678	74209.1
O70161	sp|O70161|PI51C_MOUSE	Pip5k1c	1.07012	0.490417	0.757368	4	233526	233952	201786	221814	172374	187662	235588	244688
P62264	sp|P62264|RS14_MOUSE	Rps14	2.02888	0.49351	0.757368	1	115932	54394.3	21053.1	25434.7	56355.5	1471.32	50309.4	47772.6
Q60902	sp|Q60902|EP15R_MOUSE	Eps15l1	0.922234	0.493552	0.758791	2	65554.1	43701.9	42120.1	43075.5	50032.2	48372.7	52627	56415.2
P28028	sp|P28028|BRAF_MOUSE	Braf	0.75448	0.493613	0.758791	2	74428.3	22059.3	55225.7	18781.4	40232.6	33593.4	48603	80004.6
P10852	sp|P10852|4F2_MOUSE	Slc3a2	0.961161	0.493646	0.758879	8	1.2649e+06	1.06511e+06	1.12453e+06	1.02832e+06	1.14383e+06	1.17648e+06	1.08351e+06	1.25194e+06
Q8BYM5	sp|Q8BYM5|NLGN3_MOUSE	Nlgn3	1.17735	0.493742	0.758879	1	131798	100445	80220.5	90437.5	48940.6	92159.8	87802.8	126219
Q61768	sp|Q61768|KINH_MOUSE	Kif5b	0.90623	0.495111	0.758879	4	252794	150798	176721	175830	182985	220082	176101	247642
Q93092	sp|Q93092|TALDO_MOUSE	Taldo1	0.887013	0.496286	0.758879	5	256392	209660	181363	189070	329911	201354	169904	263822
P62702	sp|P62702|RS4X_MOUSE	Rps4x	0.932088	0.496372	0.760157	3	138637	169928	185089	192623	179817	186443	155999	212768
Q9CQC9	sp|Q9CQC9|SAR1B_MOUSE	Sar1b	0.851224	0.496557	0.760157	1	49323.4	71486.6	81060.8	78907.4	71922.5	131351	86301.9	52687.9
P26039	sp|P26039|TLN1_MOUSE	Tln1	1.36544	0.497523	0.762965	3	312775	106956	102205	137396	91247	52230.3	103412	274207
Q9D819	sp|Q9D819|IPYR_MOUSE	Ppa1	0.7979	0.49813	0.762965	3	98941	219594	210993	226127	109631	273511	314791	270952
Q5FWK3	sp|Q5FWK3|RHG01_MOUSE	Arhgap1	1.20077	0.498813	0.762965	5	290465	353191	258357	359445	291667	384646	317161	128794
Q6A0A9	sp|Q6A0A9|F120A_MOUSE	FAM120A	1.34785	0.499772	0.764832	2	51567.8	29576.2	39989.2	38524.7	21948.9	39059.5	11299.7	73489.8
Q9R1P3	sp|Q9R1P3|PSB2_MOUSE	Psmb2	1.25932	0.500834	0.764832	1	77914.7	66132.9	39485	52864.8	53085.5	31272.1	27012.1	95367.3
Q9JIF0	sp|Q9JIF0|ANM1_MOUSE	Prmt1	1.17155	0.500992	0.764832	2	122164	83825.7	89564.5	93606.2	109715	67729.5	121071	50657
Q8BGD8	sp|Q8BGD8|COA6_MOUSE	Coa6	0.619066	0.50151	0.764832	1	972.493	9984.86	6465.55	17124.6	5542.47	11020.8	7071.42	16946.7
P24288	sp|P24288|BCAT1_MOUSE	Bcat1	0.737809	0.501667	0.764832	2	28031.6	72166.2	39913.9	67006.9	54483.4	31106.2	61164.4	176133
Q8BTV1	sp|Q8BTV1|TUSC3_MOUSE	Tusc3	0.6787	0.502065	0.766293	1	17946	11327.5	31657.8	55586.2	109514	16390.2	42002.1	22362.2
P31938	sp|P31938|MP2K1_MOUSE	Map2k1	1.18852	0.503461	0.766555	4	391926	355658	361980	280569	407923	149047	301196	387416
Q8R3Q2	sp|Q8R3Q2|PP6R2_MOUSE	Ppp6r2	1.32041	0.503872	0.766555	2	132106	49181.8	175859	45937.4	59056.2	77326.4	39575.6	95544.2
Q9Z1N5	sp|Q9Z1N5|DX39B_MOUSE	Ddx39b	0.907723	0.50585	0.766555	6	687667	492121	410588	541260	548606	630847	466076	686765
P51830	sp|P51830|ADCY9_MOUSE	Adcy9	1.8064	0.507265	0.767387	1	43637.3	52393.7	54582.3	45563.5	2307.77	48955.5	98456.8	48008
Q8C729	sp|Q8C729|F126B_MOUSE	Fam126b	0.886753	0.508803	0.767666	3	122846	102268	126733	114322	160130	84616.9	176538	123066
P49070	sp|P49070|CAMLG_MOUSE	Camlg	0.499936	0.509472	0.768061	1	23585.4	9266.81	29911.5	1813.25	30022.2	9645	4483.95	146152
Q91YR1	sp|Q91YR1|TWF1_MOUSE	Twf1	0.590464	0.509505	0.76888	1	52143.4	54349.8	3012.47	48221.3	53059.6	46645.5	21123.3	64781.1
Q6P2B1	sp|Q6P2B1|TNPO3_MOUSE	Tnpo3	0.556187	0.511132	0.769121	1	42721.3	37676.4	34982.2	1948.46	20462	64280.9	61876.6	14086.8
Q5SUR0	sp|Q5SUR0|PUR4_MOUSE	Pfas	1.13859	0.511461	0.769121	3	110603	105552	116312	103841	70238	108977	72078.4	152072
Q9D1G1	sp|Q9D1G1|RAB1B_MOUSE	Rab1b	1.06912	0.512311	0.769121	1	171401	212677	200261	212385	147477	195797	190067	216228
B9EJ86	sp|B9EJ86|OSBL8_MOUSE	Osbpl8	1.0854	0.512439	0.769121	2	69049.6	62268.9	68915.4	94039.7	64306.8	80336.5	55676	69801.3
Q9D6Y9	sp|Q9D6Y9|GLGB_MOUSE	Gbe1	0.884686	0.513232	0.769121	1	116786	58343	67262.3	65778.6	71504.2	82800.7	78335.4	106110
Q9D6M3	sp|Q9D6M3|GHC1_MOUSE	Slc25a22	0.963545	0.513303	0.770578	5	1.05511e+06	1.10194e+06	1.15215e+06	1.10157e+06	1.23588e+06	1.09879e+06	1.24736e+06	1.01067e+06
Q69ZK9	sp|Q69ZK9|NLGN2_MOUSE	Nlgn2	1.22825	0.513437	0.770578	2	36336.3	19697.4	35218.2	45719.2	28317.1	13467.3	35655.1	37240.1
Q80TY0	sp|Q80TY0|FNBP1_MOUSE	Fnbp1	0.556653	0.513835	0.772946	1	126598	65563.4	9959.46	8633.21	81561.7	75203.7	11509	105292
Q6ZQK5	sp|Q6ZQK5|ACAP2_MOUSE	Acap2	1.4126	0.514222	0.77445	1	4362.38	2974.86	2232.15	4839.24	2160.19	835.186	2412.68	8087.89
Q9DCL9	sp|Q9DCL9|PUR6_MOUSE	Paics	1.05669	0.514231	0.775893	5	164083	194397	168787	194203	177680	192767	172971	141550
P63046	sp|P63046|ST4A1_MOUSE	Sult4a1	1.3563	0.514372	0.775893	1	6100.92	24387.7	34920.9	33941.6	22753.3	13712.2	10876	15358.5
P62881	sp|P62881|GNB5_MOUSE	Gnb5	1.24159	0.514676	0.775893	2	74309.5	122224	89928	82664.8	109150	89069.2	95743.4	30524.5
Q05BC3	sp|Q05BC3|EMAL1_MOUSE	Eml1	0.475766	0.51548	0.775893	1	121890	12937.8	14600.1	14104.2	6050.22	18978.5	304449	181307
Q99P47	sp|Q99P47|CNTP4_MOUSE	Cntnap4	0.70431	0.515546	0.775893	1	9117.49	3120.38	3146.58	5508.58	8049.59	1877.31	13660.7	9707.89
Q91VZ6	sp|Q91VZ6|SMAP1_MOUSE	Smap1	1.22016	0.517461	0.775893	1	139836	88795.3	95799.8	93390.4	111508	94857	38085.8	124416
Q63810	sp|Q63810|CANB1_MOUSE	Ppp3r1	1.17125	0.518236	0.775893	3	174289	280082	291801	299903	245962	160308	356004	161712
P20917	sp|P20917|MAG_MOUSE	Mag	0.943922	0.518304	0.775893	3	228419	173581	173679	184560	200498	175694	199249	228093
Q8C878	sp|Q8C878|UBA3_MOUSE	Uba3	1.49411	0.518819	0.775893	1	13992.9	20261.6	44872.7	45908	37265.1	4617.83	16540.5	41175.3
P18052	sp|P18052|PTPRA_MOUSE	Ptpra	0.740622	0.518971	0.775893	2	34940.9	159197	116407	51080.2	91658.7	145351	160812	51310.5
Q9Z1F9	sp|Q9Z1F9|SAE2_MOUSE	Uba2	0.669674	0.519504	0.775893	2	59831.5	10494.6	139925	54716.7	40962.3	78190.2	62175.1	120034
Q8VHH5	sp|Q8VHH5|AGAP3_MOUSE	Agap3	1.11088	0.519567	0.775893	5	265803	163184	180045	197782	203511	157015	139895	226882
Q8CIE6	sp|Q8CIE6|COPA_MOUSE	Copa	0.915176	0.520584	0.775893	4	363629	299527	278247	231432	254611	308158	322398	395264
Q60597	sp|Q60597|ODO1_MOUSE	Ogdh	0.938091	0.521091	0.775893	18	2.82682e+06	2.12567e+06	2.26031e+06	2.48649e+06	2.25838e+06	2.60726e+06	2.38052e+06	3.11112e+06
P15116	sp|P15116|CADH2_MOUSE	Cdh2	0.635916	0.521602	0.775893	1	16590.8	22996.6	6341.2	21610.4	7311.64	16659.4	21252.7	123502
Q6P5E4	sp|Q6P5E4|UGGG1_MOUSE	Uggt1	1.83433	0.522008	0.775905	1	119886	70338.5	43853.6	41308.5	11238.3	5531.28	149028	145646
O08547	sp|O08547|SC22B_MOUSE	Sec22b	0.776154	0.522739	0.775905	4	138454	178929	118319	185484	220719	421867	214881	74875.8
Q9Z1Q2	sp|Q9Z1Q2|ABHGA_MOUSE	Abhd16a	0.759474	0.524171	0.777407	1	17953.6	26349.2	11087.7	24731.7	25710.4	33300.5	49037.2	9287.08
P15508	sp|P15508|SPTB1_MOUSE	Sptb	1.16942	0.524947	0.777407	1	55807.4	33341	42008.3	36103.6	23829.4	36313.1	28735.1	60685.9
Q9WV60	sp|Q9WV60|GSK3B_MOUSE	Gsk3b	1.19095	0.525072	0.777407	2	120446	157925	110813	146413	145754	166939	113737	55432.5
Q9R0Y5	sp|Q9R0Y5|KAD1_MOUSE	Ak1	1.08005	0.525238	0.777407	4	315226	477545	437904	493007	435620	395616	405008	342169
Q9R0X4	sp|Q9R0X4|ACOT9_MOUSE	Acot9	1.07153	0.525649	0.777407	3	236007	199212	173340	219123	216890	201225	152628	203353
P26231	sp|P26231|CTNA1_MOUSE	Ctnna1	1.62481	0.529082	0.777407	1	45205.8	9840.92	8261.84	6556.27	34947.8	2637.41	3712.82	10103
O55098	sp|O55098|STK10_MOUSE	Stk10	1.21658	0.530802	0.777407	1	31575.4	10360.4	13457.8	17090.1	12973.1	10476.5	11213.8	22535.8
Q9D0L7	sp|Q9D0L7|ARM10_MOUSE	Armc10	1.2914	0.531083	0.778282	2	165015	133216	141763	114631	38112.3	119698	119876	234866
Q80XN0	sp|Q80XN0|BDH_MOUSE	Bdh1	0.958746	0.532275	0.778393	6	944349	964604	944515	983139	987538	1.19931e+06	913139	925693
P62717	sp|P62717|RL18A_MOUSE	Rpl18a	1.18996	0.535725	0.77847	1	59163	40595.6	50810.7	55327.8	65807.1	56300.3	43087.9	21093.9
Q9QXL2	sp|Q9QXL2|KI21A_MOUSE	Kif21a	0.910956	0.535897	0.77847	8	400716	400889	278869	347669	428291	368293	290499	493584
Q9QYJ3	sp|Q9QYJ3|DNJB1_MOUSE	Dnajb1	0.622615	0.53685	0.778916	2	71407.3	12339.1	58504.9	20078.2	34019.6	131511	11646.8	132180
O35344	sp|O35344|IMA4_MOUSE	Kpna3	1.064	0.537144	0.780024	1	57901.9	62461.1	68530.6	51895.8	50493.9	53374.3	53110.8	70114.2
Q9DBP5	sp|Q9DBP5|KCY_MOUSE	Cmpk1	0.906132	0.537204	0.780024	3	346501	307848	196948	337555	333879	268754	381098	307604
Q9R0P3	sp|Q9R0P3|ESTD_MOUSE	Esd	1.11157	0.537293	0.780024	3	127828	150423	87899.1	103792	105740	102508	78497.9	135045
O08585	sp|O08585|CLCA_MOUSE	Clta	1.21113	0.537296	0.780024	3	408821	183224	177701	137902	153654	148913	284920	130862
Q91WS0	sp|Q91WS0|CISD1_MOUSE	Cisd1	0.89953	0.537574	0.780024	2	217262	372023	409399	359891	440603	333418	394068	314197
Q9CXJ4	sp|Q9CXJ4|ABCB8_MOUSE	Abcb8	0.675888	0.539095	0.784471	1	18631.1	12115.1	17057.2	52902.6	8488.91	29009.9	39274.9	100911
Q91ZJ5	sp|Q91ZJ5|UGPA_MOUSE	Ugp2	1.13896	0.539211	0.786142	6	418736	393193	381608	412821	408957	362663	513950	202201
Q8BIZ1	sp|Q8BIZ1|ANS1B_MOUSE	Anks1b	1.13161	0.539238	0.786142	1	44016.4	74294.6	84112.7	73868.5	50852.1	73742.9	45391.1	72794.6
P35235	sp|P35235|PTN11_MOUSE	Ptpn11	1.31273	0.54224	0.787259	2	137946	44382.4	73721.8	73975.7	83700.9	60395.8	104357	21312.8
Q60575	sp|Q60575|KIF1B_MOUSE	Kif1b	0.96612	0.543169	0.789905	2	195222	171732	155845	180851	181634	173252	194491	177213
O88485	sp|O88485|DC1I1_MOUSE	Dync1i1	0.921798	0.543219	0.789905	4	132832	114390	89756.3	127261	125264	110888	107749	160616
P05480	sp|P05480|SRC_MOUSE	Src	0.851992	0.544005	0.789905	3	111587	89437.2	121494	109629	68092.8	211988	114744	152311
Q9CZD3	sp|Q9CZD3|GARS_MOUSE	Gars	0.869653	0.544109	0.789905	2	314744	203369	151549	176906	211638	181938	215453	361647
Q9R1V6	sp|Q9R1V6|ADA22_MOUSE	Adam22	0.904664	0.544536	0.789905	2	872576	682494	632955	665168	524658	801083	936184	951355
Q91XV3	sp|Q91XV3|BASP1_MOUSE	Basp1	0.773799	0.544596	0.789905	7	145787	51046.3	33629.4	38498.3	106981	38523.7	88292.3	73853.6
O55126	sp|O55126|NIPS2_MOUSE	Nipsnap2	0.921238	0.544967	0.789905	3	126754	206373	154197	170355	205108	195548	148222	160477
Q64332	sp|Q64332|SYN2_MOUSE	Syn2	0.927278	0.545041	0.789905	17	3.10054e+06	4.45135e+06	4.70555e+06	4.77427e+06	4.85673e+06	4.93809e+06	4.57829e+06	3.81945e+06
P15864	sp|P15864|H12_MOUSE	Hist1h1c	1.67405	0.545784	0.790414	1	78699.4	107943	69399	56387.2	85381.9	4603.85	175412	61386.7
Q9QUN9	sp|Q9QUN9|DKK3_MOUSE	Dkk3	0.692422	0.546428	0.790414	2	56084.7	48337.4	6471.61	38406.6	70996	30146.1	61917.3	22120.1
P14873	sp|P14873|MAP1B_MOUSE	Map1b	0.949291	0.54693	0.790414	11	490905	473469	631149	545214	526247	507129	584463	631430
P56812	sp|P56812|PDCD5_MOUSE	Pdcd5	0.557378	0.547038	0.792979	1	2142.17	69698.7	55990.5	11057.8	27562.4	31741.8	11689.3	93654.6
P20108	sp|P20108|PRDX3_MOUSE	Prdx3	1.0583	0.547156	0.792979	4	544704	522840	381557	508778	465062	470734	412764	487745
Q91Z67	sp|Q91Z67|SRGP2_MOUSE	Srgap2	1.15618	0.548157	0.792979	3	53074.9	33104.7	56955.4	49591.2	43465.2	32610.6	28630.4	68435.8
Q62277	sp|Q62277|SYPH_MOUSE	Syp	1.19621	0.548485	0.792979	2	543801	1.41005e+06	1.53287e+06	1.27396e+06	1.17326e+06	882794	1.1406e+06	619039
Q8R2U4	sp|Q8R2U4|NTM1A_MOUSE	Ntmt1	0.750669	0.548949	0.792979	1	23858	14053.5	7721.17	11769.8	12677.1	6878.87	32819.6	33527.6
F6ZDS4	sp|F6ZDS4|TPR_MOUSE	Tpr	1.37933	0.550114	0.792979	1	51007.2	54940.3	52419.9	187740	70049.3	94790.9	70407.1	16297.5
Q8R123	sp|Q8R123|FAD1_MOUSE	Flad1	1.48184	0.552013	0.792979	1	20098.2	8449.9	17267.9	12027.7	8314.08	3389.1	5160.78	50304.8
P60879	sp|P60879|SNP25_MOUSE	Snap25	0.878406	0.552696	0.792979	6	191746	169940	140236	161012	217761	133131	304430	140028
Q62418	sp|Q62418|DBNL_MOUSE	Dbnl	0.859486	0.553226	0.792979	4	174343	138152	81919	99094.2	100220	142411	114095	220024
P14131	sp|P14131|RS16_MOUSE	Rps16	1.05483	0.554417	0.792979	4	379431	396838	468407	470229	415723	461094	338453	412911
P47915	sp|P47915|RL29_MOUSE	Rpl29	0.803094	0.554819	0.792979	1	13493.9	7889.58	10090.6	11074.3	17656.5	12247.7	24949.1	5300.84
P19783	sp|P19783|COX41_MOUSE	Cox4i1	1.0493	0.555287	0.792979	2	147581	172515	148779	152816	153463	153008	167118	121683
P35293	sp|P35293|RAB18_MOUSE	Rab18	1.05132	0.556408	0.792979	4	222897	237411	223886	231684	257685	214413	229952	176849
P01831	sp|P01831|THY1_MOUSE	Thy1	1.2795	0.558075	0.792979	2	113984	134594	70166.8	95387.8	45414.6	38089.8	165644	133705
P56380	sp|P56380|AP4A_MOUSE	Nudt2	1.57265	0.55815	0.793628	1	6967.63	17660.8	4805.66	9010.04	1390.57	2792.14	31895.2	7033.86
Q8K2Q7	sp|Q8K2Q7|BROX_MOUSE	Brox	0.878361	0.558553	0.793628	1	31940.1	27812.5	30451	25840.4	43147.1	34168.7	43586.8	18274.6
Q8BG05	sp|Q8BG05|ROA3_MOUSE	Hnrnpa3	1.16366	0.55859	0.793662	1	73873.4	69912.2	72121.6	63704.1	86017.4	56377.3	30901.4	86358.4
Q9QWW1	sp|Q9QWW1|HOME2_MOUSE	Homer2	1.41563	0.560385	0.794707	1	27798.3	31279.2	25683.7	13787.1	5381.59	45530.2	8368.11	37391.5
Q8BU33	sp|Q8BU33|ILVBL_MOUSE	Ilvbl	0.607715	0.560422	0.796811	1	1726.41	34628.5	32899.6	44103.6	31996.3	25323.4	15305.1	51284.3
P08228	sp|P08228|SODC_MOUSE	Sod1	1.15382	0.56167	0.797157	4	716322	465738	532838	378199	513679	252411	595346	491404
Q9QYR9	sp|Q9QYR9|ACOT2_MOUSE	Acot2	1.32251	0.561706	0.797283	2	128864	96788.7	132437	92030.6	104598	182073	112185	23259.3
P16045	sp|P16045|LEG1_MOUSE	Lgals1	1.30233	0.561879	0.798301	1	31409.6	20053.6	25319	22745.7	31448.6	5488.98	32594.6	22412
Q99L04	sp|Q99L04|DHRS1_MOUSE	Dhrs1	0.860863	0.562263	0.798301	2	36229.5	24529.7	54876	33871.9	42851.6	51484.5	24858.8	54842.3
Q8BIG7	sp|Q8BIG7|CMTD1_MOUSE	Comtd1	1.55674	0.562411	0.798336	2	40619.3	15401.3	22135.2	5225.06	11902	3964.33	5060.38	51597.5
P35564	sp|P35564|CALX_MOUSE	Canx	0.745606	0.562449	0.799309	2	52524	78725.1	232598	75204.8	63845.8	116340	335640	93875.4
Q9D710	sp|Q9D710|TMX2_MOUSE	Tmx2	1.17352	0.563025	0.79989	2	37791.1	65936	63312.2	69765.1	51784.6	67957.9	63448.1	25990.8
Q921I1	sp|Q921I1|TRFE_MOUSE	Tf	1.19705	0.564016	0.79989	2	54624.7	32859.5	41750.5	43288.8	46475.2	42327.3	51363.6	15636.7
Q6PE13	sp|Q6PE13|PRRT3_MOUSE	Prrt3	0.881598	0.564496	0.79989	1	82755.6	31396.4	63880.6	58534.7	61048.3	66629.4	65001.7	60829.3
Q9WVJ2	sp|Q9WVJ2|PSD13_MOUSE	Psmd13	1.47349	0.566636	0.79989	2	300335	277930	61293.9	44730.8	79567.2	261433	55059.5	42389.1
Q91VR5	sp|Q91VR5|DDX1_MOUSE	Ddx1	0.831187	0.567823	0.800322	3	280500	114391	91491.2	203759	163183	176010	143625	303796
Q3TFD2	sp|Q3TFD2|PCAT1_MOUSE	Lpcat1	0.926901	0.569413	0.800322	1	12110.7	14273.2	16850.2	10803.2	15217.5	17584	12793.5	12452.8
Q8BJY1	sp|Q8BJY1|PSMD5_MOUSE	Psmd5	1.11986	0.569838	0.800322	8	549277	633125	601957	537079	625782	326002	462372	757862
P61089	sp|P61089|UBE2N_MOUSE	Ube2n	1.07335	0.57019	0.800322	6	465614	547555	502760	545972	563816	458911	572802	355749
Q80T41	sp|Q80T41|GABR2_MOUSE	Gabbr2	1.12403	0.571942	0.800322	3	58334	56785.3	76202.9	92010.4	53029	46664.2	60966.2	96443.3
P49443	sp|P49443|PPM1A_MOUSE	Ppm1a	1.33534	0.574172	0.800322	1	13480.1	34996.2	27708.3	23804.3	20512	25989.7	4938.82	37168.5
Q9R1R2	sp|Q9R1R2|TRIM3_MOUSE	Trim3	0.947163	0.575071	0.800322	2	102974	77861.1	104909	84093	91733.5	91976.3	113815	91521.5
P35980	sp|P35980|RL18_MOUSE	Rpl18	1.32893	0.575714	0.800322	2	1.1188e+06	219842	218448	207079	122648	317659	376467	243212
Q9CZA6	sp|Q9CZA6|NDE1_MOUSE	Nde1	1.59293	0.577798	0.800509	1	52982	32176.7	7257.08	65159.6	48075.5	3465.43	46231.1	16255.6
O08582	sp|O08582|GTPB1_MOUSE	Gtpbp1	0.730989	0.57814	0.801286	2	134345	122342	82277.2	21912.8	177573	90054.6	41553.1	156187
Q62261	sp|Q62261|SPTB2_MOUSE	Sptbn1	0.948994	0.578145	0.801335	50	4.34902e+06	3.86879e+06	3.82e+06	3.65095e+06	4.22231e+06	3.71994e+06	3.58804e+06	5.13379e+06
Q8BMG7	sp|Q8BMG7|RBGPR_MOUSE	Rab3gap2	1.15243	0.57819	0.80374	2	105030	102485	124099	119235	142262	48755.4	112261	115970
Q9WV55	sp|Q9WV55|VAPA_MOUSE	Vapa	1.09522	0.578491	0.804789	2	280287	393421	367946	368922	379513	216951	390248	323776
P28656	sp|P28656|NP1L1_MOUSE	Nap1l1	1.38112	0.579117	0.806239	1	21724.6	96866.4	90055	82770.5	15616.2	84679.1	34846.8	93556.3
Q3UGY8	sp|Q3UGY8|BIG3_MOUSE	Arfgef3	0.699391	0.579875	0.806239	1	34581.8	4005.27	44648.3	45113.7	23409.8	38029.4	26122.4	50140
Q91X97	sp|Q91X97|NCALD_MOUSE	Ncald	0.575799	0.580685	0.806239	1	14046.4	1449.54	62078.4	60345.6	44870.2	36323.4	40067.2	10625.9
Q99J85	sp|Q99J85|NPTXR_MOUSE	Nptxr	1.27988	0.581672	0.808082	1	93666.4	46913	18950.6	63861.2	37110.8	58416.3	18579.1	49203.6
P00920	sp|P00920|CAH2_MOUSE	Ca2	1.05822	0.582077	0.810595	7	387911	563320	535242	555780	439076	510274	451524	512406
P24549	sp|P24549|AL1A1_MOUSE	Aldh1a1	0.543141	0.582698	0.811228	1	72889.1	42284.1	2215.66	2317.8	48846.1	47166.3	7706.67	10243.3
O55026	sp|O55026|ENTP2_MOUSE	Entpd2	0.827631	0.58272	0.811499	1	21731.2	12454.8	9780.47	11536.1	7564.71	14635.5	24392.7	24100.7
O88448	sp|O88448|KLC2_MOUSE	Klc2	1.13642	0.583668	0.8116	2	145487	77012	54580.8	75145.1	84419.3	74738.3	57552.9	75879.3
Q9R1V4	sp|Q9R1V4|ADA11_MOUSE	Adam11	1.62494	0.583672	0.8116	1	45647.9	19606.8	6582.02	30446.2	4522.77	3048.17	61406.2	30388.6
Q8CFI0	sp|Q8CFI0|NED4L_MOUSE	Nedd4l	0.882296	0.583874	0.8116	2	117085	68409.2	59057.6	75362.7	76757.7	85511.3	65495.8	136846
Q80UW2	sp|Q80UW2|FBX2_MOUSE	Fbxo2	0.62207	0.583911	0.8116	1	73614.2	62327.7	56259.3	3003.61	64500.8	58164.3	69657.5	19812.3
Q05920	sp|Q05920|PYC_MOUSE	Pc	1.03419	0.585466	0.8116	17	2.36058e+06	1.91558e+06	1.98198e+06	1.92481e+06	2.08102e+06	1.91374e+06	2.06655e+06	1.83232e+06
Q91YD9	sp|Q91YD9|WASL_MOUSE	Wasl	0.567159	0.587719	0.811846	1	239012	3559.59	5260.66	20491	28585.4	62173.4	31245.7	15961.1
Q80Y14	sp|Q80Y14|GLRX5_MOUSE	Glrx5	1.18688	0.589595	0.812241	1	47839.6	16261	30614.2	30752.5	26019	15757.7	41605.2	21636.4
O35954	sp|O35954|PITM1_MOUSE	Pitpnm1	0.912951	0.589943	0.812241	3	207079	112575	139841	151027	162179	153589	133377	213325
Q99JY8	sp|Q99JY8|PLPP3_MOUSE	Plpp3	0.757257	0.589967	0.812241	1	67444.9	12398.3	77657.5	84494.3	66696.5	63677.9	95995.8	40926.6
P32921	sp|P32921|SYWC_MOUSE	Wars	1.19096	0.59015	0.812241	4	325701	248357	215795	230407	238913	102557	192024	424901
Q3UHD6	sp|Q3UHD6|SNX27_MOUSE	Snx27	0.912155	0.590684	0.812241	2	106422	154947	157085	136171	167673	203417	108639	137505
Q9Z0H8	sp|Q9Z0H8|CLIP2_MOUSE	Clip2	1.35756	0.591004	0.812241	1	20478.3	64481.6	55288.7	44602.2	22137.3	75499.6	59656.2	9615.19
Q8BHN3	sp|Q8BHN3|GANAB_MOUSE	Ganab	0.901987	0.592045	0.812241	3	219842	143067	118413	199211	209313	132472	187035	216131
Q8CGU1	sp|Q8CGU1|CACO1_MOUSE	Calcoco1	1.29436	0.592362	0.812241	2	88241.6	52959.5	71720.4	60512.4	147757	24384.9	79020.9	25378.8
Q9DB77	sp|Q9DB77|QCR2_MOUSE	Uqcrc2	1.04753	0.592491	0.812241	16	1.4529e+06	1.82753e+06	1.64884e+06	1.9049e+06	1.83355e+06	1.6348e+06	1.65137e+06	1.39919e+06
Q9CQA3	sp|Q9CQA3|SDHB_MOUSE	Sdhb	0.935756	0.593043	0.812241	7	339701	500381	525058	375563	495635	493574	402376	444111
Q9R1P1	sp|Q9R1P1|PSB3_MOUSE	Psmb3	0.834899	0.593357	0.813775	1	130454	61409.4	52900.7	33073.1	68440.8	59184	63242.4	112607
Q9Z0Z4	sp|Q9Z0Z4|HEPH_MOUSE	Heph	1.77727	0.594708	0.816277	1	3326.48	1484.98	82271.7	4480.03	2507.75	1439.81	3010.07	16790.3
O88343	sp|O88343|S4A4_MOUSE	Slc4a4	0.786911	0.595178	0.817056	4	42842.2	237039	219960	235286	236930	184222	170281	184417
O35685	sp|O35685|NUDC_MOUSE	Nudc	1.24068	0.595273	0.817056	1	19914.2	18037.4	10956	14130.2	13366	7897.02	6693.01	33220.4
Q02248	sp|Q02248|CTNB1_MOUSE	Ctnnb1	1.08891	0.596385	0.817056	3	285658	158042	179473	173562	169823	171708	155366	220785
P15209	sp|P15209|NTRK2_MOUSE	Ntrk2	1.35021	0.597058	0.817056	1	65905.2	10672	47166.9	42817.5	38512.7	41230.6	30204.3	8911.07
P70414	sp|P70414|NAC1_MOUSE	Slc8a1	0.880129	0.598207	0.817056	2	213876	126660	116383	132158	144145	133555	128469	280764
P84096	sp|P84096|RHOG_MOUSE	Rhog	0.798837	0.598328	0.817056	2	26632.4	35128.2	54616.9	57457.8	114665	55509.5	19974.7	56706.5
Q9D1R9	sp|Q9D1R9|RL34_MOUSE	Rpl34	0.881224	0.598647	0.817171	1	16903.9	7571.57	12316.3	18609.6	16510.3	16280.4	16631.4	10881.7
P49615	sp|P49615|CDK5_MOUSE	Cdk5	1.05935	0.598989	0.817171	5	859650	606668	681278	550924	666605	660601	560167	630085
Q99KI0	sp|Q99KI0|ACON_MOUSE	Aco2	1.02064	0.599767	0.817171	35	1.25878e+07	1.36079e+07	1.46133e+07	1.32234e+07	1.38857e+07	1.28929e+07	1.33914e+07	1.27232e+07
O35250	sp|O35250|EXOC7_MOUSE	Exoc7	0.884937	0.600596	0.817171	1	30218.8	19398.8	30770.5	28479.2	32754	22975.6	22028	50531
Q9EQZ7	sp|Q9EQZ7|RIMS2_MOUSE	Rims2	1.50967	0.601584	0.817171	1	19228.5	61326.7	13593.2	40927.8	7561.58	5071.43	81697.5	40313.6
P56564	sp|P56564|EAA1_MOUSE	Slc1a3	1.15563	0.604058	0.817932	3	1.99823e+06	1.27917e+06	1.10831e+06	1.7365e+06	1.09967e+06	1.04107e+06	951726	2.53151e+06
P38647	sp|P38647|GRP75_MOUSE	Hspa9	0.961214	0.604517	0.817932	15	1.88728e+06	1.69426e+06	1.65385e+06	1.57269e+06	1.53651e+06	1.82654e+06	2.05343e+06	1.69056e+06
Q64737	sp|Q64737|PUR2_MOUSE	Gart	1.16227	0.605265	0.817932	3	50697.7	49774.1	46912	48332.5	36762.8	30432.7	29538.6	94873
Q5M8N0	sp|Q5M8N0|CNRP1_MOUSE	Cnrip1	0.929916	0.60531	0.818836	2	86569.3	88201.6	74012.9	128925	101953	85159.4	115155	97453.1
Q64322	sp|Q64322|NPDC1_MOUSE	Npdc1	0.741373	0.606976	0.819134	1	9220.69	40094.2	9637.82	3880.39	11517.1	9218.82	13842.4	31140.3
P47791	sp|P47791|GSHR_MOUSE	Gsr	0.916612	0.609582	0.819286	1	55627.5	54256.2	51550.4	47296.4	55462.4	83036.5	58867.8	38451.2
Q8QZS1	sp|Q8QZS1|HIBCH_MOUSE	Hibch	0.947447	0.610346	0.819286	2	133357	155919	158117	144606	124402	193897	163659	149459
Q8K2C9	sp|Q8K2C9|HACD3_MOUSE	Hacd3	0.661772	0.611895	0.819286	1	3887.13	69322.5	92602.5	87371.8	57898.1	46992.6	56910.8	73413.2
Q921Q7	sp|Q921Q7|RIN1_MOUSE	Rin1	0.765839	0.613333	0.819286	2	130958	85227.1	21566.2	19901.6	69755.8	59559.5	41084.1	81586
Q9D0M3	sp|Q9D0M3|CY1_MOUSE	Cyc1	1.06882	0.61359	0.819727	6	1.55027e+06	1.59513e+06	1.33514e+06	1.63935e+06	1.49966e+06	1.49421e+06	1.03156e+06	1.79427e+06
P25444	sp|P25444|RS2_MOUSE	Rps2	1.1091	0.615771	0.820237	4	188133	299537	324614	302220	300435	297379	258200	158384
Q9JMD3	sp|Q9JMD3|STA10_MOUSE	Stard10	0.681053	0.615798	0.820964	1	7375.69	21001.4	2002.75	5721.42	20592.5	1909.42	13802.8	15201.3
P14148	sp|P14148|RL7_MOUSE	Rpl7	0.863313	0.616741	0.82355	2	262950	222135	143023	233666	357847	261912	119852	312837
Q9CQW2	sp|Q9CQW2|ARL8B_MOUSE	Arl8b	0.890533	0.617411	0.82355	4	147935	316434	248154	334686	334959	296065	313723	198697
Q8BH66	sp|Q8BH66|ATLA1_MOUSE	Atl1	0.930673	0.62011	0.82355	6	303088	307316	355147	307440	361124	265191	293209	482772
Q99K51	sp|Q99K51|PLST_MOUSE	Pls3	1.24139	0.620152	0.82355	2	50558.8	169461	211105	163497	122155	167316	121478	50152.2
Q2TBE6	sp|Q2TBE6|P4K2A_MOUSE	Pi4k2a	0.604607	0.620666	0.825194	1	25197.5	23508.7	688.306	20079.4	14214.8	5229.29	28778.6	28640
Q9ER00	sp|Q9ER00|STX12_MOUSE	Stx12	0.703324	0.62161	0.828111	1	6090.68	14035.2	31072.7	11795.1	48555.4	49419.7	12195.7	4375.19
P63242	sp|P63242|IF5A1_MOUSE	Eif5a	0.706199	0.622304	0.828524	1	81459.6	96352.7	9251.06	101703	80466.3	73721.5	30960.1	161664
Q80XI4	sp|Q80XI4|PI42B_MOUSE	Pip4k2b	1.22139	0.622624	0.830001	2	121167	64802	40356.9	75085.9	55907.7	52475.9	28225.5	129108
P04925	sp|P04925|PRIO_MOUSE	Prnp	1.07463	0.622674	0.831048	1	7612.17	13205.8	8667.04	9707.83	10434.4	8998.07	7315.73	9233.22
O88843	sp|O88843|CRADD_MOUSE	Cradd	1.2465	0.623182	0.831048	1	7781.49	3242.31	8280.93	4332.27	3628.63	3252.04	2518.35	12616.2
E9QAT4	sp|E9QAT4|SC16A_MOUSE	Sec16a	1.35658	0.625748	0.832785	1	14277.7	2334.69	12566.8	4505.69	5589.5	2298.65	3009.5	14412.9
Q9Z110	sp|Q9Z110|P5CS_MOUSE	Aldh18a1	1.05654	0.625858	0.832785	2	102779	99884.6	127588	106796	88526.9	114992	125849	87624.2
Q99JW2	sp|Q99JW2|ACY1_MOUSE	Acy1	0.906502	0.626207	0.833434	1	40857.9	19505.8	28892.4	25213.4	35055	25012.4	25198.1	38913.9
Q9R0P9	sp|Q9R0P9|UCHL1_MOUSE	Uchl1	1.04401	0.627294	0.833713	7	1.03705e+06	1.29227e+06	1.15982e+06	1.11552e+06	1.22541e+06	1.05306e+06	1.23348e+06	916920
P63280	sp|P63280|UBC9_MOUSE	Ube2i	1.20742	0.627958	0.836161	1	18527	34436.1	35153.5	31471.1	25397	35780.9	9118.55	40077.8
P62821	sp|P62821|RAB1A_MOUSE	Rab1A	0.906532	0.628865	0.836161	3	467783	992310	1.05135e+06	907504	794372	960030	947545	907502
Q8BJ71	sp|Q8BJ71|NUP93_MOUSE	Nup93	1.14365	0.62928	0.836226	1	48729.1	28325.5	40853.1	33254.8	24243.5	20597.5	59007.2	37202
Q9Z1Z2	sp|Q9Z1Z2|STRAP_MOUSE	Strap	0.546598	0.629424	0.836428	1	27528.4	227019	209738	10823.9	13633.9	45692	743381	343212
Q9DC69	sp|Q9DC69|NDUA9_MOUSE	Ndufa9	1.34125	0.631506	0.836428	3	256433	422862	152985	227947	159992	109622	75662.3	880517
P61922	sp|P61922|GABT_MOUSE	Abat	0.961337	0.631944	0.836428	17	1.65869e+06	2.10969e+06	2.11399e+06	2.17531e+06	2.34469e+06	1.9451e+06	1.92932e+06	2.14129e+06
P10649	sp|P10649|GSTM1_MOUSE	Gstm1	1.09321	0.632081	0.836428	7	720856	1.39094e+06	1.27764e+06	1.28898e+06	1.31653e+06	1.03174e+06	999731	851354
Q9JLN9	sp|Q9JLN9|MTOR_MOUSE	Mtor	1.19418	0.633527	0.836486	3	181339	151999	185758	138125	64592.3	101317	162951	326109
Q8VD33	sp|Q8VD33|SGTB_MOUSE	Sgtb	0.591708	0.635752	0.838671	1	29224.3	687.155	12266.8	14613.1	2115.42	27313.2	38763.6	13111.3
Q9Z2U0	sp|Q9Z2U0|PSA7_MOUSE	Psma7	0.896969	0.636329	0.838671	6	470666	419196	410660	352438	378157	420744	844951	328144
Q61137	sp|Q61137|ASTN1_MOUSE	Astn1	1.14736	0.638031	0.838671	1	86070.1	35340.9	41660.4	38468.1	28994.3	47031.7	31610.7	65255.3
P80314	sp|P80314|TCPB_MOUSE	Cct2	1.0744	0.639075	0.839501	13	710773	839927	607526	944807	801402	520069	732436	842422
Q501J6	sp|Q501J6|DDX17_MOUSE	Ddx17	1.04733	0.64018	0.839765	3	240983	203420	229230	211675	189966	253959	233025	175853
Q61425	sp|Q61425|HCDH_MOUSE	Hadh	0.93253	0.640861	0.839854	3	174762	141270	114772	127702	127333	154943	122319	198276
Q2M3X8	sp|Q2M3X8|PHAR1_MOUSE	Phactr1	0.834471	0.640926	0.839854	2	85339.9	81500.2	24380	94628.3	49964.4	76469.3	70939.8	122091
Q99KQ4	sp|Q99KQ4|NAMPT_MOUSE	Nampt	1.05874	0.641303	0.839854	1	54256.8	52556.5	55580.4	41861.8	44184.8	58623.8	53472.7	38123.3
Q3UMR5	sp|Q3UMR5|MCU_MOUSE	Mcu	1.2256	0.641345	0.841528	2	33200.2	13028.1	9452.12	28270.7	8659.53	10884.1	17319.1	31382.1
P07901	sp|P07901|HS90A_MOUSE	Hsp90aa1	1.09427	0.641965	0.841528	20	3.81936e+06	5.00333e+06	2.81069e+06	4.30958e+06	5.18559e+06	3.27332e+06	2.69082e+06	3.53454e+06
Q0VE82	sp|Q0VE82|CPNE7_MOUSE	Cpne7	0.719354	0.642057	0.841528	1	43420.3	7906.47	42989.2	44507.5	63784	70966.4	65167.7	8315.74
Q9CR09	sp|Q9CR09|UFC1_MOUSE	Ufc1	0.889427	0.642236	0.84283	1	38578.7	38444.3	49573.5	50015.7	68471.8	42833.8	72937.5	27469.2
Q80WG5	sp|Q80WG5|LRC8A_MOUSE	Lrrc8a	1.13863	0.642268	0.845165	1	54849.3	35942.4	18664.4	37119.9	22792.7	37577	24121.5	39331.9
P10711	sp|P10711|TCEA1_MOUSE	Tcea1	0.799245	0.643118	0.845307	1	17439.1	84741.2	110884	88752.9	101356	76011.4	97181	47604.2
Q8R4N0	sp|Q8R4N0|CLYBL_MOUSE	Clybl	0.891227	0.643307	0.846327	1	35445.5	21801.1	28732.2	28860	38448.4	31089.3	48034.1	17689.3
Q8BLF1	sp|Q8BLF1|NCEH1_MOUSE	Nceh1	1.09096	0.644327	0.846327	3	120338	170334	195420	195156	165696	149153	208276	107209
O70172	sp|O70172|PI42A_MOUSE	Pip4k2a	0.932115	0.645686	0.846327	3	227077	132176	137380	155972	142139	160653	186117	200461
Q9D6F9	sp|Q9D6F9|TBB4A_MOUSE	Tubb4a	1.13355	0.646215	0.846327	8	1.12239e+07	7.1821e+06	4.56425e+06	9.04514e+06	6.36117e+06	5.8177e+06	4.94262e+06	1.10198e+07
Q9CQ26	sp|Q9CQ26|STABP_MOUSE	Stambp	0.736548	0.646533	0.846327	1	236188	194586	23605.1	159117	235589	195896	56003.4	226930
Q69ZP3	sp|Q69ZP3|PNKD_MOUSE	Pnkd	1.67605	0.64742	0.846327	1	84132.6	3706.46	12998.5	17839.7	69483.1	2450.29	24712.3	2177.93
P62774	sp|P62774|MTPN_MOUSE	Mtpn	1.42314	0.647495	0.846327	1	9343.96	60201.5	84663.2	79715.1	21369.7	55028	8801.71	89421.1
P54830	sp|P54830|PTN5_MOUSE	Ptpn5	1.08618	0.647937	0.846327	2	151348	72758.3	86857	121408	106911	87281.9	88252.2	101304
Q9CZU6	sp|Q9CZU6|CISY_MOUSE	Cs	0.972723	0.648412	0.846327	13	3.41214e+06	3.94721e+06	3.63993e+06	3.77101e+06	3.92201e+06	4.07889e+06	3.93198e+06	3.28284e+06
Q8BLQ9	sp|Q8BLQ9|CADM2_MOUSE	Cadm2	0.703114	0.650042	0.846327	1	66429.6	12688.3	11471.5	12823.2	17530.3	34093.7	6905.26	122924
Q9EQK5	sp|Q9EQK5|MVP_MOUSE	Mvp	1.33143	0.650663	0.846327	1	226442	37502.2	173002	256729	36814.2	124252	100716	260524
P29341	sp|P29341|PABP1_MOUSE	Pabpc1	0.93033	0.650748	0.846457	7	424073	305688	358878	344919	470936	266797	360859	472448
Q80VQ1	sp|Q80VQ1|LRRC1_MOUSE	Lrrc1	0.616791	0.651238	0.846457	1	92580.8	19333.6	12932.1	41463.6	44222.4	10267.5	21240.4	687612
P55012	sp|P55012|S12A2_MOUSE	Slc12a2	1.1629	0.651267	0.847179	2	133771	127608	119269	120953	204625	49168.2	86901.4	154006
Q60692	sp|Q60692|PSB6_MOUSE	Psmb6	1.13012	0.653739	0.848208	2	58386.9	65518	68137.1	68504.6	80886.3	62661.8	79466.7	27178.1
Q8BW75	sp|Q8BW75|AOFB_MOUSE	Maob	1.2123	0.653892	0.848208	2	78002.7	64025	30455	68979.5	20289.5	36238.8	66091	99956
Q6PAR5	sp|Q6PAR5|GAPD1_MOUSE	Gapvd1	1.08443	0.65507	0.848208	3	140141	107428	109221	86083.8	85278.9	102254	78996.1	148585
Q78JE5	sp|Q78JE5|FBX22_MOUSE	Fbxo22	0.759587	0.655518	0.848208	1	41537.6	21261.6	3807.51	13105.1	13008.4	12021	19106.5	44305.6
Q64433	sp|Q64433|CH10_MOUSE	Hspe1	1.24773	0.656164	0.848208	2	68308.6	96359.8	83562.1	74256.6	49543.9	60895.8	228519	24442
Q6KAR6	sp|Q6KAR6|EXOC3_MOUSE	Exoc3	1.0786	0.656791	0.848208	2	60910.2	70083	116347	84477.1	82884.9	60345.7	86517.1	71636.8
O35598	sp|O35598|ADA10_MOUSE	Adam10	0.783226	0.657212	0.848213	1	11785	31288.9	28463.1	3596.71	21369.3	13841.1	13830.8	24521.7
Q922S4	sp|Q922S4|PDE2A_MOUSE	Pde2a	0.949741	0.657763	0.848864	9	1.3656e+06	1.01282e+06	1.15788e+06	860516	1.15106e+06	1.25048e+06	1.19231e+06	986949
O35737	sp|O35737|HNRH1_MOUSE	Hnrnph1	1.13351	0.657864	0.848864	5	415760	311341	230567	329943	328464	279598	144152	450574
P54822	sp|P54822|PUR8_MOUSE	Adsl	1.1639	0.658003	0.848864	1	27856.1	33058	32164.3	30407	40041.3	27786.7	42261.7	10437.5
Q99020	sp|Q99020|ROAA_MOUSE	Hnrnpab	0.829854	0.659345	0.848864	2	25831.4	76410.9	77954.2	86939.1	114298	33657.6	109074	67221.4
Q8BVQ5	sp|Q8BVQ5|PPME1_MOUSE	Ppme1	1.15428	0.660375	0.848864	4	525081	492527	521138	482371	362838	286929	1.096e+06	320952
P26883	sp|P26883|FKB1A_MOUSE	Fkbp1a	0.932882	0.661309	0.851053	2	144735	239261	183573	234949	254986	212666	163374	222599
Q8JZW4	sp|Q8JZW4|CPNE5_MOUSE	Cpne5	0.971113	0.663643	0.851053	3	450363	364656	385526	393171	373604	429213	384456	454015
Q9D1M0	sp|Q9D1M0|SEC13_MOUSE	Sec13	1.35884	0.666039	0.851478	1	29705.5	30499	30592.5	7969.33	27880.1	45199.6	16907.4	3040.7
Q6PD03	sp|Q6PD03|2A5A_MOUSE	Ppp2r5a	0.819949	0.666162	0.851478	1	11798.1	67470.9	52363	63821.3	64727.3	61071.5	40626	36647.3
P46935	sp|P46935|NEDD4_MOUSE	Nedd4	1.15594	0.66639	0.851478	2	44044.8	65278.8	125625	78088.4	61140.5	82950.2	32964.7	94491.2
P62900	sp|P62900|RL31_MOUSE	Rpl31	0.772215	0.666996	0.851478	1	20073.5	10911.9	53333.1	41625.1	17679.5	20982.2	29619.9	124457
P14211	sp|P14211|CALR_MOUSE	Calr	1.11309	0.668247	0.851478	4	82574.9	158543	174683	132625	134349	71732.9	152269	134644
Q8BWT1	sp|Q8BWT1|THIM_MOUSE	Acaa2	0.950277	0.669305	0.851478	5	473739	358674	322115	393750	455356	347783	356111	468624
Q9D074	sp|Q9D074|MGRN1_MOUSE	Mgrn1	0.637763	0.669859	0.851478	1	597.884	9803.64	18653.4	7942.67	29406.5	23428	3496.85	2178.9
Q9DC70	sp|Q9DC70|NDUS7_MOUSE	Ndufs7	1.02696	0.672473	0.851478	2	165026	184303	201423	210277	178610	175095	197325	187676
P18242	sp|P18242|CATD_MOUSE	Ctsd	1.12382	0.673402	0.852601	2	148589	184587	198666	155420	171020	183389	233016	72649.7
Q6ZWR6	sp|Q6ZWR6|SYNE1_MOUSE	Syne1	0.916444	0.674869	0.85332	1	57992.4	56863.9	37957.7	52524.5	62198.4	45289.9	39117.4	84585
P12815	sp|P12815|PDCD6_MOUSE	Pdcd6	1.2668	0.675685	0.853914	1	80059.5	97008.5	60742.8	69009.2	96661.2	86237.4	122328	12397
Q91W43	sp|Q91W43|GCSP_MOUSE	Gldc	1.28732	0.675707	0.856313	1	2056.39	7110.94	19639.2	2453.1	3520.53	3897.22	2449.68	7632.13
Q61035	sp|Q61035|SYHC_MOUSE	Hars	0.900013	0.676226	0.858013	4	167003	155985	158496	172871	119411	158478	361338	159084
Q6P9S0	sp|Q6P9S0|MTSS2_MOUSE	Mtss2	1.19742	0.676408	0.858013	1	707.726	1069.86	1486.48	2129.85	1333.45	440.366	911.384	2178.8
Q8BSL7	sp|Q8BSL7|ARF2_MOUSE	Arf2	1.09198	0.676813	0.858013	1	51636.9	71593.3	121294	87814.5	84403.8	63477.4	60622.2	85265.3
O70133	sp|O70133|DHX9_MOUSE	Dhx9	1.2721	0.677124	0.85818	1	34306.8	11886.9	21842.3	26994.9	3889.66	31840.1	25999.4	28516.1
E9Q6P5	sp|E9Q6P5|TTC7B_MOUSE	Ttc7b	1.0587	0.677696	0.859175	3	97478.2	141360	138736	127899	126617	97220.1	150774	104864
Q3TEA8	sp|Q3TEA8|HP1B3_MOUSE	Hp1bp3	1.0611	0.678986	0.859921	2	201261	152701	151048	159824	144996	170082	116510	203681
Q8BTZ5	sp|Q8BTZ5|ANR46_MOUSE	Ankrd46	1.4481	0.68001	0.860019	1	19480.8	17173.1	297400	264749	49170	19646.8	73244.2	84658.8
Q9ERS2	sp|Q9ERS2|NDUAD_MOUSE	Ndufa13	1.14973	0.680344	0.862759	1	105736	190420	237233	228134	79504.2	286287	166736	164323
Q9D3A9	sp|Q9D3A9|TTYH1_MOUSE	Ttyh1	1.10732	0.681828	0.863337	2	239808	105047	133163	104500	131009	97325.8	103999	175835
Q11136	sp|Q11136|PEPD_MOUSE	Pepd	0.960545	0.683535	0.863801	1	16496	16051.4	15638.1	14993.8	19557.3	17289.1	12682.8	17006.6
Q8BGC4	sp|Q8BGC4|PTGR3_MOUSE	Zadh2	1.30703	0.683974	0.863801	1	46371.9	33671.7	30878.8	40067.6	37012.4	25797.9	5855.94	118386
Q9JKR6	sp|Q9JKR6|HYOU1_MOUSE	Hyou1	1.16259	0.685142	0.863801	1	10105	9576.12	4810.27	12012.6	5664.32	7464.36	4341.27	16675
Q99PU8	sp|Q99PU8|DHX30_MOUSE	Dhx30	1.32285	0.686075	0.863801	1	123452	38342.9	14314.1	72206.1	97482.4	15912.1	64143.1	16057.4
P28663	sp|P28663|SNAB_MOUSE	Napb	0.928969	0.686386	0.863801	10	469752	766858	693800	770500	725343	532259	675055	992156
Q9D8P4	sp|Q9D8P4|RM17_MOUSE	Mrpl17	1.19085	0.686541	0.863801	1	14181	25417	21758.9	22234	5462.89	29278	19436.6	27891.6
Q9CPW4	sp|Q9CPW4|ARPC5_MOUSE	Arpc5	1.10354	0.688661	0.863801	1	34910	76618.8	97948.8	58923.7	66564.1	50142.5	63255.9	49303.2
Q80ZF8	sp|Q80ZF8|AGRB3_MOUSE	Adgrb3	0.814298	0.689823	0.863918	1	1248.55	6478.09	2633.87	815.003	1723.99	4096.82	2566.21	2178.71
Q9CZ04	sp|Q9CZ04|CSN7A_MOUSE	Cops7a	1.18012	0.691749	0.86495	3	68041.7	130550	25932.3	56403.6	51388.7	45029	31826.1	90958.6
P68372	sp|P68372|TBB4B_MOUSE	Tubb4b	0.869975	0.692017	0.865455	1	1.2666e+06	899536	620844	315675	712487	559057	840129	1.16486e+06
Q01065	sp|Q01065|PDE1B_MOUSE	Pde1b	1.04714	0.693246	0.865455	7	309762	293878	382357	471264	364054	350671	324156	329676
Q99M51	sp|Q99M51|NCK1_MOUSE	Nck1	0.764717	0.694279	0.866731	1	31222	3232.03	36837.2	32608.5	10850	40275.8	29925.7	27104.1
Q9CPW2	sp|Q9CPW2|FDX2_MOUSE	Fdx2	0.736575	0.695202	0.868232	1	156351	48538.8	18660.9	23150.6	75998.9	35132.1	243648	17121.7
P43277	sp|P43277|H13_MOUSE	Hist1h1d	0.928946	0.695638	0.868232	2	169794	119276	80251.7	121753	164200	129079	105637	118686
P70704	sp|P70704|AT8A1_MOUSE	Atp8a1	1.02707	0.696079	0.86904	11	1.00498e+06	1.13858e+06	1.05198e+06	1.17942e+06	1.18873e+06	1.05033e+06	1.10935e+06	921107
Q9Z1Q9	sp|Q9Z1Q9|SYVC_MOUSE	Vars	1.09852	0.696384	0.86904	1	17712.3	11598.7	8345.4	14149.9	10027.2	8940.82	18503.6	10042.4
A2AG50	sp|A2AG50|MA7D2_MOUSE	Map7d2	0.897044	0.697011	0.86904	1	15802.3	8975.11	9922.47	6564.7	11727.3	18336.5	7704.95	8611.06
P42859	sp|P42859|HD_MOUSE	Htt	0.697237	0.697144	0.86904	1	65110.4	53648.1	77475.6	7896.65	36107.4	66374.6	11296.7	333995
Q8R2R9	sp|Q8R2R9|AP3M2_MOUSE	Ap3m2	0.981624	0.699755	0.871111	3	209560	213277	181418	211210	210105	198947	221207	199477
O55013	sp|O55013|TPPC3_MOUSE	Trappc3	1.02597	0.699967	0.871967	1	68239.9	67372.2	62065.9	65484.7	59982	70899.8	70841.9	55977.6
P62743	sp|P62743|AP2S1_MOUSE	Ap2s1	0.965593	0.700164	0.873514	3	772524	744336	648872	845730	891425	769974	648803	815120
Q9JKY5	sp|Q9JKY5|HIP1R_MOUSE	Hip1r	1.12187	0.700348	0.873514	4	397019	220226	238978	218620	111547	277980	283353	328214
Q62433	sp|Q62433|NDRG1_MOUSE	Ndrg1	0.947037	0.700439	0.874452	1	50646.4	37581.8	35798.8	30150.7	31439.6	42323.3	44592.5	43043.4
P84104	sp|P84104|SRSF3_MOUSE	Srsf3	0.6811	0.700634	0.875076	1	106917	6601.08	72033.7	9117.3	29070.4	7350.98	73004.3	138062
Q8BNY6	sp|Q8BNY6|NCS1_MOUSE	Ncs1	1.14091	0.700969	0.875076	1	14048.1	16250	18544.4	13733.1	5629.17	13117.9	23949.8	19401.4
Q8R361	sp|Q8R361|RFIP5_MOUSE	Rab11fip5	1.30929	0.701644	0.875076	1	68733.1	59547.4	13061	37643.6	5519.56	42611.8	47794.2	60916.7
Q9WUP7	sp|Q9WUP7|UCHL5_MOUSE	Uchl5	0.75213	0.704174	0.875076	1	9251.32	13322.3	21713.9	153010	43589.6	11947.2	45970.7	53449.3
Q7TMM9	sp|Q7TMM9|TBB2A_MOUSE	Tubb2a	0.964097	0.704495	0.875076	7	5.14166e+06	5.51195e+06	4.67513e+06	5.85109e+06	5.39651e+06	5.51293e+06	4.53593e+06	6.6496e+06
Q9DB60	sp|Q9DB60|PGFS_MOUSE	Prxl2b	0.910827	0.70455	0.875076	1	34704.6	69558	83423.1	76459.3	65198.3	92736.5	72089.4	51327.4
Q03137	sp|Q03137|EPHA4_MOUSE	Epha4	1.06632	0.705395	0.875076	2	33875.1	34145	29493.4	45600.3	44741.9	31854.9	23567	35822.7
Q8BFT9	sp|Q8BFT9|SVOP_MOUSE	Svop	0.871576	0.707345	0.875604	1	42513.6	27819.6	42326.6	27864.1	60690.2	51443.7	14871.9	52059.2
Q7TQ95	sp|Q7TQ95|LNP_MOUSE	Lnpk	0.646367	0.708296	0.875604	1	126045	8281.24	8176.76	5880.64	2469.83	63863.9	16018.1	113809
P60761	sp|P60761|NEUG_MOUSE	Nrgn	0.741041	0.71014	0.875604	1	7600.23	13219.7	610.626	15356.5	11854.5	7046.23	7014.86	5331.99
Q9CQU0	sp|Q9CQU0|TXD12_MOUSE	Txndc12	0.70647	0.710341	0.875604	1	315501	25968.6	40422.5	27592.4	24971.6	105998	453169	30583.1
Q61701	sp|Q61701|ELAV4_MOUSE	Elavl4	1.10613	0.710576	0.875604	1	15792.4	25303.7	33153.6	20107.3	32691.3	24501.6	17503.5	12692.5
Q05816	sp|Q05816|FABP5_MOUSE	Fabp5	0.913366	0.711106	0.875604	1	148815	60267.1	61178.7	78413.2	68306.7	102808	84991.8	103578
P28650	sp|P28650|PURA1_MOUSE	Adssl1	1.1211	0.711386	0.875604	3	85963.7	130624	132728	112976	100196	163410	46921.6	138743
Q80Z38	sp|Q80Z38|SHAN2_MOUSE	Shank2	0.830672	0.711641	0.875838	1	46411.2	29461.2	10045.6	24816.9	22575.9	23797.6	16280.3	81853.2
Q921F4	sp|Q921F4|HNRLL_MOUSE	Hnrnpll	0.835309	0.712044	0.87764	2	54408.1	15392	11870.3	50522.1	25259	17875.7	49516.8	46140.7
Q9D4H8	sp|Q9D4H8|CUL2_MOUSE	Cul2	1.28381	0.712298	0.87764	1	83083.4	68498.9	11378.5	70770.1	56403.9	52359.7	9544.15	59853.9
Q9CYR6	sp|Q9CYR6|AGM1_MOUSE	Pgm3	0.799685	0.71256	0.87764	1	53158.6	39758	6332.4	37227	15051.7	47429	62943.4	27112.5
P16858	sp|P16858|G3P_MOUSE	Gapdh	1.05688	0.713521	0.878086	26	1.67372e+07	2.6867e+07	2.58934e+07	2.64027e+07	2.47477e+07	2.27219e+07	2.53239e+07	1.73033e+07
Q9CRY7	sp|Q9CRY7|GDPD1_MOUSE	Gdpd1	0.945587	0.714018	0.879862	1	54998.6	56785.1	40454.2	36403.3	39629.5	57785.2	44016.6	57073.1
Q7TT50	sp|Q7TT50|MRCKB_MOUSE	Cdc42bpb	1.27689	0.714118	0.879862	1	49250.1	5855.51	35344	33248.3	6307.76	46582.8	24722.9	17548.9
Q68FE6	sp|Q68FE6|RIPR1_MOUSE	Ripor1	1.16053	0.714154	0.879862	1	31562	30648	26252.1	20170.9	17212.6	9183.52	45293.9	39440.2
P21447	sp|P21447|MDR1A_MOUSE	Abcb1a	0.784756	0.714951	0.879862	1	6668.21	14762.1	32872.7	29143.5	4972.97	40864.4	26229.9	46648.6
Q3U5Q7	sp|Q3U5Q7|CMPK2_MOUSE	Cmpk2	0.71367	0.715181	0.879862	1	5281.4	8779.79	31365.5	32390.7	44999	34494.2	53479.9	2187.64
Q8BJI1	sp|Q8BJI1|S6A17_MOUSE	Slc6a17	1.06254	0.716114	0.879862	1	108944	85157.4	107716	80480.6	67567.6	100179	75069.4	124174
Q91YM2	sp|Q91YM2|RHG35_MOUSE	Arhgap35	0.775408	0.716454	0.879862	2	199195	97168.7	94911.3	91027.4	37769	70877.6	647412	266900
Q6IRU5	sp|Q6IRU5|CLCB_MOUSE	Cltb	1.11713	0.717439	0.879862	3	173188	126153	215582	104256	178293	124689	205369	69058.2
P56135	sp|P56135|ATPK_MOUSE	Atp5mf	0.975341	0.718296	0.879862	2	612644	628102	628418	675326	580727	604949	769448	667583
Q61361	sp|Q61361|PGCB_MOUSE	Bcan	0.925723	0.718315	0.879862	5	316764	215608	147910	222713	177173	286867	199589	301999
O88545	sp|O88545|CSN6_MOUSE	Cops6	0.952431	0.718464	0.879862	3	121759	132873	163869	122763	181793	111957	155579	124908
Q9D554	sp|Q9D554|SF3A3_MOUSE	Sf3a3	0.805574	0.720505	0.879862	1	7877.4	3779.48	6597.94	33076.1	8582.3	4760.45	21249.9	17770.8
Q9CR57	sp|Q9CR57|RL14_MOUSE	Rpl14	0.964288	0.720675	0.879862	4	270906	233384	198359	231881	203272	243001	234602	290242
F8VPU2	sp|F8VPU2|FARP1_MOUSE	Farp1	1.05304	0.720873	0.879862	1	18186.1	25977	24160.1	21215.8	24770.7	22869.8	23103.5	15046.5
Q8R4U7	sp|Q8R4U7|LUZP1_MOUSE	Luzp1	0.738811	0.721984	0.879862	1	100839	38850.2	37552.2	6402.55	19310.9	135610	13149.5	91807.5
Q9D1Q6	sp|Q9D1Q6|ERP44_MOUSE	Erp44	0.584078	0.72199	0.879922	1	3804.16	17744.3	192584	176096	205221	168769	218984	2593.45
Q8R0Y8	sp|Q8R0Y8|S2542_MOUSE	Slc25a42	0.840044	0.722901	0.879922	1	802.243	4966.86	4181.98	5786.91	3942.32	3087.96	4763.21	3339.54
Q921E2	sp|Q921E2|RAB31_MOUSE	Rab31	0.781771	0.725781	0.880285	1	78204.5	44566.3	21689.7	5062.68	18848.3	63677	45869.2	18611.4
Q8BL66	sp|Q8BL66|EEA1_MOUSE	Eea1	0.885096	0.726511	0.880285	6	153034	414079	138893	125719	135545	216134	185653	331501
Q9D023	sp|Q9D023|MPC2_MOUSE	Mpc2	0.911496	0.727068	0.880351	2	51141.9	83338.6	34072.8	79504.5	48748	93785.8	65779.7	55618.2
P60670	sp|P60670|NPL4_MOUSE	Nploc4	1.17206	0.727275	0.880351	1	56053.7	21044.3	18677.7	21720.9	16482.4	30830.3	10001.1	49900.2
Q8BIJ6	sp|Q8BIJ6|SYIM_MOUSE	Iars2	1.2081	0.727577	0.880351	1	17810.9	65172.8	71732.2	60919.2	63422.4	56399.2	56165.3	11852.8
Q5SXY1	sp|Q5SXY1|CYTSB_MOUSE	Specc1	0.707181	0.728875	0.880351	1	84018.7	7315.43	5319.23	41569	7945.1	10413.8	44059.7	149060
P14824	sp|P14824|ANXA6_MOUSE	Anxa6	1.10192	0.730798	0.881502	10	1.19973e+06	653299	567188	704649	507279	578594	564896	1.28147e+06
Q8BMZ5	sp|Q8BMZ5|SEN34_MOUSE	Tsen34	1.35037	0.731597	0.881502	1	1548.96	8515.68	10493.8	7150.09	2084.24	835.698	8246.14	20722.7
Q8R3B1	sp|Q8R3B1|PLCD1_MOUSE	Plcd1	0.878632	0.732051	0.881502	1	69842.5	23363	23077.8	17296.8	27247.6	28774	24725.6	56378.1
Q9Z0R4	sp|Q9Z0R4|ITSN1_MOUSE	Itsn1	0.837717	0.732461	0.88167	3	62656.5	100131	93734.3	102459	140558	105552	286869	28746.7
Q8C078	sp|Q8C078|KKCC2_MOUSE	Camkk2	1.27203	0.732814	0.88167	1	36576.5	40462.8	45078.6	11439.7	14603.4	28762.8	6503.43	106714
Q9CZN4	sp|Q9CZN4|SHSA9_MOUSE	Shisa9	0.852609	0.733597	0.882184	1	5965.25	18304.7	4712.19	19904.5	22050.8	6624.93	11183.4	11862.8
Q91WC3	sp|Q91WC3|ACSL6_MOUSE	Acsl6	1.03318	0.734214	0.884891	12	840383	1.16124e+06	1.0942e+06	1.11997e+06	1.15231e+06	1.06179e+06	909474	943170
Q61792	sp|Q61792|LASP1_MOUSE	Lasp1	1.05831	0.734222	0.884891	2	178446	99950.8	141398	111412	145064	93919	125380	131123
P26638	sp|P26638|SYSC_MOUSE	Sars	0.943601	0.734631	0.884891	4	448380	275940	320493	311080	359296	475605	354710	256700
Q8CC88	sp|Q8CC88|VWA8_MOUSE	Vwa8	1.09729	0.73465	0.884891	2	97687.3	71150.1	92633.9	51910	69184.6	37739.5	102013	86555.1
Q8R3P0	sp|Q8R3P0|ACY2_MOUSE	Aspa	1.15886	0.734873	0.884891	2	110163	106784	93491.7	103643	209014	112291	93446.2	28817.1
P62141	sp|P62141|PP1B_MOUSE	Ppp1cb	1.09291	0.737033	0.885871	4	174174	258762	100378	254608	231649	151708	131876	174201
O70435	sp|O70435|PSA3_MOUSE	Psma3	0.870232	0.737507	0.886576	2	54895.9	124227	27505.7	121938	55355.1	94707.4	112951	67351.4
Q61206	sp|Q61206|PA1B2_MOUSE	Pafah1b2	0.941332	0.738471	0.886576	2	352756	254723	185838	255670	243321	276714	218811	369069
Q9QUR6	sp|Q9QUR6|PPCE_MOUSE	Prep	1.08493	0.73971	0.886576	2	62435.2	47235.5	57046.5	83870.1	35613	53551.4	56170.6	95067.8
Q8BX70	sp|Q8BX70|VP13C_MOUSE	Vps13c	1.15009	0.739767	0.886576	2	45555.7	49241	56499.4	36157.8	13208.6	53069.6	45811.7	81565.5
P62484	sp|P62484|ABI2_MOUSE	Abi2	1.21725	0.740093	0.886576	1	28807.9	53659.4	51182.8	48494	7050.58	61844.9	65406	61278.5
Q8VI75	sp|Q8VI75|IPO4_MOUSE	Ipo4	0.807356	0.740391	0.886576	1	1980.08	5067.29	11871.1	12031.4	9252.39	2103.86	10985.3	15773.2
O35295	sp|O35295|PURB_MOUSE	Purb	1.16577	0.740626	0.886576	1	79145.3	36834.8	21442.3	35275.2	35071.2	15108.8	27471	82020.6
Q9R1P4	sp|Q9R1P4|PSA1_MOUSE	Psma1	1.04088	0.740895	0.886576	2	163011	112892	105992	135605	126662	106140	142974	117231
Q9JI90	sp|Q9JI90|RNF14_MOUSE	Rnf14	1.34632	0.741071	0.886576	1	75100.6	33456.9	2448.37	58046	31151.7	10392	9530.82	35226.9
Q6ZWV3	sp|Q6ZWV3|RL10_MOUSE	Rpl10	1.22135	0.741714	0.886576	1	18679.5	63822.6	8955.68	71806.4	46234.2	25595.4	25813	11279.3
Q9CZM2	sp|Q9CZM2|RL15_MOUSE	Rpl15	1.09389	0.743128	0.886576	2	82995.3	58573.8	56277.9	58332.9	71231	66486.7	83732.9	28106.6
P59823	sp|P59823|IRPL1_MOUSE	Il1rapl1	0.805131	0.743333	0.8881	1	47458.3	56616.8	10293.9	18063.7	68508.7	11388.3	18504.3	82357.5
Q8C0L0	sp|Q8C0L0|TMX4_MOUSE	Tmx4	1.17103	0.74457	0.8881	1	26276.6	24602.6	25502.7	27024.4	28972.2	30992.3	46220.8	5708.89
P60122	sp|P60122|RUVB1_MOUSE	Ruvbl1	1.14822	0.745131	0.8881	2	77305.7	18165.5	38653	42314.7	15918.3	42580.9	33384.6	58394.3
P62631	sp|P62631|EF1A2_MOUSE	Eef1a2	0.879133	0.745206	0.8881	5	634325	835307	219960	990400	959114	506190	485253	820240
Q5XJY5	sp|Q5XJY5|COPD_MOUSE	Arcn1	1.15497	0.746306	0.8881	2	134022	62705.5	75510.9	56645.2	27215.9	70949.2	60445.3	173079
P70349	sp|P70349|HINT1_MOUSE	Hint1	0.957915	0.74644	0.8881	1	110308	100955	131646	126877	119230	105447	167988	104597
Q7TT37	sp|Q7TT37|ELP1_MOUSE	Elp1	1.11252	0.746916	0.8881	1	18995.7	72738.8	25942.8	25057.4	21364.6	34443.6	32216.1	24732.2
Q8K354	sp|Q8K354|CBR3_MOUSE	Cbr3	1.22169	0.747843	0.8881	1	27359	9119.16	15428.4	21744.9	14865.8	28705.1	2922.47	30129.9
Q61656	sp|Q61656|DDX5_MOUSE	Ddx5	0.974689	0.747915	0.8881	8	1.02314e+06	802996	928943	788317	878741	831737	1.02401e+06	890690
Q9CQP3	sp|Q9CQP3|CHCH5_MOUSE	Chchd5	0.754148	0.749432	0.8881	1	58455.3	53119.7	16983	33069.1	10664.9	44433.4	25745.6	441897
Q91V61	sp|Q91V61|SFXN3_MOUSE	Sfxn3	0.974631	0.750922	0.88828	8	1.97529e+06	1.39041e+06	1.82261e+06	1.68145e+06	1.72334e+06	1.69141e+06	1.83832e+06	1.74082e+06
Q3UPL0	sp|Q3UPL0|SC31A_MOUSE	Sec31a	1.089	0.751363	0.889037	5	395733	179931	246192	201807	173091	152162	291687	327425
Q9QZM0	sp|Q9QZM0|UBQL2_MOUSE	Ubqln2	1.2901	0.752145	0.889037	1	52553.2	17700.8	35479.5	61186.1	50092.7	4602.45	138969	22753.8
Q9QYG0	sp|Q9QYG0|NDRG2_MOUSE	Ndrg2	0.974007	0.753759	0.889504	6	573655	480538	667179	531184	597216	512314	617023	574973
O89112	sp|O89112|LANC1_MOUSE	Lancl1	1.02214	0.757103	0.889504	2	127105	138763	163776	147777	125565	146295	139840	152240
Q91WG5	sp|Q91WG5|AAKG2_MOUSE	Prkag2	1.32164	0.758967	0.889504	1	18098.6	26411.6	69592	43530.8	2589.64	27028.4	72329.1	93748.9
Q9Z239	sp|Q9Z239|PLM_MOUSE	Fxyd1	0.885288	0.760929	0.889774	1	22440.2	15530.5	6298.36	14531.7	19938.2	6789.69	22600.8	16973
Q91VR8	sp|Q91VR8|BRK1_MOUSE	Brk1	0.89024	0.762218	0.889774	1	29665.8	24056.7	21246.1	28597.4	19117	23039.9	18702.7	83803.6
P55066	sp|P55066|NCAN_MOUSE	Ncan	1.07545	0.763694	0.889774	4	124931	120361	94576.9	112950	89555.6	103929	192627	66975.3
Q8R4E6	sp|Q8R4E6|PURG_MOUSE	Purg	0.882119	0.763998	0.889787	2	45706.1	19528.8	38957.3	27808	42077.3	15951.9	28031.6	84877.1
P97807	sp|P97807|FUMH_MOUSE	Fh	0.963328	0.764907	0.889787	8	810714	1.12172e+06	1.1055e+06	1.11784e+06	1.27361e+06	1.09127e+06	1.12454e+06	834928
P61082	sp|P61082|UBC12_MOUSE	Ube2m	0.973215	0.76532	0.891002	3	236587	195109	214073	186428	235673	197346	182164	242384
P0DP28	sp|P0DP28|CALM3_MOUSE	Calm3	0.823257	0.765408	0.89212	1	36827.2	88322.1	56835.7	58571.3	156308	69395	168293	12913
O35639	sp|O35639|ANXA3_MOUSE	Anxa3	1.07805	0.76562	0.89212	1	44814.2	26039.2	23893.9	23898.9	16284.6	24139.8	33383.4	37592.9
P68369	sp|P68369|TBA1A_MOUSE	Tuba1a	0.956447	0.767472	0.892459	18	7.19305e+07	4.23172e+07	7.14723e+07	4.62895e+07	5.46584e+07	6.23361e+07	5.72544e+07	6.16881e+07
P24668	sp|P24668|MPRD_MOUSE	M6pr	1.26877	0.769143	0.893785	1	110119	35059.1	151827	147846	26253	586043	46193.4	47054.5
Q99LF4	sp|Q99LF4|RTCB_MOUSE	Rtcb	0.901615	0.769391	0.89716	2	36472.7	114093	116042	116806	114118	104629	124483	57425.9
Q80UM3	sp|Q80UM3|NAA15_MOUSE	Naa15	1.0608	0.769512	0.898777	1	28279.8	43295	23889.9	27294.2	42707.6	25700	22175.1	25904.1
Q60605	sp|Q60605|MYL6_MOUSE	Myl6	1.2714	0.771048	0.900507	1	20448.9	1282.33	5764.18	13031.6	7088.61	5479.01	1330.85	14584.1
Q9D8Y0	sp|Q9D8Y0|EFHD2_MOUSE	Efhd2	0.885191	0.772971	0.901441	1	15570.3	10966.9	10829.7	16199.9	23129.3	12611.6	5355	31237.1
P10630	sp|P10630|IF4A2_MOUSE	Eif4a2	0.952126	0.77444	0.901908	4	1.00841e+06	626170	785175	732658	630279	833323	726620	1.15815e+06
Q9CZY3	sp|Q9CZY3|UB2V1_MOUSE	Ube2v1	1.07072	0.775354	0.901908	4	275329	410212	439250	422173	318997	445152	529021	212122
Q8R164	sp|Q8R164|BPHL_MOUSE	Bphl	1.06141	0.775432	0.901908	5	281591	351819	211470	390912	384174	299478	295086	190059
P60764	sp|P60764|RAC3_MOUSE	Rac3	0.925422	0.775656	0.901908	1	43764.3	29453.2	28520.6	30232.6	49406.2	52510	18677	31275.1
Q9CPQ8	sp|Q9CPQ8|ATP5L_MOUSE	Atp5mg	1.06555	0.776519	0.901908	1	119371	211297	233697	243336	191884	242771	188822	126495
Q8C052	sp|Q8C052|MAP1S_MOUSE	Map1s	1.05678	0.777261	0.901908	1	102186	71398.3	70521.6	59288	48807.6	71510.3	69742.1	100481
P46460	sp|P46460|NSF_MOUSE	Nsf	1.01161	0.777357	0.903499	37	1.4392e+07	1.57229e+07	1.632e+07	1.5591e+07	1.636e+07	1.52778e+07	1.54617e+07	1.42262e+07
P35278	sp|P35278|RAB5C_MOUSE	Rab5c	0.959507	0.777574	0.904126	2	74971.4	63894.1	64720	55520.4	75787.1	89069.1	59506.6	50555.4
P97300	sp|P97300|NPTN_MOUSE	Nptn	1.1039	0.778595	0.904126	4	354881	325127	95527.9	368985	270849	258798	201702	193713
P47738	sp|P47738|ALDH2_MOUSE	Aldh2	1.01748	0.77875	0.904126	11	863355	855415	816107	841701	776013	844553	968133	745983
Q9DC07	sp|Q9DC07|LNEBL_MOUSE	Nebl	1.14429	0.780623	0.90534	2	31050.2	53622.4	45851.8	10944.5	42764.5	18842.5	44009.5	13742.2
Q9CQI3	sp|Q9CQI3|GMFB_MOUSE	Gmfb	0.983149	0.78142	0.907007	3	364048	324374	328852	290364	312969	311336	360120	343949
P57746	sp|P57746|VATD_MOUSE	Atp6v1d	0.947633	0.78215	0.907673	4	211359	201515	187267	252347	215360	138196	290794	288392
Q9CR67	sp|Q9CR67|TMM33_MOUSE	Tmem33	0.690634	0.783893	0.907673	1	129961	2889.07	71837.6	37940.5	101016	85227.9	2562.6	203882
Q9CQA1	sp|Q9CQA1|TPPC5_MOUSE	Trappc5	0.886497	0.786577	0.907673	1	65602.9	109133	49024.3	53141.2	106609	63984.7	163077	27148.7
Q8R0S4	sp|Q8R0S4|CACB4_MOUSE	Cacnb4	1.30951	0.787873	0.907673	1	35701.2	2829.48	48206.4	47125.5	33969.9	41284	24161.4	2303.09
P84091	sp|P84091|AP2M1_MOUSE	Ap2m1	0.947384	0.788231	0.907673	13	1.23763e+06	2.45297e+06	2.00018e+06	2.24673e+06	2.51792e+06	2.11683e+06	2.18578e+06	1.45367e+06
Q8BYA0	sp|Q8BYA0|TBCD_MOUSE	Tbcd	0.751782	0.788707	0.907673	1	4945.29	101358	9701.64	5111.59	14588.2	119084	12522.7	3577.08
Q9CZC8	sp|Q9CZC8|SCRN1_MOUSE	Scrn1	0.910933	0.788806	0.907673	7	363736	723326	430335	466791	752723	431168	249300	948636
Q8C437	sp|Q8C437|PEX5R_MOUSE	Pex5l	0.8758	0.788887	0.907673	1	367451	319727	91842.4	87038.1	89595.1	289852	251285	244617
Q80U95	sp|Q80U95|UBE3C_MOUSE	Ube3c	1.141	0.790483	0.90787	1	4091.4	1080.63	3691.28	2157.92	2256.02	930.765	1822.89	5428.54
O35681	sp|O35681|SYT3_MOUSE	Syt3	1.20652	0.791616	0.90787	1	19687.9	20902.5	25320.3	20323.7	25244.4	33487.2	48696.9	2427.62
Q6PCP5	sp|Q6PCP5|MFF_MOUSE	Mff	0.72478	0.79251	0.909464	1	301462	157345	195116	5275.99	171294	256224	286129	14090.8
Q8VCC9	sp|Q8VCC9|SPON1_MOUSE	Spon1	1.23253	0.795658	0.909803	1	69559.3	121878	25415.2	4012.91	30132.1	37010.6	16260.2	20661.6
Q8VEH5	sp|Q8VEH5|EPMIP_MOUSE	Epm2aip1	1.23133	0.796043	0.910064	1	70291.8	50295.4	2821.16	44304.1	28356.3	23411.7	24816.2	11668
Q99J99	sp|Q99J99|THTM_MOUSE	Mpst	0.924094	0.798575	0.911503	3	113886	278884	131675	272964	301305	154344	142138	236828
Q7TQI3	sp|Q7TQI3|OTUB1_MOUSE	Otub1	1.02347	0.800659	0.913769	7	1.17166e+06	1.0231e+06	915031	1.10782e+06	1.11338e+06	1.02533e+06	843366	1.15029e+06
P45591	sp|P45591|COF2_MOUSE	Cfl2	0.86074	0.801846	0.913769	1	23693.3	19965.1	15944.8	94342.1	14220.1	99902.1	26095.8	34969.3
Q6ZQ82	sp|Q6ZQ82|RHG26_MOUSE	Arhgap26	1.17214	0.80186	0.913769	1	65997.3	10210.3	44116.3	32916.9	8059.52	33194.2	26881.7	72082.9
P13595	sp|P13595|NCAM1_MOUSE	Ncam1	1.03206	0.802082	0.913769	8	440106	477379	403025	480086	501317	513370	443133	314175
P03930	sp|P03930|ATP8_MOUSE	Mtatp8	0.974804	0.805443	0.913769	1	200785	146680	167076	156404	163016	146561	207133	172224
Q61553	sp|Q61553|FSCN1_MOUSE	Fscn1	1.02334	0.805468	0.913769	14	1.57696e+06	1.43849e+06	1.15177e+06	1.45149e+06	1.36227e+06	1.31039e+06	1.20885e+06	1.60248e+06
O35215	sp|O35215|DOPD_MOUSE	Ddt	0.911823	0.8057	0.915029	3	117273	244112	134231	117861	177138	99196.9	373764	99760
Q9WUB3	sp|Q9WUB3|PYGM_MOUSE	Pygm	0.979164	0.806881	0.915751	13	1.51655e+06	1.16906e+06	1.10704e+06	1.30232e+06	1.34875e+06	1.29228e+06	1.14038e+06	1.39901e+06
P58389	sp|P58389|PTPA_MOUSE	Ptpa	1.01558	0.808282	0.916196	2	298329	293703	312506	315784	265325	314944	281927	345028
Q6NZB0	sp|Q6NZB0|DNJC8_MOUSE	Dnajc8	1.27242	0.809214	0.9191	1	100254	14160.1	111274	14650.7	16243.7	27939.9	7489.44	259740
Q8C0D5	sp|Q8C0D5|EFL1_MOUSE	Efl1	1.16717	0.810395	0.9191	1	26259.4	10811.7	31226	21016.1	3363.02	30505.9	43294.5	22602.9
Q8BK64	sp|Q8BK64|AHSA1_MOUSE	Ahsa1	0.914862	0.810527	0.920842	3	298663	186099	115169	266275	296110	151777	127160	425754
P61979	sp|P61979|HNRPK_MOUSE	Hnrnpk	1.03535	0.810965	0.922522	7	527507	468254	402015	352552	387902	477966	319453	514405
P11627	sp|P11627|L1CAM_MOUSE	L1cam	0.816291	0.81287	0.922522	1	6343.71	4696	8842.49	10014.1	27031.3	835.338	21868.7	12031.6
Q3V3R1	sp|Q3V3R1|C1TM_MOUSE	Mthfd1l	1.02052	0.813002	0.922522	7	669952	656157	740136	613042	746238	546090	724560	622806
Q791V5	sp|Q791V5|MTCH2_MOUSE	Mtch2	0.970606	0.813096	0.922522	3	150796	131975	142111	103664	126921	125832	174991	118201
P62715	sp|P62715|PP2AB_MOUSE	Ppp2cb	0.976432	0.815937	0.924911	2	246694	239176	180604	227263	254719	220903	249746	189584
Q9CPW0	sp|Q9CPW0|CNTP2_MOUSE	Cntnap2	0.890701	0.815982	0.924911	1	57717.5	16048.2	13116.7	18174.6	19304.1	20938.9	13418.7	64681.6
Q99JX3	sp|Q99JX3|GORS2_MOUSE	Gorasp2	0.948577	0.819006	0.924911	1	5357.24	6161.33	9617.01	3744.51	5881.44	7008.63	7528.41	4730.85
P61205	sp|P61205|ARF3_MOUSE	Arf3	1.19029	0.819901	0.925676	1	13611.5	168625	197738	150961	123143	113287	94066	26010
Q5EBJ4	sp|Q5EBJ4|ERMIN_MOUSE	Ermn	0.927535	0.820158	0.926692	1	30631.3	10435.9	10192.9	7510.17	13995.3	10956.5	13807.4	15615.3
Q9CQV8	sp|Q9CQV8|1433B_MOUSE	Ywhab	0.956378	0.820444	0.92717	4	418571	849034	778403	712541	886289	565893	756087	621309
D3YZU1	sp|D3YZU1|SHAN1_MOUSE	Shank1	0.814412	0.821624	0.927405	1	28338	1324.36	43651.4	35552.4	20752.3	31670.1	23403.6	8607.31
Q99JR1	sp|Q99JR1|SFXN1_MOUSE	Sfxn1	0.943376	0.822101	0.927405	3	134646	173765	219221	154712	191600	239593	237153	92028.3
Q91WD5	sp|Q91WD5|NDUS2_MOUSE	Ndufs2	0.88423	0.824735	0.927405	2	18237.4	52829.7	59724	64476.8	18887.2	39517	51053.5	159277
Q2NL51	sp|Q2NL51|GSK3A_MOUSE	Gsk3a	0.949586	0.825795	0.928074	3	83062.5	149362	167170	188589	157615	197568	148263	104193
Q8R127	sp|Q8R127|SCPDL_MOUSE	Sccpdh	1.08478	0.825993	0.928074	1	72539.8	20086.5	70173.5	42477	39469.5	52763.6	59309	25393.9
Q9D1G5	sp|Q9D1G5|LRC57_MOUSE	Lrrc57	0.823627	0.827475	0.928074	1	17368.7	88048.1	5218.14	19908.8	7762.72	9682.76	42331.5	108505
Q7TMK9	sp|Q7TMK9|HNRPQ_MOUSE	Syncrip	0.922634	0.82753	0.930189	2	63868.5	73666.7	28360	95553.8	31987.8	76681.6	90275.2	79460.3
P20152	sp|P20152|VIME_MOUSE	Vim	1.07707	0.828219	0.930189	2	23557.3	91859.9	83973.5	70698.5	43412	60536.7	64873.2	55992.7
P42208	sp|P42208|SEPT2_MOUSE	Septin2	0.920848	0.828359	0.932911	2	131781	74261.4	24222.8	54743.5	62584.4	51495.9	74759.8	74905.8
O55042	sp|O55042|SYUA_MOUSE	Snca	0.938117	0.828644	0.932911	3	270803	446884	208643	327489	346079	273555	584427	192962
Q9JJV5	sp|Q9JJV5|CCG3_MOUSE	Cacng3	1.12592	0.829465	0.932911	1	4926.38	37800.7	20676.6	21164.7	14539.3	13908	7637.42	32834.7
Q64105	sp|Q64105|SPRE_MOUSE	Spr	0.926579	0.830703	0.932911	2	203084	61002.2	115312	118070	74193	177404	190941	91049.7
Q8K2T1	sp|Q8K2T1|NMRL1_MOUSE	Nmral1	0.907715	0.831647	0.933616	1	48649.3	34684.5	49000.5	18717.5	36968.3	51997.4	14270.5	83102.3
F6SEU4	sp|F6SEU4|SYGP1_MOUSE	Syngap1	1.03904	0.831806	0.933616	1	81938.6	70043.9	69702.2	56324.5	43392.2	76911.5	65306.4	88697.2
Q8BK08	sp|Q8BK08|TMM11_MOUSE	Tmem11	0.957191	0.832434	0.936017	1	97927.1	77689.3	65186.8	80259.6	76006.2	103138	52018.1	116279
P43274	sp|P43274|H14_MOUSE	Hist1h1e	0.95813	0.833658	0.936264	3	161046	248109	162877	215205	180295	203119	314038	144508
Q99KE1	sp|Q99KE1|MAOM_MOUSE	Me2	0.887421	0.833806	0.936264	1	6567.84	22663.3	34791.3	25819.3	55669.3	18451.1	8000.74	26234.5
P09528	sp|P09528|FRIH_MOUSE	Fth1	0.974195	0.834017	0.936321	1	98240	125036	115551	117962	112872	121611	151102	89624.9
P70236	sp|P70236|MP2K6_MOUSE	Map2k6	0.973526	0.834195	0.936321	1	76059.1	58238.2	60954.7	69813.3	58942.6	55423.8	72648.3	88422.6
Q3UH68	sp|Q3UH68|LIMC1_MOUSE	Limch1	1.1593	0.83464	0.936321	1	18241.1	85454	41866.5	15047.8	98459.2	8893.99	44553.2	13934.8
Q8CIB5	sp|Q8CIB5|FERM2_MOUSE	Fermt2	0.974709	0.83575	0.936321	2	62060.7	43619.4	64660.1	59124.7	65279.9	48925.2	53344.6	67297.5
Q8BMS1	sp|Q8BMS1|ECHA_MOUSE	Hadha	1.01951	0.837686	0.936321	17	1.1563e+06	1.16794e+06	1.28248e+06	1.12961e+06	1.21563e+06	923633	1.15486e+06	1.39659e+06
P47802	sp|P47802|MTX1_MOUSE	Mtx1	0.948613	0.840821	0.936661	1	16345.5	41994.6	36892.1	40907.1	31031.1	38282.1	42310	25452.7
Q922H2	sp|Q922H2|PDK3_MOUSE	Pdk3	0.961879	0.841155	0.937212	2	59653.5	106488	67995.2	92435.4	81495.5	117876	64031.1	75826.3
Q9D8B4	sp|Q9D8B4|NDUAB_MOUSE	Ndufa11	1.12899	0.841753	0.937212	1	104466	21371.2	16569.6	7634.96	27749.6	28569.4	16781	13067.4
Q8VEM8	sp|Q8VEM8|MPCP_MOUSE	Slc25a3	0.957124	0.843134	0.937212	12	2.28934e+06	4.7707e+06	4.55833e+06	4.31583e+06	4.90366e+06	4.57211e+06	4.05193e+06	2.81832e+06
Q9CX34	sp|Q9CX34|SGT1_MOUSE	Sugt1	1.05446	0.843725	0.937212	4	141786	68580.4	99639.7	105786	98350.6	69975	70455.7	170977
Q8VIM9	sp|Q8VIM9|IRGQ_MOUSE	Irgq	1.03313	0.844072	0.937212	1	68495.8	47941.7	59231	45049.9	41194.9	51860.6	74676.2	48210.5
Q8BPQ7	sp|Q8BPQ7|SGSM1_MOUSE	Sgsm1	0.922607	0.845479	0.937212	2	63604.5	15086.9	53296.2	54252.8	34855.7	54832.6	28037.1	71464.8
P63038	sp|P63038|CH60_MOUSE	Hspd1	0.992987	0.847085	0.937212	22	2.3473e+06	2.59814e+06	2.31129e+06	2.42964e+06	2.58544e+06	2.46119e+06	2.39e+06	2.31618e+06
Q922Q1	sp|Q922Q1|MARC2_MOUSE	Marc2	1.05309	0.847382	0.937212	2	71631.9	91529.7	112637	102502	105527	91554.2	139736	45589.6
Q62077	sp|Q62077|PLCG1_MOUSE	Plcg1	0.922005	0.847929	0.937212	1	27869.1	20403.5	22710.7	50898.4	17369.6	42809.6	71062.7	17213
Q9CS84	sp|Q9CS84|NRX1A_MOUSE	Nrxn1	1.15901	0.848557	0.937874	1	27073.4	56407.7	11377.7	10165.2	29456.9	32458.3	37130.1	2757.21
Q3UYC0	sp|Q3UYC0|PPM1H_MOUSE	Ppm1h	0.861478	0.848992	0.939461	1	67980.3	23468.7	47883.7	55509.2	6608.06	66908.9	156089	111563
P12658	sp|P12658|CALB1_MOUSE	Calb1	0.970711	0.851208	0.942178	3	61723.3	113267	111843	103103	103021	87638.8	107757	93326.2
O35943	sp|O35943|FRDA_MOUSE	Fxn	1.17181	0.854563	0.942178	1	54987	45719.6	8569.47	3495.54	10888.7	5613.77	57073.2	11448.4
Q8BKZ9	sp|Q8BKZ9|ODPX_MOUSE	Pdhx	0.980044	0.855498	0.942261	2	66373.1	52572.6	68404.7	56644.8	73820	55265	69197.5	51916
P45952	sp|P45952|ACADM_MOUSE	Acadm	0.941765	0.856006	0.943098	2	93253.1	49102.5	63982.9	61718.8	112380	30135.8	86659.6	78323.5
P61982	sp|P61982|1433G_MOUSE	Ywhag	0.981291	0.85747	0.943098	9	727711	1.10017e+06	1.03585e+06	863244	975932	851458	920306	1.00958e+06
Q3U4G3	sp|Q3U4G3|XXLT1_MOUSE	Xxylt1	0.951565	0.858644	0.943098	1	55907.6	47930.2	54445	46057	60712.1	80938.6	67184.7	24824.4
P70303	sp|P70303|PYRG2_MOUSE	Ctps2	1.06738	0.859219	0.944083	1	44018.6	14171	29092.6	26157.8	12582.9	41990	32378	21378.5
Q8K400	sp|Q8K400|STXB5_MOUSE	Stxbp5	0.962356	0.859377	0.945035	3	199769	106000	183987	111815	109724	136475	187674	180725
P62746	sp|P62746|RHOB_MOUSE	Rhob	0.963475	0.860012	0.945035	4	203842	256643	181423	277703	320307	306648	203963	152678
Q922P9	sp|Q922P9|GLYR1_MOUSE	Glyr1	0.907643	0.861978	0.94506	1	78236.3	43390.1	38243.7	10640	43066.2	24943.5	20909.5	90615.8
Q8C0M9	sp|Q8C0M9|ASGL1_MOUSE	Asrgl1	1.02697	0.86277	0.945074	7	275017	443429	339923	435956	426961	400926	280403	338481
Q3UHJ0	sp|Q3UHJ0|AAK1_MOUSE	Aak1	0.975883	0.862934	0.945074	12	754047	595634	588926	432664	579949	614879	498210	710240
P61021	sp|P61021|RAB5B_MOUSE	Rab5b	1.06951	0.862975	0.946376	1	23545.5	30962.9	27337.8	17383.5	36229.4	47328.6	12414.3	12439.3
Q99P72	sp|Q99P72|RTN4_MOUSE	Rtn4	0.951919	0.863757	0.946376	3	78517.9	123638	107534	126717	95792	87473.2	80679.9	238307
Q9JL26	sp|Q9JL26|FMNL1_MOUSE	Fmnl1	0.925732	0.864308	0.949514	1	37345.9	14048.5	55415.4	19731.9	13191.1	27464.8	40592.6	53116.1
Q01405	sp|Q01405|SC23A_MOUSE	Sec23a	1.06157	0.864464	0.949945	3	122720	76238.7	51656.4	100378	106203	46006.4	53013.9	147475
P47963	sp|P47963|RL13_MOUSE	Rpl13	1.04103	0.864533	0.949945	3	70563.1	154786	153642	187983	138502	142124	107864	126500
Q4KML4	sp|Q4KML4|ABRAL_MOUSE	Abracl	0.891301	0.867267	0.950983	1	8063.81	1428.84	2338.94	4727.25	3043.03	1113.62	3920.12	15195.3
Q9CX00	sp|Q9CX00|IST1_MOUSE	Ist1	1.19464	0.868201	0.95134	1	21183.8	29866.6	186649	14591.2	25931.2	4360.01	284298	26318.9
Q9CYH2	sp|Q9CYH2|PXL2A_MOUSE	Prxl2a	0.990461	0.869009	0.95134	1	96162.2	106780	101869	108980	95866.5	110882	96318.6	115690
Q8K285	sp|Q8K285|FCHO1_MOUSE	Fcho1	1.11219	0.870088	0.95134	1	3256.23	9123.03	22866.4	8348.65	7746.11	3166.93	5129.64	29454.3
Q80VP0	sp|Q80VP0|TCPR1_MOUSE	Tecpr1	0.894106	0.870091	0.951458	1	18188.5	3818.93	15230.9	7060.28	14499	2333.8	10834.7	31879.4
Q9QXG4	sp|Q9QXG4|ACSA_MOUSE	Acss2	1.04875	0.870609	0.951779	1	29536.5	37071.6	40673.4	32623.2	33236.4	17549.4	31212	65969.8
Q8BWY3	sp|Q8BWY3|ERF1_MOUSE	Etf1	0.973936	0.872693	0.951779	2	127438	78124.1	71980.5	107130	82857.8	112850	83476.7	109317
Q8K0T4	sp|Q8K0T4|KATL1_MOUSE	Katnal1	0.829797	0.872954	0.951779	1	20839.8	182417	5508.71	9398.15	12346.3	8018.57	14970.7	280082
P55258	sp|P55258|RAB8A_MOUSE	Rab8a	0.861006	0.874204	0.951779	1	45721.6	1251.29	19604	31334.9	5214.83	27005.2	28247.1	16075.6
P62855	sp|P62855|RS26_MOUSE	Rps26	1.06946	0.874878	0.951779	1	11638.4	50052.3	37952.9	28330.2	34675	44989.8	13876.9	22117.7
Q99L47	sp|Q99L47|F10A1_MOUSE	St13	0.968563	0.875957	0.951779	2	100937	114177	111478	121849	112157	107935	193044	76117.5
Q8K0U4	sp|Q8K0U4|HS12A_MOUSE	Hspa12a	1.00877	0.876369	0.951779	16	2.37633e+06	2.50344e+06	2.53733e+06	2.62503e+06	2.57616e+06	2.81529e+06	2.32578e+06	2.26844e+06
P97820	sp|P97820|M4K4_MOUSE	Map4k4	0.898181	0.876586	0.951779	1	613752	127609	602082	115688	131922	687618	135360	682663
P14152	sp|P14152|MDHC_MOUSE	Mdh1	0.987949	0.877413	0.954206	12	4.76917e+06	5.24318e+06	4.90283e+06	5.27043e+06	5.34123e+06	5.31779e+06	5.75209e+06	4.15138e+06
P33173	sp|P33173|KIF1A_MOUSE	Kif1a	0.983225	0.878751	0.95465	7	743238	519975	530865	474730	506317	604842	569266	597789
P61079	sp|P61079|UB2D3_MOUSE	Ube2d3	1.01686	0.879451	0.954954	1	134536	160912	159363	157403	179247	162500	152604	114263
Q9JLI8	sp|Q9JLI8|SART3_MOUSE	Sart3	1.1602	0.88141	0.954964	1	35901	3534.22	53270.7	18987.1	41612.1	13380.9	58779.4	2164.12
P70295	sp|P70295|AUP1_MOUSE	Aup1	0.832168	0.88163	0.954964	1	104773	184515	11023.9	4686.32	23786.9	7288.72	37606	319417
Q9QYR6	sp|Q9QYR6|MAP1A_MOUSE	Map1a	1.03409	0.881991	0.954964	20	1.31423e+06	1.00393e+06	1.11103e+06	865733	814700	827325	888431	1.8533e+06
Q9DCW4	sp|Q9DCW4|ETFB_MOUSE	Etfb	0.986339	0.88215	0.956371	6	708884	568446	542776	508697	575195	512894	658329	605275
O35927	sp|O35927|CTND2_MOUSE	Ctnnd2	1.04452	0.882672	0.956371	4	127245	77496.7	95910.8	81734.5	143479	44552.7	83179	122139
Q58A65	sp|Q58A65|JIP4_MOUSE	Spag9	0.977974	0.883012	0.957158	1	36678.6	37345.8	38727.1	26678.8	33977.6	28931.7	49317.4	31912.3
Q62318	sp|Q62318|TIF1B_MOUSE	Trim28	0.926374	0.884553	0.957313	1	68124.9	23896	55514.2	40736.4	13837.3	58033.9	51671.3	120474
Q3UM45	sp|Q3UM45|PP1R7_MOUSE	Ppp1r7	0.95322	0.884724	0.957436	6	337281	298993	343000	535994	186574	435049	363654	760774
Q9DCT1	sp|Q9DCT1|AKCL2_MOUSE	Akr1e2	1.04113	0.885727	0.957436	2	109869	88311.1	69773.8	85215.8	58460	88131.4	167635	56849
Q80X95	sp|Q80X95|RRAGA_MOUSE	Rraga	1.0453	0.885807	0.957436	1	85638.6	40529.3	48048	43736.8	25298.9	65874.9	49061	74721.9
Q9Z1Z0	sp|Q9Z1Z0|USO1_MOUSE	Uso1	0.941272	0.887141	0.957758	7	495905	438509	551807	443245	431479	402175	241785	1.61489e+06
P27546	sp|P27546|MAP4_MOUSE	Map4	0.990523	0.888154	0.958638	3	186455	166064	166729	139799	164153	154412	169799	174198
Q8R326	sp|Q8R326|PSPC1_MOUSE	Pspc1	0.936862	0.888173	0.95882	1	22621	25162.5	10989.9	31416.4	11411	19634.4	16975.4	67073.2
Q61696	sp|Q61696|HS71A_MOUSE	Hspa1a	1.1823	0.888727	0.959217	1	148823	1.97482e+06	2.30026e+06	101282	1.20759e+06	143442	88502.3	2.28587e+06
Q8BRF7	sp|Q8BRF7|SCFD1_MOUSE	Scfd1	0.968368	0.888876	0.959217	1	66577.9	60438.2	52020.1	53186.4	41112.7	49416.5	56981.8	109362
Q8CHH9	sp|Q8CHH9|SEPT8_MOUSE	Septin8	1.01439	0.889564	0.959217	8	932681	1.27216e+06	1.31388e+06	1.28258e+06	1.29159e+06	1.00008e+06	1.23564e+06	1.18317e+06
Q9D1T0	sp|Q9D1T0|LIGO1_MOUSE	Lingo1	0.95331	0.891235	0.959217	2	107736	149680	70746.2	273473	126718	121374	105310	233224
Q9CY73	sp|Q9CY73|RM44_MOUSE	Mrpl44	1.08867	0.892683	0.959217	1	104847	45618.8	19938.1	31427.2	35108.5	9872.53	71660.6	85897.7
Q61016	sp|Q61016|GBG7_MOUSE	Gng7	0.894964	0.892837	0.959217	1	6554	90426.6	144636	108124	72123.8	85790	100264	23287.1
Q6PEB6	sp|Q6PEB6|PHOCN_MOUSE	Mob4	1.04317	0.892856	0.959917	1	21909.5	32308.8	17595.2	13090.5	17112	22846.9	32555.1	10817.8
P51174	sp|P51174|ACADL_MOUSE	Acadl	0.970338	0.894196	0.959917	3	125002	169513	244137	199330	188290	272727	185922	121828
Q8K3I9	sp|Q8K3I9|GLCI1_MOUSE	Glcci1	0.954572	0.895057	0.959935	1	12788.8	24513	28969.2	31590.9	48752	13345.8	25340.4	20957.6
Q91V92	sp|Q91V92|ACLY_MOUSE	Acly	0.989078	0.895229	0.959935	13	949872	1.19652e+06	1.2382e+06	1.12432e+06	1.12773e+06	1.20409e+06	976262	1.24713e+06
P32037	sp|P32037|GTR3_MOUSE	Slc2a3	1.02518	0.895582	0.96037	2	194756	297074	372437	293590	281546	339449	307963	194590
Q3TES0	sp|Q3TES0|IQEC3_MOUSE	Iqsec3	0.923906	0.897072	0.96037	2	147627	48975.4	31257	48371.1	49726.9	17812.5	164167	103173
Q7M759	sp|Q7M759|AB17B_MOUSE	Abhd17b	1.07951	0.897097	0.96037	1	41724.9	20793.7	16386.7	25273	6584.33	17555.1	26740.3	85601.7
Q9ERD7	sp|Q9ERD7|TBB3_MOUSE	Tubb3	1.01548	0.897107	0.96037	11	5.40401e+06	4.99517e+06	3.97779e+06	5.28964e+06	5.36811e+06	4.36874e+06	3.93208e+06	5.7922e+06
Q91Y86	sp|Q91Y86|MK08_MOUSE	Mapk8	1.00867	0.897809	0.96037	1	146879	119931	134324	133982	118280	143405	144038	125354
Q9CQN1	sp|Q9CQN1|TRAP1_MOUSE	Trap1	1.01941	0.898271	0.960537	2	108630	130205	139421	134124	134135	131691	85973.9	161271
Q3UHD9	sp|Q3UHD9|AGAP2_MOUSE	Agap2	1.01284	0.898782	0.961764	4	187540	136752	163813	167319	179596	182310	149071	136854
Q8C7X2	sp|Q8C7X2|EMC1_MOUSE	Emc1	1.11726	0.900891	0.961784	1	13573.2	17389.3	722.675	22972.8	14506.9	6791.58	3614.15	7062.34
P63141	sp|P63141|KCNA2_MOUSE	Kcna2	0.977038	0.901586	0.961784	2	361782	246153	221393	253019	247269	247167	215468	415700
Q99LG2	sp|Q99LG2|TNPO2_MOUSE	Tnpo2	0.956554	0.901794	0.961784	2	144944	67518.4	36720.5	102292	54210.6	113740	67213.6	105944
Q99MN1	sp|Q99MN1|SYK_MOUSE	Kars	1.07446	0.902902	0.962331	1	23538.6	100853	170097	74553.8	121144	104845	22906.9	77635.9
Q922D8	sp|Q922D8|C1TC_MOUSE	Mthfd1	0.988169	0.904748	0.962331	6	459027	374267	453897	366695	406113	425282	498455	348343
P70398	sp|P70398|USP9X_MOUSE	Usp9x	1.02564	0.908253	0.962331	4	182993	103591	92512.7	145062	122464	108893	94508.1	182413
Q9JHK4	sp|Q9JHK4|PGTA_MOUSE	Rabggta	1.00956	0.908268	0.962331	5	311791	256607	302614	256325	270466	256281	260314	331098
Q60770	sp|Q60770|STXB3_MOUSE	Stxbp3	1.07763	0.90847	0.962331	1	16926.8	21163.2	45988.4	33662.9	4882.79	46857.5	26562.9	67663
Q810U3	sp|Q810U3|NFASC_MOUSE	Nfasc	0.984334	0.908656	0.962331	12	952188	646083	554807	729313	598004	708690	785922	796080
Q61187	sp|Q61187|TS101_MOUSE	Tsg101	0.979251	0.908674	0.962331	1	38929.9	38670.2	55823.3	44912.7	46820.7	60240	29318.2	49637.4
Q9JKD3	sp|Q9JKD3|SCAM5_MOUSE	Scamp5	0.981695	0.909575	0.962408	2	178957	312192	302992	290659	327820	267989	276833	217827
Q80TL1	sp|Q80TL1|ADCY2_MOUSE	Adcy2	1.06097	0.910228	0.962408	2	50433.9	22597.6	31240.9	69326.1	12486.5	103351	32823.3	45989.2
Q8C079	sp|Q8C079|STRP1_MOUSE	Strip1	1.04888	0.911121	0.962408	1	62222.9	36745.5	29131.2	26128	15282.1	37233.9	28837.4	87625.4
O35841	sp|O35841|API5_MOUSE	Api5	0.964693	0.91196	0.963912	3	66553.6	35210.5	55529.3	93170.6	100839	51560.7	34368.3	78339.8
P09055	sp|P09055|ITB1_MOUSE	Itgb1	1.17131	0.91306	0.963912	1	295042	13292.6	21080.4	48989.6	4768.85	5063.55	167440	532187
Q99L43	sp|Q99L43|CDS2_MOUSE	Cds2	1.02338	0.915071	0.963912	1	160688	68926.5	148512	143262	141807	109349	128693	107657
P97427	sp|P97427|DPYL1_MOUSE	Crmp1	1.00698	0.916173	0.964524	13	1.87514e+06	1.70161e+06	1.533e+06	1.92474e+06	1.90857e+06	1.69253e+06	1.60465e+06	1.76642e+06
P63005	sp|P63005|LIS1_MOUSE	Pafah1b1	0.986939	0.916831	0.965923	3	177846	245199	276282	254314	270094	245303	251909	193491
Q9JKB1	sp|Q9JKB1|UCHL3_MOUSE	Uchl3	0.961561	0.918106	0.967246	3	98861.6	86915.5	80511.8	57356	99922.5	29590.3	119661	131188
Q59J78	sp|Q59J78|NDUF2_MOUSE	Ndufaf2	0.934646	0.918384	0.967246	1	68279.6	11696.9	8566.44	4020.61	13972.6	8015.01	21154.9	15215
Q8VEK3	sp|Q8VEK3|HNRPU_MOUSE	Hnrnpu	0.983293	0.920186	0.967246	3	231160	264731	201341	164861	224818	255141	149636	253158
Q80U63	sp|Q80U63|MFN2_MOUSE	Mfn2	1.02761	0.921012	0.967246	4	344643	154661	223254	135194	128051	185749	269616	224979
Q9D0F9	sp|Q9D0F9|PGM1_MOUSE	Pgm1	1.04078	0.922363	0.967246	7	191439	668247	714849	630457	315745	676780	740881	310362
Q8JZN5	sp|Q8JZN5|ACAD9_MOUSE	Acad9	0.974683	0.922775	0.967633	6	307579	306414	356270	308288	282508	255606	230936	687787
P63001	sp|P63001|RAC1_MOUSE	Rac1	0.988793	0.922825	0.967755	5	591670	916736	817182	808320	768810	881251	830135	666403
P60843	sp|P60843|IF4A1_MOUSE	Eif4a1	0.986581	0.922884	0.968134	3	768320	501268	604843	613133	522567	653305	542831	813498
Q9Z2I0	sp|Q9Z2I0|LETM1_MOUSE	Letm1	1.02866	0.923396	0.968453	1	83527.5	86246.6	268888	95832.7	111951	115525	123087	104147
P67871	sp|P67871|CSK2B_MOUSE	Csnk2b	0.920064	0.923761	0.969049	1	26146.4	15893.5	10690.7	2717.35	1521.2	16663	25605.6	25956.1
Q9JHI5	sp|Q9JHI5|IVD_MOUSE	Ivd	1.03928	0.924667	0.97004	4	464448	279759	214776	194905	213623	213853	146462	696817
Q9JJV2	sp|Q9JJV2|PROF2_MOUSE	Pfn2	0.972157	0.925019	0.970088	3	187720	479578	388019	487995	484263	480152	365274	224705
Q99LB6	sp|Q99LB6|MAT2B_MOUSE	Mat2b	0.988773	0.925061	0.970088	2	159751	111029	116296	117583	104212	129965	122358	153117
Q06185	sp|Q06185|ATP5I_MOUSE	Atp5me	0.988927	0.925074	0.970088	2	224883	251226	209114	247247	257300	244293	280057	173493
Q9WUM4	sp|Q9WUM4|COR1C_MOUSE	Coro1c	1.00716	0.925351	0.970088	4	353983	333438	370455	349519	302266	333235	421438	349893
Q8CDG3	sp|Q8CDG3|VCIP1_MOUSE	Vcpip1	1.02091	0.926386	0.970088	4	164666	84297.4	95061.1	103975	115926	70026.8	104365	149077
Q6I6G8	sp|Q6I6G8|HECW2_MOUSE	Hecw2	1.04858	0.926586	0.970088	1	5918.73	6844.43	3339.44	6312.81	8082.88	2093.81	15310.1	2726.33
O70456	sp|O70456|1433S_MOUSE	Sfn	0.888398	0.926938	0.970088	1	277684	7762.18	7812.17	3311.68	7400.98	12211	6310.29	156977
Q505D7	sp|Q505D7|OPA3_MOUSE	Opa3	0.988799	0.92735	0.970088	1	72039.4	62539.6	62586	54897.9	72812.3	59778.6	76774.8	48457.2
Q9D906	sp|Q9D906|ATG7_MOUSE	Atg7	1.09485	0.927655	0.970088	1	17011.9	158722	25096.3	10875.4	18480.1	15861.4	7372.95	237326
Q3UYH7	sp|Q3UYH7|ARBK2_MOUSE	Adrbk2	1.08701	0.928267	0.970088	1	16307.4	23466	8783.14	35855.9	20286.2	13553.2	2302.47	136352
P16460	sp|P16460|ASSY_MOUSE	Ass1	1.05036	0.92859	0.970088	1	55763.9	38314.1	57810.1	32479.2	56755	82541.1	9502.81	74036.6
Q6P8X1	sp|Q6P8X1|SNX6_MOUSE	Snx6	1.03146	0.931596	0.970088	2	85491.9	52337.3	59235.8	41161.5	33368.2	83126.5	107817	32228.9
Q9CZX8	sp|Q9CZX8|RS19_MOUSE	Rps19	0.966493	0.932671	0.970088	2	46978.2	31836.5	29573.1	29035.1	13512.5	27655.7	63356.1	62163.9
P54775	sp|P54775|PRS6B_MOUSE	Psmc4	1.0238	0.933696	0.970088	4	98305.4	85159	46026	73403.5	60113.7	89784	42470.5	112308
Q99LC5	sp|Q99LC5|ETFA_MOUSE	Etfa	1.00504	0.933854	0.970088	7	698138	724232	727794	700965	667258	761971	623753	797175
Q9CR68	sp|Q9CR68|UCRI_MOUSE	Uqcrfs1	1.00788	0.934644	0.970088	4	477881	574124	441141	561654	437361	543299	586290	472870
P68181	sp|P68181|KAPCB_MOUSE	Prkacb	1.00651	0.936091	0.970088	3	482550	436145	496788	495604	423851	487427	426095	573562
P28738	sp|P28738|KIF5C_MOUSE	Kif5c	1.00978	0.93686	0.970088	12	761159	484314	580660	645757	633520	595569	502552	701167
Q6Q477	sp|Q6Q477|AT2B4_MOUSE	Atp2b4	1.0113	0.937079	0.970088	8	576730	771705	946379	877915	861548	816664	831774	604085
Q8BTV2	sp|Q8BTV2|CPSF7_MOUSE	Cpsf7	0.984904	0.937745	0.970088	1	131460	256629	247638	218720	233547	207423	254522	157497
O88712	sp|O88712|CTBP1_MOUSE	Ctbp1	1.00429	0.937887	0.970088	9	867181	1.02813e+06	885640	898924	908552	954609	827926	971713
Q8CBE3	sp|Q8CBE3|WDR37_MOUSE	Wdr37	0.987583	0.940028	0.970088	4	270175	173376	211086	190008	189154	179367	188807	308316
P62897	sp|P62897|CYC_MOUSE	Cycs	0.990188	0.940455	0.970088	3	325535	299997	249056	345260	258838	283135	415412	286937
P60487	sp|P60487|PLPP_MOUSE	Pdxp	0.974484	0.942559	0.970088	9	2.72376e+06	1.74215e+06	2.26521e+06	1.09218e+06	2.60786e+06	1.99276e+06	847841	2.95463e+06
Q9WUT3	sp|Q9WUT3|KS6A2_MOUSE	Rps6ka2	0.974853	0.94323	0.972664	1	26971.3	17486.9	19665.7	23811.2	32621.6	17630.1	9862.75	43111.3
P46061	sp|P46061|RAGP1_MOUSE	Rangap1	1.0553	0.943249	0.973222	1	59286.3	54181.5	14200.2	15864.7	10326.9	11199.3	35402.9	142502
O88935	sp|O88935|SYN1_MOUSE	Syn1	0.991281	0.943634	0.973328	15	2.80443e+06	4.30213e+06	3.02404e+06	4.22799e+06	4.01801e+06	3.47915e+06	3.33951e+06	3.42214e+06
Q3USB7	sp|Q3USB7|PLCL1_MOUSE	Plcl1	0.965351	0.945499	0.973328	2	76315	39126.2	21099.6	58342.8	39251.3	35361.1	21157.4	144130
Q6DFV3	sp|Q6DFV3|RHG21_MOUSE	Arhgap21	1.01877	0.945617	0.973588	1	30705.9	11354.4	30020	23343.3	26850.5	26413.1	16479.9	19405.7
Q91VT4	sp|Q91VT4|CBR4_MOUSE	Cbr4	1.05486	0.946282	0.974147	1	36897.9	26664.4	11359.1	40757.7	4548.64	80108.5	76697.9	13163.1
Q8BTM8	sp|Q8BTM8|FLNA_MOUSE	Flna	0.972253	0.947617	0.974147	2	35228.2	22517.4	15243.3	63137.9	20668.9	42791.3	54703.3	17659.3
Q61990	sp|Q61990|PCBP2_MOUSE	Pcbp2	1.00416	0.9479	0.974147	3	530594	541002	529848	456931	530668	573257	479824	468266
Q8JZR0	sp|Q8JZR0|ACSL5_MOUSE	Acsl5	0.952449	0.948508	0.974147	1	27478.2	8893.26	49040.7	6780.9	34852	6299.73	7659.32	58720.2
Q8C0C7	sp|Q8C0C7|SYFA_MOUSE	Farsa	0.974147	0.949722	0.974147	2	40359.5	34288.3	37209.5	47257.7	38573.9	19561.9	29381.1	121885
Q8BWT5	sp|Q8BWT5|DIP2A_MOUSE	Dip2a	0.961011	0.949793	0.975689	1	15123.1	32336	11470.5	34145.7	38174.1	38713.2	35304.7	4303.98
Q91YQ5	sp|Q91YQ5|RPN1_MOUSE	Rpn1	1.00753	0.951495	0.975689	2	162344	112792	102510	113765	112385	117740	143389	109223
P62281	sp|P62281|RS11_MOUSE	Rps11	1.02856	0.951907	0.976735	1	87203.8	59035.9	17132.2	75771.3	62771.4	44133.6	25983.7	82949.8
Q80VC9	sp|Q80VC9|CAMP3_MOUSE	Camsap3	1.0143	0.953364	0.976735	3	88777.4	59238.4	82278.4	55331.3	44526.5	62782.8	117570	68825
Q80Y17	sp|Q80Y17|L2GL1_MOUSE	Llgl1	0.933429	0.955148	0.976735	1	25189.6	392143	247210	311307	502821	9223.04	530434	407075
Q8BH95	sp|Q8BH95|ECHM_MOUSE	Echs1	0.990442	0.955772	0.976735	2	107634	94477.1	79568.1	84440.5	81543.7	76469.1	144657	78710.5
Q80TL7	sp|Q80TL7|MON2_MOUSE	Mon2	0.97245	0.958775	0.977663	1	34410.7	79955.2	82416.6	13729.2	34186.9	20933.1	78474.4	61988.5
P62071	sp|P62071|RRAS2_MOUSE	Rras2	0.943962	0.959857	0.977663	1	393749	409694	29829.4	451904	984958	52579.4	1.11195e+06	47558.8
Q9D2R0	sp|Q9D2R0|AACS_MOUSE	Aacs	1.01512	0.959862	0.977789	1	49687.5	23190.3	26065.7	21835.7	24888	33988.2	16407.2	44500.5
Q80W47	sp|Q80W47|WIPI2_MOUSE	Wipi2	0.986636	0.96124	0.978337	1	25275.6	40764.3	18900.6	19663.9	25952.2	19133.5	43703.6	18621.5
Q9D0M5	sp|Q9D0M5|DYL2_MOUSE	Dynll2	1.00839	0.961769	0.978337	1	250416	264105	179105	297758	266850	222392	178127	322685
P63044	sp|P63044|VAMP2_MOUSE	Vamp2	1.02739	0.963638	0.978404	2	32419.1	155069	43815.9	140892	145663	87913.1	22604.1	96230.2
Q8C8R3	sp|Q8C8R3|ANK2_MOUSE	Ank2	1.00739	0.965114	0.978607	17	1.54668e+06	1.30586e+06	1.04346e+06	1.41109e+06	1.34145e+06	1.14938e+06	992372	1.88724e+06
Q9CQV5	sp|Q9CQV5|RT24_MOUSE	Mrps24	0.961705	0.96658	0.978607	1	4450.88	13423.2	92399.6	114412	22390.7	18852.2	106341	16449.1
Q9D1G2	sp|Q9D1G2|PMVK_MOUSE	Pmvk	1.0123	0.966627	0.979664	1	29018.3	46092.8	30841.1	27035.3	29024	44453.5	50282.6	16370.1
Q99N28	sp|Q99N28|CADM3_MOUSE	Cadm3	0.977306	0.971584	0.979664	1	6233.64	76123.8	14988.3	57185.3	16247.8	38651.3	33009.6	21506.9
Q8JZU2	sp|Q8JZU2|TXTP_MOUSE	Slc25a1	0.994922	0.972247	0.980603	1	51334.9	81168	67229.7	61611.5	69940.8	83589.6	56627.5	53205.2
Q69Z98	sp|Q69Z98|BRSK2_MOUSE	Brsk2	0.991705	0.972797	0.981877	2	186407	184851	203829	178711	95140.4	261866	223496	233055
P11499	sp|P11499|HS90B_MOUSE	Hsp90ab1	1.00097	0.973792	0.981958	18	5.73164e+06	6.06365e+06	5.49126e+06	5.52424e+06	5.67274e+06	5.51398e+06	5.62452e+06	5.96935e+06
P10639	sp|P10639|THIO_MOUSE	Txn	1.00877	0.974758	0.984474	2	136843	181674	176850	148675	182997	163857	267403	78725.8
D3YZI9	sp|D3YZI9|PGBD5_MOUSE	Pgbd5	1.00563	0.97503	0.984474	1	65313.3	40050.2	52701.2	48648.3	43701.1	38925.6	73600.1	52377.3
P70188	sp|P70188|KIFA3_MOUSE	Kifap3	1.01626	0.976109	0.984474	2	71745.5	9160.23	24049.5	29530.9	14787.4	19647.5	25603.6	58825.3
Q99PT1	sp|Q99PT1|GDIR1_MOUSE	Arhgdia	0.997994	0.976342	0.985307	5	434669	443561	350326	397923	442485	385386	378747	419495
Q9EQP2	sp|Q9EQP2|EHD4_MOUSE	Ehd4	0.996523	0.978038	0.985307	2	119036	102685	91973.2	85172.7	100807	108234	75384.7	118048
Q9JL04	sp|Q9JL04|FMN2_MOUSE	Fmn2	1.01481	0.978572	0.98666	1	4129.7	1757.41	4604.76	1737.01	2312.43	912.423	3153.96	8225.11
Q9DCX2	sp|Q9DCX2|ATP5H_MOUSE	Atp5pd	1.00226	0.978676	0.987609	4	488181	452548	386372	399305	441447	389695	501613	391443
P63213	sp|P63213|GBG2_MOUSE	Gng2	0.987358	0.978891	0.988034	2	92622.5	227227	154190	226447	236327	179101	348830	52369.4
O88986	sp|O88986|KBL_MOUSE	Gcat	1.01906	0.979395	0.988034	1	56096	22563.6	45427.4	66236.8	8522.68	31231.1	196314	67582.6
Q9WVP1	sp|Q9WVP1|AP1M2_MOUSE	Ap1m2	1.01424	0.980593	0.992537	1	12480.6	71981.8	84557.2	66516.8	78492.3	61659.1	55875.5	17657.8
Q8K4Q0	sp|Q8K4Q0|RPTOR_MOUSE	Rptor	0.9923	0.980917	0.99265	2	58898.5	98602.1	142253	47873.9	90824.9	122837	72372.2	50520.8
Q8BUV3	sp|Q8BUV3|GEPH_MOUSE	Gphn	0.997296	0.981639	0.99265	4	261819	210367	267256	196911	190430	234052	285252	230466
Q9JIS5	sp|Q9JIS5|SV2A_MOUSE	Sv2a	1.00204	0.98184	0.993103	7	734820	898728	911302	781660	947816	720564	908421	752071
Q8C3F2	sp|Q8C3F2|F120C_MOUSE	Fam120c	1.00483	0.982072	0.99324	1	51129.6	29121.2	23566.9	32392.9	30967.5	26674.7	28888.5	46723.6
Q8CGC7	sp|Q8CGC7|SYEP_MOUSE	Eprs	0.99741	0.982878	0.99324	8	330096	333452	277899	271558	249465	302977	276574	401511
Q8C166	sp|Q8C166|CPNE1_MOUSE	Cpne1	0.981952	0.984668	0.993451	1	6960.12	7641.06	3905.4	11652.1	6134.02	974.002	6109.83	71308.8
Q6PHN9	sp|Q6PHN9|RAB35_MOUSE	Rab35	1.00366	0.98488	0.993451	1	28056.9	47895.4	44899.8	42818.5	44288.3	39762.8	52955.2	27301.3
Q6PIC6	sp|Q6PIC6|AT1A3_MOUSE	Atp1a3	1.00171	0.985441	0.993665	31	1.15235e+07	1.26074e+07	9.3969e+06	1.24692e+07	1.31093e+07	1.06345e+07	1.01178e+07	1.19863e+07
Q91V12	sp|Q91V12|BACH_MOUSE	Acot7	0.997654	0.986924	0.993665	7	1.57673e+06	2.35326e+06	2.08718e+06	2.30342e+06	2.17135e+06	2.6898e+06	1.75678e+06	1.75497e+06
Q8BVI4	sp|Q8BVI4|DHPR_MOUSE	Qdpr	1.00199	0.987127	0.993665	3	269765	393714	370545	335610	352812	385546	364610	264201
P30677	sp|P30677|GNA14_MOUSE	Gna14	0.997539	0.987393	0.993665	1	298009	458353	459831	385631	435084	446335	441905	285047
Q5EG47	sp|Q5EG47|AAPK1_MOUSE	Prkaa1	1.00655	0.988265	0.993665	1	33520.9	28089.3	20507.3	23658.2	33212.7	44884.2	39310.8	7594.27
Q9CWM4	sp|Q9CWM4|PFD1_MOUSE	Pfdn1	1.01886	0.98837	0.993665	1	133367	623148	20990.2	42878.1	422526	12239.5	23508	570950
Q9DAS9	sp|Q9DAS9|GBG12_MOUSE	Gng12	1.00704	0.990707	0.993665	1	8674.54	13280.5	9625.04	5092.09	4010.71	9995.48	37713.5	3631.17
Q9WUI1	sp|Q9WUI1|MK11_MOUSE	Mapk11	1.00079	0.991091	0.993665	1	157871	126158	144173	143530	126089	152510	156369	136628
Q9QWI6	sp|Q9QWI6|SRCN1_MOUSE	Srcin1	1.00151	0.991426	0.993665	11	617919	588023	551227	444696	537094	420313	535829	731892
Q8BJH1	sp|Q8BJH1|ZC21A_MOUSE	Zc2hc1a	0.997439	0.991716	0.993665	1	13763.6	16268.6	12085.2	8448.68	13682.8	17330.8	13706.5	7106.54
Q6P3D0	sp|Q6P3D0|NUD16_MOUSE	Nudt16	1.00861	0.991787	0.993921	1	154612	10167	17560.7	10302.6	9251.18	18156.4	19143.2	85465.7
Q99PU5	sp|Q99PU5|ACBG1_MOUSE	Acsbg1	1.00307	0.992109	0.994829	8	1.83319e+06	1.17123e+06	532634	1.1398e+06	1.37663e+06	1.34469e+06	738911	941369
P61294	sp|P61294|RAB6B_MOUSE	Rab6b	1.00149	0.995003	0.994829	1	106213	102323	82074.7	127213	75393.9	135491	68854.4	160367
P24527	sp|P24527|LKHA4_MOUSE	Lta4h	1.00089	0.997119	0.994836	5	102972	215530	228366	268845	194534	249505	181667	153983
Q9DBH5	sp|Q9DBH5|LMAN2_MOUSE	Lman2	1.00379	0.997254	0.995003	1	165190	306696	14015	164723	371918	24206.1	27725.5	461551
P62962	sp|P62962|PROF1_MOUSE	Pfn1	1.0004	0.997536	0.995003	4	723963	1.04263e+06	944520	1.09324e+06	924572	1.10456e+06	1.01757e+06	748839
Q9JIG7	sp|Q9JIG7|CCD22_MOUSE	Ccdc22	0.998675	0.998557	0.995003	2	170276	280838	69670.5	87638.4	300639	27361.9	83947.6	425065
Q9QUM9	sp|Q9QUM9|PSA6_MOUSE	Psma6	1.00001	0.999944	0.995003	3	166733	152062	122916	160205	174247	134442	198604	107305
					0.995003
					0.995427
					0.995427
					0.995427
					0.995427
					0.995427
					0.995427
					0.997775
					0.998646
					0.998646
					0.998646
					0.999112
					0.999944

## Sheet: Sheet2
Figure 3 Source data
SWATH-MS data from quantification of BONCAT purified proteins from trained and non-trained RC3xCamk2a-Cre. For each of the 1,782 proteins quantified, the name, Uniprot identifier, gene name, fold change in trained compared to non-trained mice, p-value, Benjamini & Hochberg adjusted p-value, number of peptides sequences used for quantified, and the normalised protein peak area are given. Proteins …
